# Supplementary material for: Financing of surgery and anaesthesia in sub-Saharan Africa: a scoping review
Source: PubMed Central journal article supplement — BMJ Open. 2021 Oct 18;11(10):e051617. doi: 10.1136/bmjopen-2021-051617 (PMC8527159; doi:10.1136/bmjopen-2021-051617), 2021-10-18
Supplement: bmjopen-2021-051617.draft_revisions.pdf [file bmjopen-2021-051617.draft_revisions.pdf]

# BMJ Open

BMJ Open is committed to open peer review. As part of this commitment we make the peer review history of every article we publish publicly available.

When an article is published we post the peer reviewers' comments and the authors' responses online. We also post the versions of the paper that were used during peer review. These are the versions that the peer review comments apply to.

The versions of the paper that follow are the versions that were submitted during the peer review process. They are not the versions of record or the final published versions. They should not be cited or distributed as the published version of this manuscript.

BMJ Open is an open access journal and the full, final, typeset and author-corrected version of record of the manuscript is available on our site with no access controls, subscription charges or pay-per-view fees (<http://bmjopen.bmj.com>).

If you have any questions on BMJ Open's open peer review process please email [info.bmjopen@bmj.com](mailto:info.bmjopen@bmj.com)

# BMJ Open

## Financing of Surgery and Anaesthesia in Sub-Saharan Africa: A Scoping Review

|                               |                                                                                                                                                                                                                                                                                                                                                                                                                                                                                                                                                                                                                                                                                                                                                                                                                                                                      |
|-------------------------------|----------------------------------------------------------------------------------------------------------------------------------------------------------------------------------------------------------------------------------------------------------------------------------------------------------------------------------------------------------------------------------------------------------------------------------------------------------------------------------------------------------------------------------------------------------------------------------------------------------------------------------------------------------------------------------------------------------------------------------------------------------------------------------------------------------------------------------------------------------------------|
| Journal:                      | <i>BMJ Open</i>                                                                                                                                                                                                                                                                                                                                                                                                                                                                                                                                                                                                                                                                                                                                                                                                                                                      |
| Manuscript ID                 | bmjopen-2021-051617                                                                                                                                                                                                                                                                                                                                                                                                                                                                                                                                                                                                                                                                                                                                                                                                                                                  |
| Article Type:                 | Original research                                                                                                                                                                                                                                                                                                                                                                                                                                                                                                                                                                                                                                                                                                                                                                                                                                                    |
| Date Submitted by the Author: | 25-Mar-2021                                                                                                                                                                                                                                                                                                                                                                                                                                                                                                                                                                                                                                                                                                                                                                                                                                                          |
| Complete List of Authors:     | Ifeanyichi, Martilord; Radboudumc, Department for Health Evidence Aune, Ellis; Radboudumc, Department for Health Evidence Shrime, Mark; Royal College of Surgeons in Ireland, Department of Global Health and Social Medicine; Harvard Medical School, Department of Global Health and Social Medicine<br>Gajewski, Jakub ; Royal College of Surgeons in Ireland<br>Pittalis, Chiara ; Royal College of Surgeons in Ireland, Department of Epidemiology and Public Health Medicine<br>Kachimba, John; University of Zambia University Teaching Hospital, Department of Surgery<br>Borgstein, Eric; University of Malawi<br>Brugha, Ruairi; Royal College of Surgeons in Ireland, Department of Epidemiology and Public Health Medicine<br>Baltussen, Rob; Radboudumc, Department for Health Evidence<br>Bijlmakers, Leon; Radboudumc, Department for Health Evidence |
| Keywords:                     | Health policy < HEALTH SERVICES ADMINISTRATION & MANAGEMENT, HEALTH ECONOMICS, SURGERY, PUBLIC HEALTH                                                                                                                                                                                                                                                                                                                                                                                                                                                                                                                                                                                                                                                                                                                                                                |
|                               |                                                                                                                                                                                                                                                                                                                                                                                                                                                                                                                                                                                                                                                                                                                                                                                                                                                                      |

SCHOLARONE™  
Manuscripts

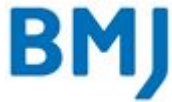

I, the Submitting Author has the right to grant and does grant on behalf of all authors of the Work (as defined in the below author licence), an exclusive licence and/or a non-exclusive licence for contributions from authors who are: i) UK Crown employees; ii) where BMJ has agreed a CC-BY licence shall apply, and/or iii) in accordance with the terms applicable for US Federal Government officers or employees acting as part of their official duties; on a worldwide, perpetual, irrevocable, royalty-free basis to BMJ Publishing Group Ltd ("BMJ") its licensees and where the relevant Journal is co-owned by BMJ to the co-owners of the Journal, to publish the Work in this journal and any other BMJ products and to exploit all rights, as set out in our [licence](#).

The Submitting Author accepts and understands that any supply made under these terms is made by BMJ to the Submitting Author unless you are acting as an employee on behalf of your employer or a postgraduate student of an affiliated institution which is paying any applicable article publishing charge ("APC") for Open Access articles. Where the Submitting Author wishes to make the Work available on an Open Access basis (and intends to pay the relevant APC), the terms of reuse of such Open Access shall be governed by a Creative Commons licence – details of these licences and which [Creative Commons](#) licence will apply to this Work are set out in our licence referred to above.

Other than as permitted in any relevant BMJ Author's Self Archiving Policies, I confirm this Work has not been accepted for publication elsewhere, is not being considered for publication elsewhere and does not duplicate material already published. I confirm all authors consent to publication of this Work and authorise the granting of this licence.

1  
2  
3 **Title of Manuscript:** Financing of Surgery and Anaesthesia in Sub-Saharan Africa: A Scoping  
4 Review  
5

6  
7 **Authors' Information:**  
8  
9

10 **1. Martilord Ifeanyi, MBBS, MSc \*** (Corresponding author)

11  
12 Affiliations: Department for Health Evidence, Radboud Institute for Health Sciences, Radboud  
13 University Medical Centre, Nijmegen, The Netherlands  
14

15 Email: [martilord.ifeanyi@radboudumc.nl](mailto:martilord.ifeanyi@radboudumc.nl)

16  
17 Tel: +31685497734

18  
19 Address: Geert Grooteplein-Noord 10, 6525 GA, Nijmegen, The Netherlands  
20  
21

22  
23 **2. Ellis Aune**

24 Affiliation: Department for Health Evidence, Radboud Institute for Health Sciences, Radboud  
25 University Medical Centre, Nijmegen, The Netherlands  
26

27 Email: [ellis.aune@student.ru.nl](mailto:ellis.aune@student.ru.nl)  
28  
29

30  
31 **3. Mark Shrime, MD, PhD**

32  
33 Affiliations: (i) Institute of Global Surgery, Royal College of Surgeons in Ireland, Dublin,  
34 Ireland  
35

36  
37 (ii) Department of Global Health and Social Medicine, Harvard Medical School, Boston, USA  
38

39 Email: [shrime@gmail.com](mailto:shrime@gmail.com)  
40  
41

42  
43 **4. Jakub Gajewski, PhD**

44 Affiliation: Institute of Global Surgery, Royal College of Surgeons in Ireland, Dublin, Ireland  
45

46 Email: [jakubgajewski@rcsi.ie](mailto:jakubgajewski@rcsi.ie)  
47  
48

49  
50 **5. Chiara Pittalis, MSc**

51 Affiliation: Department of Epidemiology and Public Health Medicine, Royal College of  
52 Surgeons in Ireland, Dublin, Ireland  
53

54 Email: [chiarapittalis@rcsi.ie](mailto:chiarapittalis@rcsi.ie)  
55  
56  
57  
58  
59  
60

1  
2  
3 6. John Kachimba, MD  
4

5 Affiliation: Surgical Society of Zambia, Department of Surgery, University Teaching Hospital,  
6 Nationalist Road, Lusaka, Zambia  
7

8 Email: [jskachimba@gmail.com](mailto:jskachimba@gmail.com)  
9  
10

11  
12 7. Eric Borgstein, MD  
13

14 Affiliation: College of Medicine, University of Malawi, Blantyre, Malawi  
15

16 Email: [eborg@me.com](mailto:eborg@me.com)  
17  
18

19 8. Ruairi Brugha, MD  
20

21 Affiliation: Department of Epidemiology and Public Health Medicine, Royal College of  
22 Surgeons in Ireland, Dublin, Ireland  
23

24 Email: [rbrugha@rcsi.ie](mailto:rbrugha@rcsi.ie)  
25  
26

27 9. Rob Baltussen, PhD  
28

29 Affiliation: Department for Health Evidence, Radboud Institute for Health Sciences, Radboud  
30 University Medical Centre, Nijmegen, The Netherlands  
31

32 Email: [rob.baltussen@radboudumc.nl](mailto:rob.baltussen@radboudumc.nl)  
33  
34

35  
36 10. Leon Bijlmakers, PhD, MSc  
37

38 Affiliation: Department for Health Evidence, Radboud Institute for Health Sciences, Radboud  
39 University Medical Centre, Nijmegen, The Netherlands  
40

41 Email: [leon.bijlmakers@radboudumc.nl](mailto:leon.bijlmakers@radboudumc.nl)  
42  
43

44 **Word Count: 4,301**  
45  
46  
47  
48  
49  
50  
51  
52  
53  
54  
55  
56  
57  
58  
59  
60

## ABSTRACT

**Objective:** This study aimed to conduct a situational analysis and provide a collation of current knowledge on financing of surgical and anaesthesia care across sub-Saharan Africa (SSA).

**Setting:** Surgery and anaesthesia services across all levels of care - primary, secondary and tertiary.

**Design:** We performed a scoping review of scientific databases (PubMed, EMBASE, Global Health and African Index Medicus), grey literature, and websites of development organisations. Screening and data extraction were conducted by two independent reviewers and abstracted data were summarized using thematic narrative synthesis per the financing domains: mobilization, pooling and purchasing.

**Results:** The search resulted in 5533 unique articles among which 149 met the inclusion criteria: 132 were related to mobilization, 17 to pooling, and 5 to purchasing. Neglect of surgery in national health priorities is widespread in SSA and no report was found on national level surgical expenditures or budgetary allocations. Financial protection mechanisms are weak or non-existent; poor patients often forego care or face financial catastrophes in seeking care, even in the context of universal public financing (free care) initiatives.

**Conclusion:** Financing of surgical and anaesthesia care in SSA is as poor as it is under-investigated, calling for increased national prioritisation and tracking of surgical funding. Improving availability, accessibility, and affordability of surgical and anaesthesia care require comprehensive and inclusive policy formulations.

**KEY WORDS:** Global Surgery; Sub-Saharan Africa; Health Financing; Universal Health Care; Health Accounts

### Strengths and Limitations of this Study

- This study was conducted based on standard guidelines, including Arksey and O'Malley (2005), Levac et al (2010), the Joanna Briggs Institute (2020), and PRISMA Statement and its extension for scoping reviews.
- It benefited from a comprehensive published and grey literature search strategy designed with the support of institutional bibliographers.
- The use of two independent reviewers and an arbiter ensured meticulousity while minimising biases in the review process.
- It thoroughly examines the situation and the current knowledge on the financing of surgery and anaesthesia in sub-Saharan Africa.
- Findings from one country may not represent the situation in other countries in the region.

## INTRODUCTION

Over 70% of the world population lack access to safe, timely and affordable surgical, obstetric and anaesthesia (SOA) care, with an estimated nine out of ten people affected in sub-Saharan Africa (SSA).<sup>1</sup> The Lancet Commission on Global Surgery (LCGS) has set a timeline of 2030 for 80% of the global population to have access to SOA care,<sup>2</sup> and as a strategy, it also recommended that low- and middle-income countries (LMICs) develop National Surgical, Obstetrics, and Anaesthesia Plans (NSOAPs), structured into five domains: service delivery, infrastructure, workforce, information management, and financing.<sup>2</sup> The financing system is critical to the achievement of universal access to surgical care, as it directly affects availability, accessibility and affordability of services.

Health financing is the “function of a health system concerned with the mobilization, accumulation and allocation of money to cover the health needs of the people, individually and collectively, in the health system”.<sup>3</sup> Three cardinal but interrelated functions of health financing are distinguished: revenue collection, resource pooling, and purchasing.<sup>3</sup> Resource mobilization refers to the ways in which revenues are raised and collected, including government budgetary allocations (from taxes), health insurance premiums, out-of-pocket payments (OOP) and donor funding. The pooling function refers to the mechanisms of accumulation of prepaid funds on behalf of populations in order to address financial challenges at the point of service delivery. Pooling delinks expected health expenditures from patients’ ability to pay,<sup>4</sup> and ideally protects people from catastrophic or impoverishing expenditure while accessing health services. The most common pooling mechanisms are government tax revenues pooling for health and health insurance schemes. The purchasing function refers to the payment systems for health goods and services provided.



1  
2  
3  
4  
5 To improve surgical financing, the LCGS recommended that national governments undertake  
6 the following: cover basic surgical care within Universal Health Coverage (UHC); pool risks  
7 in a single pool and reduce payments at point of service; track financial flows for surgery  
8 through national health accounts; and use value-based purchasing with risk-pooled funds.  
9  
10 Further, as progress assessment indicators, they proposed that surgical expenditure be reported  
11 as a percentage of GDP and as a percentage of annual health care expenditure; and that out-of-  
12 pocket payments on surgery, and catastrophic and impoverishing expenditure on surgery be  
13 monitored. It is noteworthy that catastrophic and impoverishing expenditures on surgery have  
14 been included in the World Bank World Development Indicators (WDI).<sup>5</sup>  
15  
16  
17  
18  
19  
20  
21  
22  
23  
24  
25  
26  
27

28 Since the LCGS report in 2015, five SSA countries have launched and are implementing their  
29 NSOAPs: Rwanda, Zambia, Tanzania, Nigeria and Madagascar.<sup>6</sup> Dozens of other SSA  
30 countries are either in the process of or have committed to the development of NSOAPs.  
31 Development of health policies require baseline analyses.<sup>7</sup> In the development of the Tanzania  
32 NSOAP, evidence from a systematic literature review by Nyberger et al guided a stakeholder  
33 discussion to directly inform the NSOAP priorities.<sup>8</sup> In the financing domain however, the  
34 review found only limited evidence – highlighting a paucity of research on the financing of  
35 surgery, especially at country levels. A collation of evidence from different countries may be  
36 beneficial to national health policy makers, and as more countries develop and adopt NSOAPs,  
37 there is a need for more evidence to guide these investments towards improving SOA care in  
38 sub-Saharan Africa.  
39  
40  
41  
42  
43  
44  
45  
46  
47  
48  
49  
50  
51  
52  
53  
54  
55

56 This study aimed therefore to answer the following question: *What is known about financing*  
57 *of surgery and anaesthesia in SSA?* We conducted a scoping review with the following  
58  
59  
60

1  
2  
3 objectives for each financing domain: (i) Describe the current status; (ii) Synopsise the  
4 available evidence; (iii) Produce a database of all studies related to the subject; (iv) Highlight  
5 the current challenges and explore the policy options ; and (v) Identify research gaps and guide  
6 future research efforts.  
7  
8  
9  
10  
11  
12  
13

## 14 **METHODS**

### 15 **Framework**

16  
17  
18  
19  
20  
21 The approach was based on Arksey and O'Malley<sup>9</sup> who provided the first methodological  
22 framework for conducting scoping reviews, supplemented with the recommendations of Levac  
23 et al<sup>10</sup> and the Joanna Briggs Institute (JBI).<sup>11</sup>  
24  
25  
26  
27  
28  
29  
30

### 31 **Search Strategy and Data Sources**

32  
33 The search query was designed based on three search blocks - "surgery and anaesthesia",  
34 "health financing", and "sub-Saharan Africa" - with the assistance of institution bibliographers.  
35  
36 The primary query was built on PubMed, in an iterative fashion, using a list of already  
37 identified relevant articles. The final PubMed query was adapted and applied to all the other  
38 databases. The full search string is included in Supplemental material 1 (S1).  
39  
40  
41  
42  
43  
44  
45  
46

47 We searched four bibliographic databases without any language restrictions: Global Health on  
48 22<sup>nd</sup> July 2020, and PubMed, Embase, and African Index Medicus on July 24<sup>th</sup>. Searches were  
49 restricted to articles published between January 2010 and July 2020, to capture a fairly current  
50 situation, while covering approximately five years before and after the LCGS report.  
51  
52 Conference proceedings, dissertations, and animal studies were excluded. Additionally, we  
53 performed snowballing by hand-searching for further possibly relevant articles cited in the  
54  
55  
56  
57  
58  
59  
60

1  
2  
3 identified articles. A grey literature search was conducted on Google, and websites of WHO,  
4  
5 World Bank, and USAID were also manually searched.  
6  
7  
8  
9

## 10 **Screening Process and Management**

11  
12  
13  
14 All search results were first imported into EndNote X9 for deduplication, and then exported to  
15  
16 Rayyan,<sup>12</sup> a web and mobile app designed for systematic reviews, for title and abstract  
17  
18 screening. The initial screening was performed independently by authors MI and EA. In case  
19  
20 of discrepancy, MI and EA reviewed the abstract together, and if no agreement could be  
21  
22 reached, author LB was consulted to make the final decision. In the second round, full texts of  
23  
24 included articles were reviewed independently and discussed by authors MI and EA, and LB  
25  
26 was again consulted in case of irresolvable discrepancies. French articles were handled solely  
27  
28 by author LB who possesses a full professional proficiency in French Language.  
29  
30  
31  
32  
33  
34

35  
36 The Population, Concept, and Context (PCC) framework described by the JBI<sup>11</sup> was used to  
37  
38 define the inclusion/exclusion criteria, which are included in Table 1. Relevance criteria were  
39  
40 applied in a hierarchical fashion: each article was assessed firstly on whether or not it pertained  
41  
42 to SSA, then whether or not it pertained to surgery, and lastly whether it covered financing of  
43  
44 surgery. All available sources were included.  
45  
46  
47  
48

49 Table 1: Inclusion and Exclusion Criteria

50  
51  
52  
53  
54  
55  
56  
57  
58  
59  
60

|                   | <b>Inclusion Criteria</b>                                                                                | <b>Exclusion Criteria</b>                                                |
|-------------------|----------------------------------------------------------------------------------------------------------|--------------------------------------------------------------------------|
| <b>Population</b> | <ul style="list-style-type: none"> <li>• General population</li> <li>• Major surgery patients</li> </ul> | <ul style="list-style-type: none"> <li>• Non-surgery patients</li> </ul> |

|                       |                                                                                                                                                                                                                                                                                                                     |                                                                                                                                                                                                                                                   |
|-----------------------|---------------------------------------------------------------------------------------------------------------------------------------------------------------------------------------------------------------------------------------------------------------------------------------------------------------------|---------------------------------------------------------------------------------------------------------------------------------------------------------------------------------------------------------------------------------------------------|
|                       | <ul style="list-style-type: none"> <li>• Operative and non-operative surgery patients</li> <li>• Healthcare providers</li> <li>• Health policy makers</li> <li>• Agencies or organisations Involved in surgery financing</li> </ul>                                                                                 | <ul style="list-style-type: none"> <li>• Medical gynaecological patients</li> <li>• Medical obstetric patients</li> <li>• Patients with minor procedures such as male circumcision, post-abortion care (e.g. manual vacuum aspiration)</li> </ul> |
| <p><b>Concept</b></p> | <ul style="list-style-type: none"> <li>• Financing of surgical care including user fees, tax funding, health insurance, donor funds</li> <li>• Universal health coverage</li> <li>• Equity in surgery care access</li> <li>• Impoverishing and catastrophic expenditures</li> <li>• Economics of surgery</li> </ul> | <ul style="list-style-type: none"> <li>• Costing studies (without financing data)</li> <li>• Cost-effectiveness studies (without financing data)</li> <li>• Studies focusing on the epidemiological or clinical aspects of surgeries</li> </ul>   |

|                |                                                                                                                                                                                           |                                                                                                                                                                                                                                                    |
|----------------|-------------------------------------------------------------------------------------------------------------------------------------------------------------------------------------------|----------------------------------------------------------------------------------------------------------------------------------------------------------------------------------------------------------------------------------------------------|
| <b>Context</b> | <ul style="list-style-type: none"> <li>• Primary, secondary and tertiary hospital care</li> <li>• Sub-Saharan Africa</li> <li>• Global surgery studies broadly (including SSA)</li> </ul> | <ul style="list-style-type: none"> <li>• Non-hospital primary health facilities (dispensaries, health posts, health centres)</li> <li>• Studies focusing on high-income countries only</li> <li>• Studies focusing on LMICs outside SSA</li> </ul> |
|----------------|-------------------------------------------------------------------------------------------------------------------------------------------------------------------------------------------|----------------------------------------------------------------------------------------------------------------------------------------------------------------------------------------------------------------------------------------------------|

### Data Extraction, Analysis and Synthesis

Data extraction and charting was performed using a customized form in Excel 2020 based on the JBI guidelines.<sup>11</sup> Sub-themes that emerged were noted and coded against the relevant financing function domains. Descriptive statistics were computed for the article characteristics. A narrative synthesis was employed in summarising the results of the research question, maintaining the three financing domains as the overarching themes. Results are presented as per PRISMA Statement<sup>13</sup> and its extension for scoping reviews (See Supplemental material 2[S2]).<sup>14</sup>

### Patient and Public Involvement

Patients or the public were not involved in the design, conduct, or reporting, or dissemination plans of our research.

## RESULTS

1  
2  
3 Following deduplication, our search resulted in 5533 unique articles. Text and abstract  
4 screening produced 229 articles, of which 149 met the inclusion criteria following full text  
5 reading (Figure 1). Most (132) were in English and nine were in French. Two-third of the  
6 articles were published between 2015 and 2020. In terms of geographical spread, the studies  
7 covered 28 countries: Nigeria had the highest number of articles (34), followed by Uganda (15)  
8 and Kenya (14). Eight articles were non-specific while several articles cut across more than  
9 one country. Details are presented in Supplemental material 3 (S3).

10  
11  
12  
13  
14  
15  
16  
17  
18  
19  
20 The majority of articles focused on specific surgical conditions or subspecialties (N=121;  
21 81%), while 28 were non-specific or dealt with surgical systems generally. Obstetrics (mostly  
22 Caesarean sections) had the highest number of articles (39), followed by ophthalmology (24;  
23 mostly cataract procedures), and oncology (17). The breakdown of the articles per specialty is  
24 presented in Figure 2.

25  
26  
27  
28  
29  
30  
31  
32 The majority of the articles were empirical (N=138; 92%); ten were opinion/editorial papers,  
33 while one was a technical brief. The empirical articles included 70 quantitative studies (81%),  
34 12 qualitative studies, 11 mixed-methods studies, and three systematic reviews. Most of the  
35 quantitative articles were descriptive (N=81; 72%); 12 were analytical (cohort or case-control);  
36 five were modelling studies; and 14 were quasi-experimental (including four interrupted time  
37 series analyses, two propensity score matching analyses, two difference-in-difference analyses,  
38 and six uncontrolled before-and-after studies).

39  
40  
41  
42  
43  
44  
45  
46  
47  
48  
49 The bulk of the articles related to the pooling and risk protection function of health financing  
50 (N=132; 89%); 17 related to financial resource mobilization (11%), and five to purchasing  
51 (3%). Some of the articles related to more than one domain. In the next sections, we present a  
52 thematic narrative of the data extracted from the various articles.  
53  
54  
55  
56  
57  
58  
59  
60

1  
2  
3 Figure 1: PRISMA flowchart of the search process  
4  
5  
6  
7  
8

9 Figure 2: Breakdown of the selected articles by surgical specialties  
10  
11  
12  
13  
14

### 15 **(I) Resource Mobilisation and Budgetary Allocations to Surgery.**

16  
17

18 Seventeen articles explored the resource mobilization for or allocations to surgery. No report  
19 of national or sub-national level budgetary allocations or actual expenditures on surgery was  
20 found. There was evidence of poor prioritization of surgery in government plans and UHC  
21 programmes in SSA generally: in a systematic review of National Health Strategic Plans  
22 (NHSPs) of 48 SSA countries by Citron et al (2016), 19% of NHSPs had no mention of surgery  
23 or surgical conditions, and 63% had five or fewer mentions of surgery. Compared to HIV and  
24 malaria that had 3772 mentions across all the plans, surgery had only 376 mentions. While  
25 33% of policies had no surgical targets, all had measurable targets for HIV and TB control.<sup>15</sup>  
26  
27  
28  
29  
30  
31  
32  
33  
34  
35

36  
37 Seven articles had data on revenue sources for surgery at the hospital level, with out-of-pocket  
38 payments (OOP),<sup>16-19</sup> government support,<sup>20</sup> and donor funds<sup>19 20</sup> identified as the biggest  
39 sources of the operational funds. In Ekenze and others' systematic review of studies published  
40 between January 2007 and November 2016 that reported the specific funding of paediatric  
41 surgeries in SSA, OOP was the predominant source of funding (91.4%), followed by NGO  
42 funding (60%).<sup>19</sup>  
43  
44  
45  
46  
47  
48  
49  
50

51 Regarding hospital expenditure on surgery, four studies were relevant.<sup>16 20-22</sup> In a retrospective  
52 cross-sectional study of the human and financial constraints to essential surgery at eight district  
53 hospitals (DHs) in Tanzania, Uganda, Mozambique, the DHs spent 7-14% of their operational  
54 funds on surgery, representing an annual per capita expenditure of US\$ 0.05 to 0.14.<sup>21</sup> The bulk  
55  
56  
57  
58  
59  
60

1  
2  
3 of this expenditure (3-8% of total operational cost) was attributed to obstetrics alone.  
4  
5 Comparable proportions (16-17%) were also reported at two DHs in Malawi.  
6  
7

8  
9 Several approaches to increasing the funding of surgery were recommended in the articles. In  
10 the review by Ekenze et al, the main suggestions were increased funding by national  
11 governments and by international organisations (85.7%), the establishment or improvement of  
12 health insurance schemes (60%) and the sustained use of charities and medical missions  
13 (42.9%).<sup>19</sup> Several papers in our review emphasized public-private partnerships,<sup>23 24</sup> as well as  
14 scale-up of health insurance coverage.<sup>25-27</sup> Rather than attempting to reinvent the wheel in the  
15 face of structural and economic constraints, Frimpong called on national governments to tweak  
16 and leverage on the existing market models to scale-up local production of surgical  
17 consumables, for example by replacing non-profitable tyre production with gloves and boots  
18 production, or production of cotton wool and gauze alongside or in place of cloth.<sup>28</sup>  
19  
20  
21  
22  
23  
24  
25  
26  
27  
28  
29  
30

31  
32 Reddy et al (2020) advocated moving beyond the traditional funding sources.<sup>29</sup> They suggested  
33 innovative financing instruments that have been applied in other global health initiatives, such  
34 as voluntary solidarity levy (as in Unitaid), voluntary contributions (PRODUCT[RED]),  
35 performance-based instruments (GAVI), and securities and bonds (International Finance  
36 Facility for Immunisation [IFFI] and The Children's Investment Fund Foundation [CIFF])  
37  
38  
39  
40  
41  
42  
43

## 44 **(II) Pooling/Risk Protection**

45  
46  
47 A total of 132 articles provided evidence related to pooling functions and financial protection.  
48  
49 Eight subthemes emerged. Some themes portrayed dysfunctionality of the financial protection  
50 systems and their implications for patients: financial barriers to access of care, transport cost  
51 barriers, OOP and catastrophic/impooverishing expenditure, payment coping mechanisms, and  
52 low willingness to pay. Others explored commonly available financial protection interventions:  
53 universal public financing, and health insurance. Other studies evaluated how best to  
54  
55  
56  
57  
58  
59  
60



1  
2  
3 simultaneously achieve health benefits, financial protection, equity and efficiency in surgical  
4 care delivery. Several articles cut across multiple themes. The eight thematic clusters and  
5  
6  
7 selected illustrative studies are presented below:  
8  
9

### 10 *1. Financial barriers to accessing surgical care*

11  
12  
13 The 55 articles in this cluster investigated patient reported obstacles or challenges to surgical  
14 care and reported “costs” or “lack of finances” as a major reason for not seeking<sup>30</sup> and for not  
15  
16  
17  
18  
19  
20  
21  
22  
23  
24  
25  
26  
27  
28  
29  
30  
31  
32  
33  
34  
35  
36  
37  
38  
39  
40  
41  
42  
43  
44  
45  
46  
47  
48  
49  
50  
51  
52  
53  
54  
55  
56  
57  
58  
59  
60  
obtaining surgical care (following recommendation);<sup>31 32</sup> and as a reason for experiencing  
delays in accessing,<sup>24 33</sup> or dropping out of the surgical continuum of care.<sup>34 35</sup> In a population-  
based survey to assess the surgical burden of diseases in Uganda, 66% of the people living with  
treatable surgical conditions cited cost as the reason for not seeking care.<sup>30</sup> A systematic review  
of barriers to cataract surgeries in Africa cautioned against face value interpretation of such  
findings, as “costs” are sometimes convenient masks for factors than inability to pay, such as  
unwillingness to pay and complex family decision-making dynamics.<sup>36</sup>

### 35 *2. Transport cost barrier*

36  
37  
38  
39  
40  
41  
42  
43  
44  
45  
46  
47  
48  
49  
50  
51  
52  
53  
54  
55  
56  
57  
58  
59  
60  
Closely related to the above financial access barriers, 12 articles highlighted the particular  
challenges presented by transport costs to accessing surgical care, even in situations where  
medical treatments are provided free of charge. In interviews and focus group discussions with  
64 patients living with lymphatic filariasis in Ahanta West District of Ghana, 64% cited indirect  
costs (transport and loss of wages) as the most prohibitive factor to seeking care, despite the  
cost of surgery being covered under the National Health Insurance Scheme (NHIS).<sup>37</sup>

### 53 *3. Out-of-Pocket, and Catastrophic and Impoverishing Expenditures*

54  
55  
56  
57  
58  
59  
60  
Twenty-six publications explored OOP and catastrophic or impoverishing expenditure  
incidences and reported high rates. In a study that modelled global country-level comparison  
of the financial burden of surgery, the risk of financial hardship from surgery was highest in

1  
2  
3 SSA, with up to 90% of patients facing the risks of catastrophes and up to 100% risk  
4 impoverishments.<sup>38</sup> Despite that health services are provided free of charge at public facilities  
5  
6 in Malawi, 90-97% of hernia patients still suffered catastrophic expenditure.<sup>39</sup>  
7  
8  
9

#### 10 *4. Patient Coping Mechanisms and Economic Consequences of Out-of-Pocket Payments*

11  
12  
13 Twelve articles provided insights into how households of surgical patients mobilise resources  
14 for OOPs as well as the adjustments they make in their daily lives to cope with the impact.  
15  
16 Despite the free obstetric care policy in Malawi, 31% of the women who received such care  
17 borrowed money, 24% sold assets, 17% used their savings, while others got help from family  
18 members abroad (17%) or their local social network (12%).<sup>40</sup> Reported compromises in every  
19 day spending in the face of catastrophic surgical expenditure included decreases in food  
20 consumption,<sup>40 41</sup> withdrawal of wards/children from school,<sup>40 42</sup> even as some households  
21 remained in debts several years after the surgery.<sup>40 41</sup>  
22  
23  
24  
25  
26  
27  
28  
29  
30  
31  
32

#### 33 *5. Willingness To Pay (WTP)*

34  
35 Three articles investigated the willingness of surgical patients to pay for services. Even though  
36 most patients were willing to pay “something”, their WTP was usually lower than the actual  
37 cost of getting the surgery.<sup>43 44</sup> In a hospital-based survey of patients who had received free  
38 surgery in Malawi, participants expressed willingness to pay a median of US\$3, which was  
39 substantially lower than US\$60, the estimated combined cost of screening, transport, feeding,  
40 accommodation, medicines and surgery.<sup>44</sup> Studies showed that WTP for surgical services  
41 increases remarkably with counselling on the benefit<sup>45</sup> and actual cost of the surgery,<sup>36</sup> and  
42 increased trust in providers.<sup>36</sup>  
43  
44  
45  
46  
47  
48  
49  
50  
51  
52  
53

#### 54 *6. Universal Public Financing (UPF) or Free Services*

55  
56  
57 In a bid to protect patients from financial hazards, governments in SSA have often abolished  
58 user fees in public hospitals, either for all or certain categories of care. Twenty-three articles  
59  
60

1  
2  
3 evaluated the implementation or the effects of such measures on service utilization and/or  
4  
5 financial protection.  
6  
7

8 Free maternal and under-five care in Sierra-Leone was associated with a five-fold increase in  
9  
10 the volume of paediatric surgeries in the 20 months after its introduction compared to 20  
11  
12 months before at a public tertiary hospital; above-five surgeries increased by only 17%<sup>46</sup>.  
13  
14 Perhaps partly reflecting differences in methodologies, conflicting reports were obtained on  
15  
16 the effects of fee removal on Caesarian section rates, with various studies reporting nil impact,  
17  
18 <sup>47 48</sup> increases,<sup>49</sup> and (possibly supplier-induced) excessive CS rates.<sup>50</sup>  
19  
20  
21  
22

23 Several papers reported significant financial hazards despite the free care policies, due to  
24  
25 informal direct medical costs, indirect medical costs (particularly transportation), or both.  
26  
27 Patients often encountered informal direct medical OOPs due to frequent drug stockouts,  
28  
29 equipment breakdowns, unofficial fees,<sup>42 49 51-53</sup> or outright bribery of health workers to  
30  
31 “facilitate” access to so-called free care.<sup>49 50 54 55</sup>  
32  
33  
34

35 The failure of UPF programmes across SSA to provide adequate financial protection has had  
36  
37 adverse implications for equitable access to care, as evidenced in six studies. Pro-rich inequities  
38  
39 were documented in use of CS several years after introduction of free obstetric care policies in  
40  
41 Ghana,<sup>56 57</sup> Mali,<sup>58 59</sup> and Benin.<sup>59</sup>  
42  
43  
44

45 Valuable insights were gained into the challenges confronting successful implementation of  
46  
47 UPF policies. Poor funding and delayed or incomplete hospital reimbursements were  
48  
49 commonly reported,<sup>52 60</sup> as was poor supervision and accountability mechanisms,<sup>60 61</sup> lack of  
50  
51 clarity on policy provisions e.g. which items or services ought to be paid for,<sup>54 61</sup> poor  
52  
53 specification and targeting of beneficiaries,<sup>50</sup> demotivation of hospital workers due to declines  
54  
55 in hospital finances,<sup>52</sup> and resistance among health professionals manifesting as “rent-seeking”  
56  
57 and corrupt practices to augment sagging personal incomes.<sup>50 54 60</sup>  
58  
59  
60

### 7. Health Insurance

Twenty-three articles provided insights into health insurance coverage and the degree of protection it provides for surgery patients in SSA. Health insurance coverage rates among cross-sections of emergency surgery patients studied were generally poor: about 3% in Nigeria,<sup>62</sup> 6% in Mali,<sup>63</sup> 8% in Tanzania,<sup>64</sup> 17% in Madagascar,<sup>65</sup> and 23% in Kenya.<sup>66</sup> Coverage rates stood out in Ghana (67%), courtesy of NHIF,<sup>67</sup> and Rwanda (98%) with its Community Health Insurance Fund (CHIF).<sup>68</sup> Instructively, higher rates were reported among elective surgery patients – 45% in Nigeria<sup>69</sup> and Tanzania,<sup>70</sup> and 90% in Kenya<sup>71</sup> – indicating a disproportionately higher uptake of elective services by the insured who are mostly the better off, at the expense of the poor.<sup>69 70</sup> This review found evidence of some level of financial protection from health insurance. For instance, in a study among surgical patients admitted over a period of eight months at a teaching hospital in Ghana, 58-87% of insured patients faced catastrophic expenditure, compared to 83-98% among the uninsured. The insured spent an average of 39% of their annual income on seeking surgical care compared to 61% of the uninsured.<sup>72</sup> Like the UPF programmes however, concerns of inequities remain.<sup>73</sup>

Various studies reported specific challenges associated with national health insurance schemes in SSA. In Nigeria for instance, NHIS is considered as bureaucratic and elitist, covering only civil servants and people of higher social status.<sup>25 69</sup> Beneficiaries have also reported lack of clarity about what services are covered or not, as well as confusion about payment and reimbursements mechanisms.<sup>25</sup> From the provider perspective, there have been worries about NHIS reimbursement rates being lower than the actual service costs, forcing some private providers to exit the programme, as well as delays in reimbursements which affect running of the facility.<sup>69 74</sup> Another major and common challenge recorded was shallowness of benefit coverages. Even though the insured had lower chances of catastrophic expenditure, a large proportion of them still suffered catastrophes,<sup>72</sup> and still employed “extreme” payment coping

1  
2  
3 strategies.<sup>41</sup> Although poor awareness of NHIF was noted as an issue in SSA, studies indicate  
4  
5 patient education and sensitization again make a huge difference.<sup>75</sup>  
6  
7

### 8 *8. Financial protection, equity and efficiency*

9

10  
11 An extended cost-effectiveness analysis by Shrima et al (2016) evaluated the health, financial  
12  
13 and equity impacts of nine common NGO and government strategies towards improving access  
14  
15 to surgery in Uganda. It showed that only mobile surgical programmes and policies that  
16  
17 simultaneously address surgical service scale-up (providers), out-of-pocket expenditure for  
18  
19 surgery, and (the often ignored) transport cost, can provide health and financial benefits,  
20  
21 equitably and efficiently.<sup>76</sup> A similar study in Ethiopia arrived at the same conclusion.<sup>77</sup>  
22  
23  
24  
25

### 26 **(III) Purchasing/Provider Payment**

27

28  
29 Five articles had findings related to the purchasing function of health financing. Surgery  
30  
31 providers in public institutions in SSA are generally salaried workers,<sup>78 79</sup> but poor  
32  
33 remuneration is widespread. In a multi-centre survey of 41 paediatric surgeons across 11  
34  
35 Francophone countries in SSA, the average salary in 2008 was just about 450 Euros per month  
36  
37 (ranging from 120 to 1400 Euros).<sup>79</sup>  
38  
39  
40

41  
42 Two studies explored the effect of payments mechanisms on hospital operations. A before-and-  
43  
44 after study in Burkina Faso showed that both government and household expenditure on CS  
45  
46 increased after the free delivery policy changed from retrospective fee-for-service payment to  
47  
48 prospective fee-for-service payment.<sup>80</sup> The other study showed that the introduction of  
49  
50 performance-based financing at DHs in Rwanda was associated with an increase in the number  
51  
52 of CS from 60 to 140 per quarter over a five-year period.<sup>81</sup>  
53  
54

## 55 **DISCUSSION**

56  
57  
58  
59  
60

1  
2  
3 Today, domestic resource mobilization for surgery in SSA is grossly deficient due to the double  
4 jeopardy of an overall constrained fiscal space for health and poor political prioritisation of  
5 surgery. Using Shiffman and Smith's analysis framework for assessing global health priorities,  
6  
7  
8 Frimpong-Boateng (2019) attributed the neglect to "the failure to communicate a clear policy  
9  
10 need using powerful ideas that take advantage of the political contexts of the times".<sup>28</sup> There  
11  
12  
13 is clearly a need for champions, including practitioners, scholars, public servants, and  
14  
15 professional societies who would leverage political affiliations and use empirical evidence to  
16  
17 project surgery into political consciousness at different levels, as has been witnessed in the few  
18  
19 countries that have adopted NSOAPs.<sup>6 82 83</sup>  
20  
21  
22

23  
24 Another direct consequence of the national level neglect of surgery in SSA is the literature  
25  
26 lacuna on surgical allocations and expenditures, as revealed in this review, contrary to the  
27  
28 LCGS recommendations. In a further search for possible insights, we reviewed five SSA  
29  
30 NSOAPs that were accessible via Google (Ethiopia, Nigeria, Rwanda, Tanzania, and Zambia)  
31  
32 and found that none had any data related to national financial allocations to surgery or actual  
33  
34 expenditures, while only the Nigeria and Rwanda NSOAPs had information on hospital  
35  
36 allocations to surgery. This finding is neither new nor limited to SSA: Meara et al (2015)  
37  
38 reviewed 958 national health accounts published between 1996 and 2010 in LIMCs and  
39  
40 reported that only Georgia and Kyrgyzstan routinely reported expenditures on surgery;<sup>2</sup> and a  
41  
42 2015 systematic review of UHC programmes in LIMCs showed surgeries were systematically  
43  
44 excluded from national UHC packages.<sup>84</sup> This limited evidence shows the lack of substantial  
45  
46 progress, five years after the LCGS recommendations, suggesting minimal scholarly interest  
47  
48 in the subject. The upward trend recorded in the volume of studies from 2015 is nonetheless  
49  
50 welcome and should be sustained and intensified.  
51  
52  
53  
54  
55

56  
57 Poor pooling functions across SSA mean that access to surgical care still correlates strongly  
58  
59 with socioeconomic status, resulting, among the poor, in disinclination to seek care,  
60

1  
2  
3 catastrophic expenditures for those who dare to seek care, disruptions in care stream, and  
4 consequential inequities in health outcomes affecting especially the poor. The successes  
5 recorded with CHIF in Rwanda<sup>85</sup> and NHIF in Ghana<sup>86</sup> might serve as examples to be built  
6 upon by other countries. Meanwhile, as laudable as health insurance and UPF interventions  
7 are, the most important message from this study is that just removing or subsidizing user fees  
8 is not enough. Aside from the associated technical complexities that must be addressed,  
9 numerous other non-medical cost elements hampering universal access to surgical care remain,  
10 including transport, food, accommodation, and loss of earnings. As such, even if all the direct  
11 medical costs were covered at the national or facility level, some patients would remain simply  
12 too poor to obtain even “free” surgical care.<sup>87</sup> The particular contexts of low-income countries  
13 ought to be understood and addressed appropriately using more comprehensive policy designs.

14  
15  
16  
17  
18  
19  
20  
21  
22  
23  
24  
25  
26  
27  
28  
29 This study reveals important priorities for future research. First, there is need to explore the  
30 current national level mobilization and allocation patterns and track the available resources  
31 throughout the system to inform best policy directions.<sup>7</sup> Second, numerous studies have  
32 established the vulnerabilities faced by the poor due to inadequacies in protection measures,  
33 but few have explored optimal financial protection strategies given the socioeconomic realities  
34 in SSA.<sup>76 88</sup> More evidence in this regard will aid contextualised policy formulation. Further,  
35 the literature is particularly scanty on the purchasing aspects of surgical services: a deeper  
36 understanding of interactions between hospital reimbursement patterns and personnel  
37 remuneration systems on one hand and surgical service delivery on the other hand will  
38 engender value-based purchasing mechanisms and ensure maximization of surgical output with  
39 the limited available resources.<sup>2</sup> Lastly, as national and subnational governments in SSA  
40 continue to pursue free obstetric care policies, the literature remains divided on their exact  
41 impacts on CS rates. More rigorous studies are recommended to resolve the conflicts and  
42 explore the factors that may account for different outcomes in different countries.

1  
2  
3 Wide variations found in approaches to the estimation of catastrophic expenditures across the  
4 articles call for a special note. Health expenses are described as “catastrophic” if they exceed  
5 a certain threshold proportion of household income/expenditure or capacity to pay,<sup>89</sup> but lack  
6 of unanimity remains in the thresholds applied.<sup>40 89</sup> In addition, cost elements considered in the  
7 calculations also differed, with some covering only direct medical cost,<sup>38 62</sup> others including  
8 direct non-medical costs,<sup>27 65</sup> and still others extending to indirect costs.<sup>39 51 90</sup> Moreover,  
9 definitions of direct and indirect costs were inconsistent. Given the cardinal position this metric  
10 has assumed in financial protection analyses, uniformity in approaches is particularly  
11 imperative, and to achieve this, we advocate adherence to the definition and methodology  
12 adopted by the WHO and the World Bank for indicator 3.8.2 of the Sustainable Development  
13 Goals (SDGs) which monitors the financial protection dimension of universal health  
14 coverage.<sup>91 92</sup>

## 34 **Conclusion**

35  
36  
37 This study has provided a situational analysis of financing of surgery and anaesthesia in SSA  
38 while summarising the current knowledge on the subject. The resources available for surgery  
39 are limited due in part to the neglect of surgery in national priorities, making it difficult for  
40 hospitals to provide the full package of surgical services. Surgery services are unaffordable for  
41 the great majority of populations, resulting in financial catastrophes and/ or impoverishments.  
42 Findings in this review could guide national policy makers in SSA, especially those  
43 implementing or developing NSOAPs, in adopting more comprehensive and inclusive  
44 measures to enhance access to SOA services, while steering research towards critical  
45 unanswered questions.

## 58 **Author Contributions**



1  
2  
3 MI and LB conceived the study. MI, EA and LB designed the study, conducted the search and  
4 analysed the data. MI and EA drafted the first manuscript. All authors contributed to data  
5 interpretation, and critically reviewed and edited the first draft. All authors read and approved  
6 the final manuscript. LB supervised the study.  
7  
8  
9  
10  
11  
12

### 13 **Acknowledgements**

14  
15 We are grateful to Dr Henk Broekhuizen (Department of Social Sciences, Wageningen  
16 University) for his help in the conceptualization of the study. The authors also wish to  
17 appreciate information specialists Elmie Peters and Dr On Ying Chan of Radboud University  
18 Medical Library, and Paul Murphy of Royal College of Surgeons in Ireland (RCSI) Library,  
19 for their technical assistance in the development and execution of the literature search strategy;  
20 and Jos Peters of Radboud University Medical Library who assisted in the acquisition of the  
21 full texts of the articles.  
22  
23  
24  
25  
26  
27  
28  
29  
30  
31  
32  
33

### 34 **Competing Interests**

35  
36 The authors declare no competing interests  
37

### 38 **Funding**

39  
40 This work was supported by European Commission's Horizon 2020 Framework Programme,  
41 under grant agreement no: 733391, as part of the Scaling up Safe Surgery for District and Rural  
42 Populations in Africa (SURG-Africa) project.  
43  
44  
45  
46

### 47 **Ethical Approval**

48  
49 Not Applicable  
50  
51

### 52 **Data Availability Statement**

53  
54 Extra data is available by emailing author MI ([Martilord.ifeanyichi@radboudumc.nl](mailto:Martilord.ifeanyichi@radboudumc.nl))  
55  
56  
57

### 58 **References**

59  
60

1. Alkire BC, Raykar NP, Shrimme MG, et al. Global access to surgical care: A modelling study. *The Lancet Global Health* 2015;3(6):e316-e23. doi: <http://dx.doi.org/10.1016/S2214-109X%2815%2970115-4>
2. Meara JG, Leather AJM, Hagander L, et al. Global Surgery 2030: Evidence and solutions for achieving health, welfare, and economic development. *The Lancet* 2015;386(9993):569-624. doi: <http://dx.doi.org/10.1016/S0140-6736%2815%2960160-X>
3. WHO. Health systems: improving performance: World Health Organization; 2000 [Available from: <https://www.who.int/whr/2000/en/> accessed 5th June 2020.
4. Evans DB, Etienne C. Health systems financing and the path to universal coverage: SciELO Public Health, 2010.
5. World Development Indicators: The World Bank; 2020 [Available from: <https://databank.worldbank.org/source/world-development-indicators> accessed December 20 2020.
6. Truche P, Shoman H, Reddy CL, et al. Globalization of national surgical, obstetric and anesthesia plans: The critical link between health policy and action in global surgery. *Globalization and Health* 2020;16(1) doi: <http://dx.doi.org/10.1186/s12992-019-0531-5>
7. WHO. Situation analysis of the health sector: World Health Organisation; 2016 [Available from: <https://www.who.int/healthsystems/publications/nhpsp-handbook-ch3/en/> accessed June 15 2020.
8. Nyberger K, Jumbam DT, Dahm J, et al. The Situation of Safe Surgery and Anaesthesia in Tanzania: A Systematic Review. *World journal of surgery* 2019;43(1):24-35. doi: <http://dx.doi.org/10.1007/s00268-018-4767-7>
9. O'Malley L. Scoping studies: towards a methodological framework AU-Arksey, Hilary. *Int J Soc Res Methodol* 2005;8:19-32.
10. Levac D, Colquhoun H, O'Brien KK. Scoping studies: advancing the methodology. *Implement Sci* 2010;5(1):69.
11. Micah Peters CG, Patricia McInerney, Zachary Munn, Andrea Tricco, Hanan Khalil. Scoping Reviews. In: Aromataris E MZ, ed. JBI Manual for Evidence Synthesis, JBI, 2020 Available from <https://synthesismanual.jbiglobal> <https://doi.org/1046658/JBIMES-20-122020>.
12. Mourad Ouzzani HH, Zbys Fedorowicz, and Ahmed Elmagarmid. Rayyan — a web and mobile app for systematic reviews. 2016 [Available from: <https://rayyan.qcri.org/welcome> accessed July 30 2020.
13. Moher D, Liberati A, Tetzlaff J, et al. Preferred reporting items for systematic reviews and meta-analyses: the PRISMA statement. *PLoS Med* 2009;6(7):e1000097.
14. Tricco AC, Lillie E, Zarin W, et al. PRISMA extension for scoping reviews (PRISMA-ScR): checklist and explanation. *Ann Intern Med* 2018;169(7):467-73.
15. Citron I, Chokocho L, Lavy C. Prioritisation of Surgery in the National Health Strategic Plans of Africa: A Systematic Review. *World journal of surgery* 2016;40(4):779-83. doi: <http://dx.doi.org/10.1007/s00268-015-3333-9>
16. Iverson KR, Garringer K, Ahearn O, et al. Mixed-methods assessment of surgical capacity in two regions in Ethiopia. *British Journal of Surgery* 2019;106(2):e81-e90. doi: <http://dx.doi.org/10.1002/bjs.11032>
17. DeGregorio G, Manga S, Kiyang E, et al. Implementing a Fee-for-Service Cervical Cancer Screening and Treatment Program in Cameroon: Challenges and Opportunities. *Oncologist* 2017;22(7):850-59. doi: 10.1634/theoncologist.2016-0383 [published Online First: 2017/05/26]
18. Rakotondrajoa P, Rakotomamonjy T, Baptiste RJ, et al. Achieving self-sustainability of service delivery in an eye care program in Madagascar using time-driven activity based costing. *BMC health services research* 2020;20(1):205. doi: <http://dx.doi.org/10.1186/s12913-020-05074-z>

19. Ekenze SO, Jac-Okereke CA, Nwankwo EP. Funding paediatric surgery procedures in sub-Saharan Africa. *Malawi medical journal : the journal of Medical Association of Malawi* 2019;31(3):233-40. doi: <http://dx.doi.org/10.4314/mmj.v31i3.13>
20. Cornelissen D, Mwapasa G, Gajewski J, et al. The Cost of Providing District-Level Surgery in Malawi. *World journal of surgery* 2018;42(1):46-53. doi: <http://dx.doi.org/10.1007/s00268-017-4166-5>
21. Kruk ME, Wladis A, Mbembati N, et al. Human resource and funding constraints for essential surgery in district hospitals in africa: A retrospective cross-sectional survey. *PLoS Medicine* 2010;7(3):1-11. doi: <http://dx.doi.org/10.1371/journal.pmed.1000242>
22. Sion M, Rajan D, Kalambay H, et al. A resource planning analysis of district hospital surgical services in the Democratic Republic of the Congo. *Global health, science and practice* 2015;3(1):56-70. doi: <http://dx.doi.org/10.9745/GHSP-D-14-00165>
23. Adoga A, Nimkur T, Silas O. Chronic suppurative otitis media: Socio-economic implications in a tertiary hospital in Northern Nigeria. *Pan African Medical Journal* 2010;4(no pagination)
24. Nnabugwu II, Ugwumba FO, Ede JK. Second-phase delay in accessing major elective surgeries from a public tertiary health institution in Nigeria: the role of financial constraints. *International Journal of Medicine and Health Development* 2019;24(2):89-94. doi: [http://dx.doi.org/10.4103/ijmh.IJMH\\_16\\_19](http://dx.doi.org/10.4103/ijmh.IJMH_16_19)
25. Obembe T, Fonn S. Affording unavoidable emergency surgical care - The lived experiences and payment coping strategies of households in Ibadan metropolis, Southwestern Nigeria. *PLoS ONE* 2020;15(5) doi: <http://dx.doi.org/10.1371/journal.pone.0232882>
26. Ugalahi MO, Olusanya BA, Fagbemi OO, et al. Delays in uptake of surgery for childhood cataract at a child eye health tertiary facility in sub-Saharan Africa. *European Journal of Ophthalmology* 2020;30(2):280-83. doi: <http://dx.doi.org/10.1177/1120672119827770>
27. Urua U, Osungbade K, Obembe T, et al. A cost analysis of road traffic injuries in a tertiary hospital in south-west Nigeria. *International journal of injury control and safety promotion* 2017;24(4):510-18. doi: <http://dx.doi.org/10.1080/17457300.2016.1278238>
28. Frimpong-Boateng K, Edwin F. Surgical leadership in Africa - challenges and opportunities. *Innov Surg Sci* 2019;4(2):59-64. doi: 10.1515/iss-2018-0036 [published Online First: 2019/10/04]
29. Reddy CL, Peters AW, Jumbam DT, et al. Innovative financing to fund surgical systems and expand surgical care in low-income and middle-income countries. *BMJ global health* 2020;5(6):e002375.
30. Butler EK, Tran TM, Fuller AT, et al. Pilot study of a population-based survey to assess the prevalence of surgical conditions in Uganda. *Surgery (United States)* 2015;158(3):764-72. doi: <http://dx.doi.org/10.1016/j.surg.2015.05.011>
31. Bouglouga O, Lawson-Ananissoh LM, Bagny A, et al. [Stomach cancer: Epidemiological, clinical and histological aspects at the Lome Campus teaching hospital (Togo)]. *Med Sante Trop* 2015;25(1):65-8. doi: 10.1684/mst.2014.0415 [published Online First: 2015/03/20]
32. Lerman BJ, Alsan M, Chia NJ, et al. Beyond Infrastructure: Understanding Why Patients Decline Surgery in the Developing World. *Annals of Surgery* 2017;266(6):975-80. doi: <http://dx.doi.org/10.1097/SLA.0000000000002002>
33. Onyebuchi AK, Lawani LO, Nkwo PO, et al. Determinants of decision-to-intervention time in the management and therapeutic outcome of emergency gynecological surgeries in south east Nigeria. *Therapeutics and Clinical Risk Management* 2014;10(1):577-82. doi: <http://dx.doi.org/10.2147/TCRM.S66897>
34. Lankoande M, Bonkougou P, Traore SIS, et al. Cancellation of elective surgical procedures in the university teaching hospital center yalgado ouedraogo in Burkina Faso: Incidence, reasons and proposals for improvement. *Southern African Journal of Anaesthesia and Analgesia* 2016;22(5):140-44. doi: <http://dx.doi.org/10.1080/22201181.2016.1226539>

- 1  
2  
3 35. Takongmo S, Yomi J, Guifo ML, et al. Neoadjuvant chemotherapy in the treatment of advanced  
4 and inflammatory breast cancer in Yaounde (Cameroon). [French]. *Journal Africain du Cancer*  
5 2011;3(3):175-79. doi: <http://dx.doi.org/10.1007/s12558-011-0165-x>
- 6  
7 36. Aboobaker S, Courtright P. Barriers to cataract surgery in Africa: A systematic review. *Middle East*  
8 *African Journal of Ophthalmology* 2016;23(1):145-49. doi: [http://dx.doi.org/10.4103/0974-](http://dx.doi.org/10.4103/0974-9233.164615)  
9 [9233.164615](http://dx.doi.org/10.4103/0974-9233.164615)
- 10  
11 37. Stanton MC, Best A, Cliffe M, et al. Situational analysis of lymphatic filariasis morbidity in Ahanta  
12 West District of Ghana. *Tropical Medicine and International Health* 2016;21(2):236-44. doi:  
13 <http://dx.doi.org/10.1111/tmi.12643>
- 14  
15 38. Shrimel MG, Dare A, Alkire BC, et al. A global country-level comparison of the financial burden of  
16 surgery. *Br J Surg* 2016;103(11):1453-61. doi: 10.1002/bjs.10249 [published Online First:  
17 2016/07/19]
- 18  
19 39. Bijlmaekers L, Wientjes M, Mwapasa G, et al. Out-of-pocket payments and catastrophic household  
20 expenditure to access essential surgery in Malawi - A cross-sectional patient survey. *Annals*  
21 *of Medicine and Surgery* 2019;43:85-90. doi: <http://dx.doi.org/10.1016/j.amsu.2019.06.003>
- 22  
23 40. Arsenault C, Fournier P, Philibert A, et al. Emergency obstetric care in Mali: Catastrophic  
24 spending and its impoverishing effects on households. *Bulletin of the World Health*  
25 *Organization* 2013;91(3):207-16. doi: <http://dx.doi.org/10.2471/BLT.12.108969>
- 26  
27 41. Nnabugwu II, Nwankwor C, Ugwumba F. Gaining access to major elective surgeries in a public  
28 tertiary health institution in southeast Nigeria: Evaluating household payment coping  
29 strategies. *Annals of African Surgery* 2019;16(2):69-74. doi:  
30 <http://dx.doi.org/10.4314/aas.v16i2.6>
- 31  
32 42. Anderson GA, Ilcisin L, Kayima P, et al. Out-of-pocket payment for surgery in Uganda: The rate of  
33 impoverishing and catastrophic expenditure at a government hospital. *PLoS ONE*  
34 2017;12(10) doi: <http://dx.doi.org/10.1371/journal.pone.0187293>
- 35  
36 43. Ibrahim N, Ramke J, Pozo-Martin F, et al. Willingness to pay for cataract surgery is much lower  
37 than actual costs in Zamfara state, northern Nigeria. *Ophthalmic Epidemiology*  
38 2018;25(3):227-33. doi: <http://dx.doi.org/10.1080/09286586.2017.1408845>
- 39  
40 44. Dean WH, Sherwin JC, Kumwenda S, et al. Willingness to pay for cataract surgery in post-  
41 operative cataract patients in rural Malawi. *Ophthalmic Epidemiol* 2012;19(5):265-71. doi:  
42 10.3109/09286586.2012.708085 [published Online First: 2012/09/18]
- 43  
44 45. Dim CC, Onyedum CC, Dim NR, et al. Cervical Cancer Screening among HIV-Positive Women in  
45 Nigeria: An Assessment of Use and Willingness to Pay in the Absence of Donor Support. *J Int*  
46 *Assoc Provid AIDS Care* 2015;14(3):241-4. doi: 10.1177/2325957413488191 [published  
47 Online First: 2013/06/01]
- 48  
49 46. Groen RS, Kamara TB, Nwomeh BC, et al. Free health care for under 5 year olds increases access  
50 to surgical care in Sierra Leone: an analysis of case load and patient characteristics. *World J*  
51 *Surg* 2013;37(6):1216-9. doi: 10.1007/s00268-013-1993-x [published Online First:  
52 2013/03/23]
- 53  
54 47. McKinnon B, Harper S, Kaufman JS, et al. Removing user fees for facility-based delivery services:  
55 a difference-in-differences evaluation from ten sub-Saharan African countries. *Health Policy*  
56 *Plan* 2015;30(4):432-41. doi: 10.1093/heapol/czu027 [published Online First: 2014/05/13]
- 57  
58 48. Witter S, Boukhalfa C, Cresswell JA, et al. Cost and impact of policies to remove and reduce fees  
59 for obstetric care in Benin, Burkina Faso, Mali and Morocco. *International Journal for Equity*  
60 *in Health* 2016;15(1) doi: <http://dx.doi.org/10.1186/s12939-016-0412-y>
- 61  
62 49. Witter S, Dieng T, Mbengue D, et al. The national free delivery and caesarean policy in Senegal:  
63 evaluating process and outcomes. *Health policy and planning* 2010;25(5):384-92.
- 64  
65 50. Witter S, Khalid Mousa K, Abdel-Rahman ME, et al. Removal of user fees for caesareans and  
66 under-fives in northern Sudan: a review of policy implementation and effectiveness. *The*  
67 *International journal of health planning and management* 2013;28(1):e95-e120. doi:  
68 <http://dx.doi.org/10.1002/hpm.2146>

- 1  
2  
3  
4  
5  
6  
7  
8  
9  
10  
11  
12  
13  
14  
15  
16  
17  
18  
19  
20  
21  
22  
23  
24  
25  
26  
27  
28  
29  
30  
31  
32  
33  
34  
35  
36  
37  
38  
39  
40  
41  
42  
43  
44  
45  
46  
47  
48  
49  
50  
51  
52  
53  
54  
55  
56  
57  
58  
59  
60
51. MacKinnon N, St-Louis E, Yousef Y, et al. Out-of-Pocket and Catastrophic Expenses Incurred by Seeking Pediatric and Adult Surgical Care at a Public, Tertiary Care Centre in Uganda. *World journal of surgery* 2018;42(11):3520-27. doi: <http://dx.doi.org/10.1007/s00268-018-4691-x>
  52. Ouedraogo TL, Kpozehouen A, Glegle-Hessou Y, et al. [Evaluation of free cesarean sections in Benin]. [French]. *Sante publique (Vandoeuvre-les-Nancy, France)* 2013;25(4):507-15.
  53. Mongbo V, Ouendo EM, De Brouwere V, et al. Quality of caesarean delivery: A cross-sectional study in 12 hospitals in Benin. *Revue d'Epidemiologie et de Sante Publique* 2016;64(4):281-93. doi: <http://dx.doi.org/10.1016/j.respe.2016.02.009>
  54. Lange IL, Kanhonou L, Goufodji S, et al. The costs of 'free': Experiences of facility-based childbirth after Benin's caesarean section exemption policy. *Social Science and Medicine* 2016;168:53-62. doi: <http://dx.doi.org/10.1016/j.socscimed.2016.09.008>
  55. Keya KT, Sripad P, Nwala E, et al. "Poverty is the big thing": Exploring financial, transportation, and opportunity costs associated with fistula management and repair in Nigeria and Uganda. *International Journal for Equity in Health* 2018;17(1) doi: <http://dx.doi.org/10.1186/s12939-018-0777-1>
  56. Dankwah E, Kirychuk S, Zeng W, et al. Socioeconomic inequalities in the use of caesarean section delivery in Ghana: A cross-sectional study using nationally representative data. *International Journal for Equity in Health* 2019;18(1) doi: <http://dx.doi.org/10.1186/s12939-019-1063-6>
  57. Leone T, Cetorelli V, Neal S, et al. Financial accessibility and user fee reforms for maternal healthcare in five sub-Saharan countries: A quasi-experimental analysis. *BMJ Open* 2016;6(1) doi: <http://dx.doi.org/10.1136/bmjopen-2015-009692>
  58. El-Khoury M, Hatt L, Gandaho T. User fee exemptions and equity in access to caesarean sections: An analysis of patient survey data in Mali. *International Journal for Equity in Health* 2012;11(1) doi: <http://dx.doi.org/10.1186/1475-9276-11-49>
  59. Ravit M, Audibert M, Ridde V, et al. Do free caesarean section policies increase inequalities in Benin and Mali? *International Journal for Equity in Health* 2018;17(1) doi: <http://dx.doi.org/10.1186/s12939-018-0789-x>
  60. Toure L. User fee exemption policies in Mali: sustainability jeopardized by the malfunctioning of the health system. *BMC health services research* 2015;15(Supplement 3):S8. doi: <http://dx.doi.org/10.1186/1472-6963-15-S3-S8>
  61. Ridde V, Richard F, Bicaba A, et al. The national subsidy for deliveries and emergency obstetric care in Burkina Faso. *Health Policy Plan* 2011;26 Suppl 2:ii30-40. doi: 10.1093/heapol/czr060 [published Online First: 2011/11/02]
  62. Seyi-Olajide JO, Anderson J, Enivwaene AO, et al. Catastrophic Healthcare Expenditure from Typhoid Perforation in Children in Nigeria. *Surgical infections* 2020;18 doi: <http://dx.doi.org/10.1089/sur.2020.134>
  63. Coulibaly Y, Togo A, Keita M, et al. Cost of care for pediatric patients undergoing surgery at the University Hospital Gabriel Toure. [French]. *Medecine d'Afrique Noire* 2010;57(4):198-202.
  64. Mwandri M, Hardcastle TC, Sawe H, et al. Trauma burden, patient demographics and care-process in major hospitals in Tanzania: A needs assessment for improving healthcare resource management. *African Journal of Emergency Medicine* 2020 doi: <http://dx.doi.org/10.1016/j.afjem.2020.01.010>
  65. Honda A, Randaoharison PG, Matsui M. Affordability of emergency obstetric and neonatal care at public hospitals in Madagascar. *Reproductive Health Matters* 2011;19(37):10-20. doi: <http://dx.doi.org/10.1016/S0968-8080%2811%2937559-3>
  66. Mostert S, Njuguna F, van de Ven PM, et al. Influence of health-insurance access and hospital retention policies on childhood cancer treatment in Kenya. *Pediatric Blood and Cancer* 2014;61(5):913-18. doi: <http://dx.doi.org/10.1002/pbc.24896>
  67. Blankson PK, Nonvignon J, Aryeetey G, et al. Injuries and their related household costs in a tertiary hospital in Ghana. *African Journal of Emergency Medicine* 2020 doi: <http://dx.doi.org/10.1016/j.afjem.2020.04.004>

- 1  
2  
3  
4  
5  
6  
7  
8  
9  
10  
11  
12  
13  
14  
15  
16  
17  
18  
19  
20  
21  
22  
23  
24  
25  
26  
27  
28  
29  
30  
31  
32  
33  
34  
35  
36  
37  
38  
39  
40  
41  
42  
43  
44  
45  
46  
47  
48  
49  
50  
51  
52  
53  
54  
55  
56  
57  
58  
59  
60
68. Rickard JL, Ngarambe C, Ndayizeye L, et al. Risk of Catastrophic Health Expenditure in Rwandan Surgical Patients with Peritonitis. *World journal of surgery* 2018;42(6):1603-09. doi: <http://dx.doi.org/10.1007/s00268-017-4368-x>
69. Adeniran AS, Aun II, Fawole AA, et al. Comparative analysis of caesarean delivery among out-of-pocket and health insurance clients in Ilorin, Nigeria. *The Nigerian postgraduate medical journal* 2020;27(2):108-14. doi: [http://dx.doi.org/10.4103/npmj.npmj\\_181\\_19](http://dx.doi.org/10.4103/npmj.npmj_181_19)
70. Rajaguru PP, Jusabani MA, Massawe H, et al. Understanding surgical care delivery in Sub-Saharan Africa: a cross-sectional analysis of surgical volume, operations, and financing at a tertiary referral hospital in rural Tanzania. *Glob Health Res Policy* 2019;4:30. doi: 10.1186/s41256-019-0122-2 [published Online First: 2019/11/02]
71. Gichuru S, Kedera T, Wanjeri J, et al. Predictors of post-mastectomy breast reconstruction in Kenya. *Annals of African Surgery* 2020;17(1):16-20. doi: <http://dx.doi.org/10.4314/aas.v17i1.5>
72. Okoroh J, Sarpong DOB, Essoun S, et al. Does insurance protect individuals from catastrophic payments for surgical care? An analysis of Ghana's National Health Insurance Scheme at Korle-Bu teaching Hospital. *BMC health services research* 2020;20(1):45. doi: <http://dx.doi.org/10.1186/s12913-020-4887-2>
73. Bonfrer I, Breebaart L, De Poel EV. The effects of Ghana's national health insurance scheme on maternal and infant health care utilization. *PLoS ONE* 2016;11(11) doi: <http://dx.doi.org/10.1371/journal.pone.0165623>
74. Stewart BT, Gyedu A, Abantanga F, et al. Barriers to essential surgical care in low- and middle-income countries: a pilot study of a comprehensive assessment tool in Ghana. *World Journal of Surgery* 2015;39(11):2613-21. doi: <http://dx.doi.org/10.1007/s00268-015-3168-4>
75. Dienye PO, Brisibe SF, Eke R. Sources of healthcare financing among surgical patients in a rural Niger Delta practice in Nigeria. *Rural and remote health* 2011;11:1577.
76. Shrimel MG, Sekidde S, Linden A, et al. Sustainable development in surgery: The health, poverty, and equity impacts of charitable surgery in Uganda. *PLoS ONE* 2016;11(12) doi: <http://dx.doi.org/10.1371/journal.pone.0168867>
77. Shrimel MG, Verguet S, Johansson KA, et al. Task-sharing or public finance for expanding surgical access in rural Ethiopia: an extended cost-effectiveness analysis: Disease control priorities, third edition: Volume 1. Essential surgery; 2015. :339-352. many ref. 2015.
78. Holoyda KA, Farhat B, Lalonde DH, et al. Creating an Outpatient, Local Anesthetic Hand Operating Room in a Resource-Constrained Ghanaian Hospital Builds Surgical Capacity and Financial Stability. *Annals of plastic surgery* 2020;84(4):385-89. doi: <http://dx.doi.org/10.1097/SAP.0000000000002196>
79. Gnassingbe K, Tekou H, Da Silva-Anoma S, et al. The paediatric surgeon and his working conditions in Francophone sub-Saharan Africa. *African Journal of Paediatric Surgery* 2011;8(3):298-300. doi: <http://dx.doi.org/10.4103/0189-6725.91677>
80. Meda IB, Kouanda S, Dumont A, et al. Effect of a prospective payment method for health facilities on direct medical expenditures in a low-resource setting: a paired pre-post study. *Health policy and planning* 2020;04 doi: <http://dx.doi.org/10.1093/heapol/czaa039>
81. Janssen W, de Dieu Ngirabega J, Matungwa M, et al. Improving quality through performance-based financing in district hospitals in Rwanda between 2006 and 2010: A 5-year experience. *Tropical Doctor* 2015;45(1):27-35. doi: <http://dx.doi.org/10.1177/0049475514554481>
82. Citron I, Jumbam D, Dahm J, et al. Towards equitable surgical systems: development and outcomes of a national surgical, obstetric and anaesthesia plan in Tanzania. *BMJ Glob Health* 2019;4(2):e001282. doi: 10.1136/bmjgh-2018-001282 [published Online First: 2019/05/30]
83. Sonderman K, Citron I, Mukhopadhyay S, et al. Framework for developing a national surgical, obstetric and anaesthesia plan. *BJS open* 2019

- 1  
2  
3  
4  
5  
6  
7  
8  
9  
10  
11  
12  
13  
14  
15  
16  
17  
18  
19  
20  
21  
22  
23  
24  
25  
26  
27  
28  
29  
30  
31  
32  
33  
34  
35  
36  
37  
38  
39  
40  
41  
42  
43  
44  
45  
46  
47  
48  
49  
50  
51  
52  
53  
54  
55  
56  
57  
58  
59  
60
84. Okoroh JS, Chia V, Oliver EA, et al. Strengthening health systems of developing countries: inclusion of surgery in universal health coverage. *World journal of surgery* 2015;39(8):1867-74.
85. Saksena P, Antunes AF, Xu K, et al. Mutual health insurance in Rwanda: evidence on access to care and financial risk protection. *Health Policy* 2011;99(3):203-9. doi: 10.1016/j.healthpol.2010.09.009 [published Online First: 2010/10/23]
86. Mensah J, Oppong JR, Schmidt CM. Ghana's National Health Insurance Scheme in the context of the health MDGs: an empirical evaluation using propensity score matching. *Health Econ* 2010;19 Suppl:95-106. doi: 10.1002/hec.1633 [published Online First: 2010/08/24]
87. Awori J, Strahle J, Okechi H, et al. Implications of patient-borne costs associated with pediatric neurosurgical care in eastern Africa. *Journal of Neurosurgery: Pediatrics* 2016;18(1):116-24. doi: <http://dx.doi.org/10.3171/2015.11.PEDS15445>
88. Shrimme MG, Verguet S, Johansson KA, et al. Task-Sharing or Public Finance for Expanding Surgical Access in Rural Ethiopia: An Extended Cost-Effectiveness Analysis. In: Debas HT, Donkor P, Gawande A, et al., eds. *Essential Surgery: Disease Control Priorities, Third Edition (Volume 1)*. Washington (DC): The International Bank for Reconstruction and Development / The World Bank
- © 2015 International Bank for Reconstruction and Development / The World Bank. 2015.
89. Xu K, Evans DB, Kawabata K, et al. Household catastrophic health expenditure: a multicountry analysis. *The lancet* 2003;362(9378):111-17.
90. Yap A, Cheung M, Kakembo N, et al. From procedure to poverty: out-of-pocket and catastrophic expenditure for pediatric surgery in Uganda. *Journal of Surgical Research* 2018;232:484-91. doi: <http://dx.doi.org/10.1016/j.jss.2018.05.077>
91. Tracking universal health coverage: 2017 global monitoring report. Geneva: World Health Organisation and International Bank for Reconstruction and Development/TheWorld Bank, 2017.
92. Monitoring Sustainable Development Goals - Indicator 3.8.2: World Health Organisation; 2020 [Available from: [https://www.who.int/health\\_financing/topics/financial-protection/monitoring-sdg/en/](https://www.who.int/health_financing/topics/financial-protection/monitoring-sdg/en/) accessed December 17 2020.

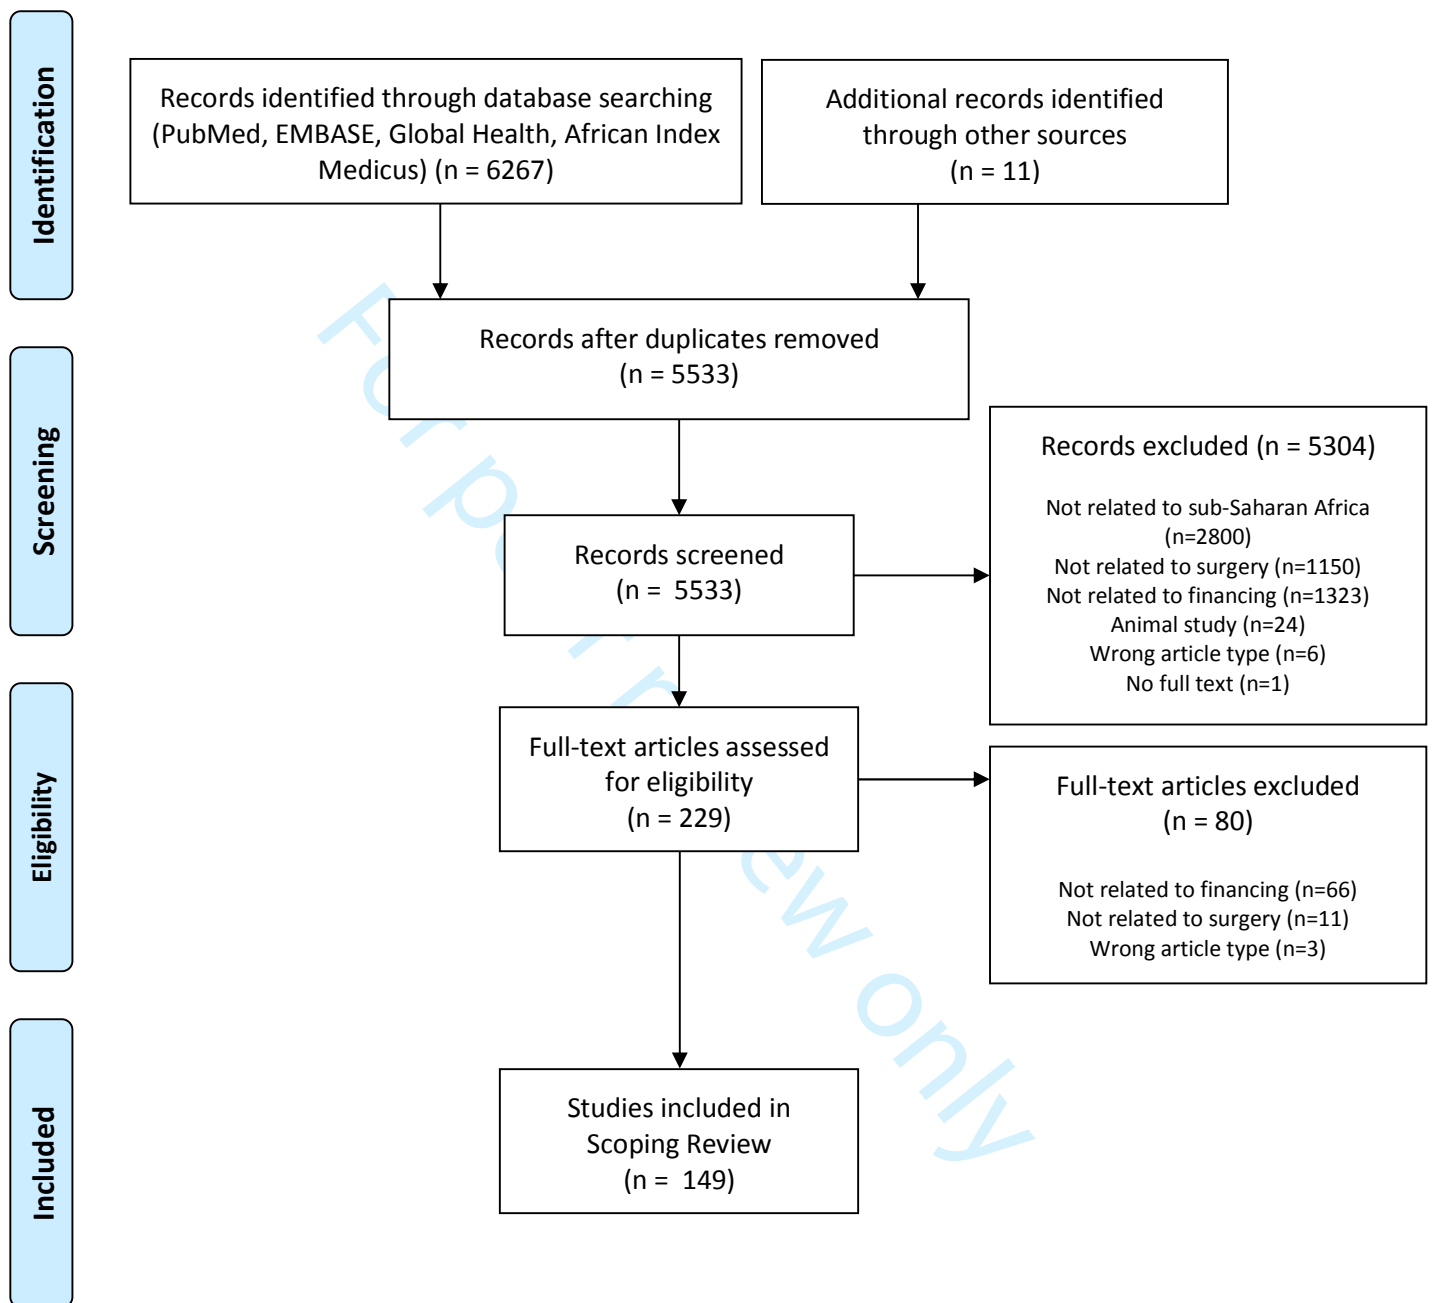



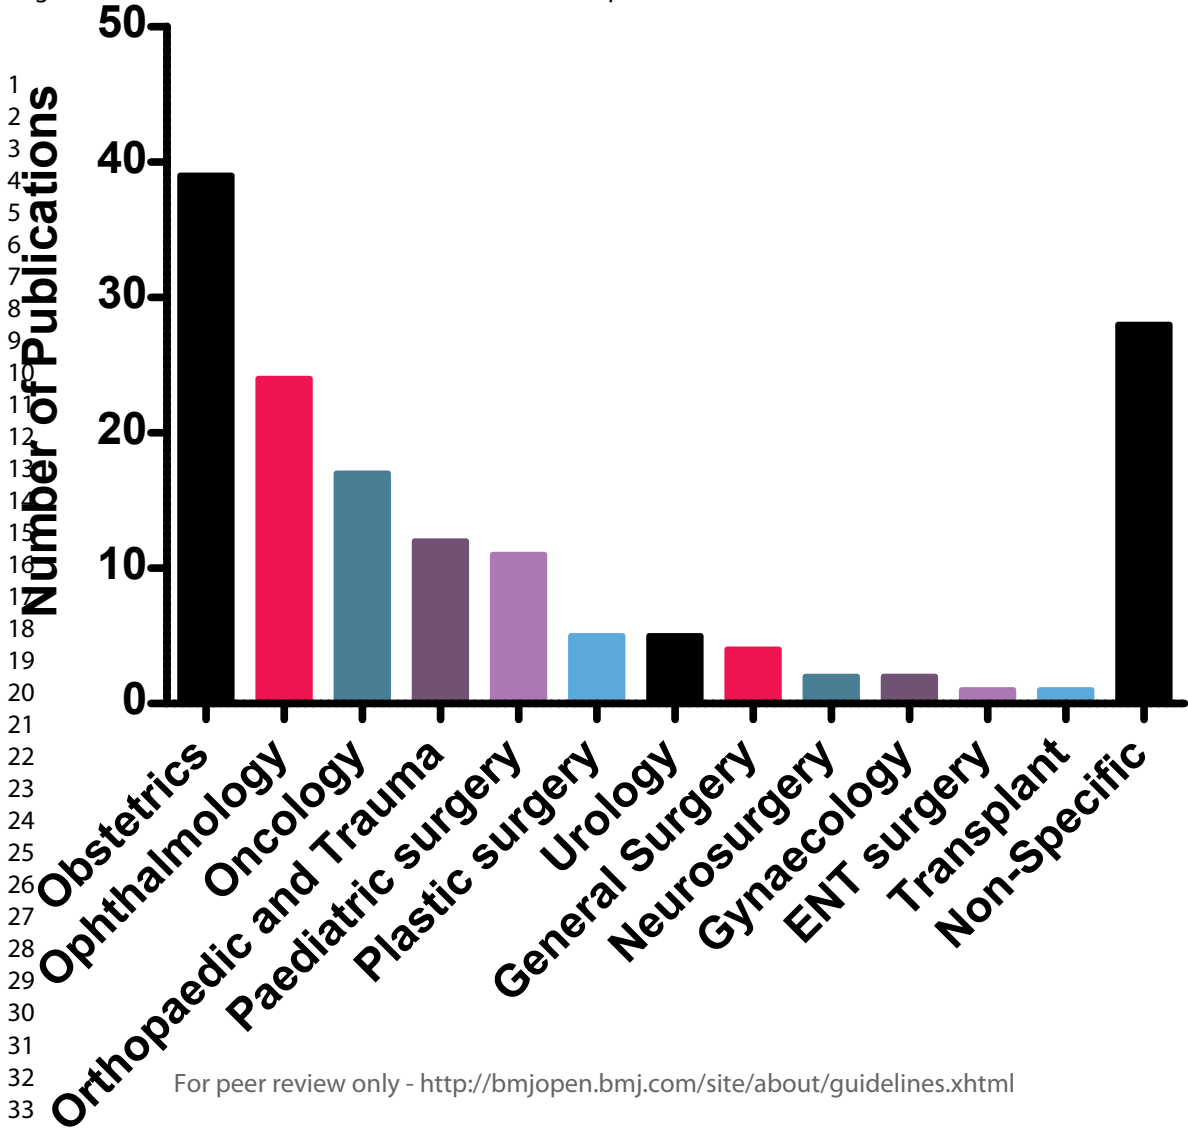

1  
2  
3 **S1: Search Query**  
4

5 **1. PUBMED**  
6

|                                                                                                                                                                                                                                                                                                                                                                                                                                                                                                                                                                                                                                                                                                                                                                                                                                                                                                                                                                                                                                                                                                                                                                                                                                                                                                                                                                                                                                                                                                                                                                                                                                                                                                                                                                                                                                                                                                                                                                                                                                                                                                                                                                                                                                                                                                             |              |
|-------------------------------------------------------------------------------------------------------------------------------------------------------------------------------------------------------------------------------------------------------------------------------------------------------------------------------------------------------------------------------------------------------------------------------------------------------------------------------------------------------------------------------------------------------------------------------------------------------------------------------------------------------------------------------------------------------------------------------------------------------------------------------------------------------------------------------------------------------------------------------------------------------------------------------------------------------------------------------------------------------------------------------------------------------------------------------------------------------------------------------------------------------------------------------------------------------------------------------------------------------------------------------------------------------------------------------------------------------------------------------------------------------------------------------------------------------------------------------------------------------------------------------------------------------------------------------------------------------------------------------------------------------------------------------------------------------------------------------------------------------------------------------------------------------------------------------------------------------------------------------------------------------------------------------------------------------------------------------------------------------------------------------------------------------------------------------------------------------------------------------------------------------------------------------------------------------------------------------------------------------------------------------------------------------------|--------------|
| <p>7 ("Surgical Procedures, Operative"[Mesh] OR "surgery"[subheading] OR anaesthe*[tiab] OR<br/>8 anesthe*[tiab] OR anaesthesia[Mesh] OR "Specialties, Surgical"[Mesh] OR surger*[tiab] OR<br/>9 surgical[tiab]) AND ("Healthcare Financing"[Mesh] OR "Health Policy"[mesh] OR Universal<br/>10 Health Insurance[Mesh] OR "Health Planning"[Mesh] OR "Health Expenditures"[Mesh] OR<br/>11 Expenditure*[tiab] OR "Insurance, Health"[Mesh] OR Health Services/Economics[Mesh] OR<br/>12 Economics[Mesh:NoExp] OR Fund raising[Mesh] OR Health Care Costs[Mesh] OR Fees<br/>13 and Charges[mesh] OR "Financing, Personal"[Mesh] OR budgets[mesh] OR Health<br/>14 Services Accessibility/Economics[Mesh] OR health priorit*[tiab] OR Financ*[tiab] OR<br/>15 Revenue*[tiab] OR Charities/economics[mesh] OR "Universal Health Care"[tiab] OR<br/>16 Universal Health Coverage[tiab] OR "National Health Accounts"[tiab] OR payment*[tiab] OR<br/>17 Budget allocation*[tiab] OR Health Insurance[tiab]) AND ("Africa South of the Sahara"[Mesh]<br/>18 OR Africa*[tiab] OR Cameroon*[tiab] OR Central African Republic*[tiab] OR Congo*[tiab]<br/>19 OR Chad*[tiab] OR Democratic Republic of the Congo*[tiab] OR Equatorial Guinea*[tiab]<br/>20 OR Gabon*[tiab] OR Sao Tome and Principe*[tiab] OR Burundi*[tiab] OR Madagasca*[tiab]<br/>21 OR Comoros*[tiab] OR Mauriti*[tiab] OR Eritrea*[tiab] OR Ethiopia*[tiab] OR Kenya*[tiab]<br/>22 OR Rwanda*[tiab] OR Somalia*[tiab] OR South Sudan*[tiab] OR Sudan*[tiab] OR<br/>23 Tanzania*[tiab] OR Uganda*[tiab] OR Angola*[tiab] OR Botswana*[tiab] OR Lesotho*[tiab]<br/>24 OR Malawi*[tiab] OR Mozambi*[tiab] OR Namibia*[tiab] OR South Africa*[tiab] OR<br/>25 Swaziland*[tiab] OR Zambia*[tiab] OR Zimbabwe*[tiab] OR Benin*[tiab] OR Burkina<br/>26 Faso*[tiab] OR Cabo Verde*[tiab] OR Cote d'Ivoire*[tiab] OR Gambia*[tiab] OR Ghana*[tiab]<br/>27 OR Guinea*[tiab] OR Guinea-Bissau*[tiab] OR Liberia*[tiab] OR Mali*[tiab] OR<br/>28 Mauritania*[tiab] OR Niger*[tiab] OR Nigeria*[tiab] OR Senegal*[tiab] OR Sierra Leone*[tiab]<br/>29 OR Togo*[tiab] OR Eswatini*[tiab] OR Seychelles*[tiab] OR sub-Saharan*[tiab])<br/>30<br/>31<br/>32<br/>33<br/>34<br/>35<br/>36<br/>37<br/>38<br/>39 <b>Filters: from 2010 – 2020</b><br/>40<br/>41</p> | <p>2,849</p> |
|-------------------------------------------------------------------------------------------------------------------------------------------------------------------------------------------------------------------------------------------------------------------------------------------------------------------------------------------------------------------------------------------------------------------------------------------------------------------------------------------------------------------------------------------------------------------------------------------------------------------------------------------------------------------------------------------------------------------------------------------------------------------------------------------------------------------------------------------------------------------------------------------------------------------------------------------------------------------------------------------------------------------------------------------------------------------------------------------------------------------------------------------------------------------------------------------------------------------------------------------------------------------------------------------------------------------------------------------------------------------------------------------------------------------------------------------------------------------------------------------------------------------------------------------------------------------------------------------------------------------------------------------------------------------------------------------------------------------------------------------------------------------------------------------------------------------------------------------------------------------------------------------------------------------------------------------------------------------------------------------------------------------------------------------------------------------------------------------------------------------------------------------------------------------------------------------------------------------------------------------------------------------------------------------------------------|--------------|

42  
43  
44 **2. EMBASE**  
45

|                                                                                                                                                                                                                                                                                                                                                                                                                                                                                                                                                                                                                                                                                                      |              |
|------------------------------------------------------------------------------------------------------------------------------------------------------------------------------------------------------------------------------------------------------------------------------------------------------------------------------------------------------------------------------------------------------------------------------------------------------------------------------------------------------------------------------------------------------------------------------------------------------------------------------------------------------------------------------------------------------|--------------|
| <p>46 (exp surgery/ OR surgery.fs. OR exp obstetric operation/ OR exp anaesthesia/ OR<br/>47 surger*.ti,ab,kw. OR surgical.ti,ab,kw. OR anaesthe*.ti,ab,kw. OR anesthe*.ti,ab,kw.) AND<br/>48 (exp Health Care Cost/ OR Economics/ OR Universal Health Insurance/ OR exp Health<br/>49 Insurance/ OR exp Fee/ OR budget/ OR Funding/ OR value-based purchasing/ OR<br/>50 Universal Health Care/ OR Health Care Planning/ OR Social Welfare/ OR health<br/>51 priorit*.ti,ab,kw. OR Health Care Policy/ OR Financ*.ti,ab,kw. OR Universal Health<br/>52 Care.ti,ab,kw OR Universal Health Coverage.ti,ab,kw. OR budget allocation*.ti,ab,kw. OR<br/>53<br/>54<br/>55<br/>56<br/>57<br/>58<br/>59</p> | <p>3,661</p> |
|------------------------------------------------------------------------------------------------------------------------------------------------------------------------------------------------------------------------------------------------------------------------------------------------------------------------------------------------------------------------------------------------------------------------------------------------------------------------------------------------------------------------------------------------------------------------------------------------------------------------------------------------------------------------------------------------------|--------------|

payment\*.ti,ab,kw. OR Health Insurance.ti,ab,kw. OR National Health Account\*.ti,ab,kw. OR Revenue\*.ti,ab,kw. OR expenditure\*.ti,ab,kw.) AND (exp "Africa south of the Sahara"/ OR Cameroon\*.ti,ab,kw. OR Central African Republic\*.ti,ab,kw. OR Congo\*.ti,ab,kw. OR Chad\*.ti,ab,kw. OR Democratic Republic of the Congo\*.ti,ab,kw. OR Equatorial Guinea\*.ti,ab,kw. OR Gabon\*.ti,ab,kw. OR "Sao Tome and Principe\*".ti,ab,kw. OR Burundi\*.ti,ab,kw. OR Madagasca\*.ti,ab,kw. OR Comoros\*.ti,ab,kw. OR Mauriti\*.ti,ab,kw. OR Eritrea\*.ti,ab,kw. OR Ethiopia\*.ti,ab,kw. OR Kenya\*.ti,ab,kw. OR Rwanda\*.ti,ab,kw. OR Somalia\*.ti,ab,kw. OR South Sudan\*.ti,ab,kw. OR Sudan\*.ti,ab,kw. OR Tanzania\*.ti,ab,kw. OR Uganda\*.ti,ab,kw. OR Angola\*.ti,ab,kw. OR Botswana\*.ti,ab,kw. OR Lesotho\*.ti,ab,kw. OR Malawi\*.ti,ab,kw. OR Mozambi\*.ti,ab,kw. OR Namibia\*.ti,ab,kw. OR South Africa\*.ti,ab,kw. OR Swaziland\*.ti,ab,kw. OR Zambia\*.ti,ab,kw. OR Zimbabwe\*.ti,ab,kw. OR Benin\*.ti,ab,kw. OR Burkina Faso\*.ti,ab,kw. OR Cabo Verde\*.ti,ab,kw. OR Cote d'Ivoire\*.ti,ab,kw. OR Gambia\*.ti,ab,kw. OR Ghana\*.ti,ab,kw. OR Guinea\*.ti,ab,kw. OR Guinea-Bissau\*.ti,ab,kw. OR Liberia\*.ti,ab,kw. OR Mali\*.ti,ab,kw. OR Mauritania\*.ti,ab,kw. OR Niger\*.ti,ab,kw. OR Nigeria\*.ti,ab,kw. OR Senegal\*.ti,ab,kw. OR Sierra Leone\*.ti,ab,kw. OR Togo\*.ti,ab,kw. OR Eswatini\*.ti,ab,kw. OR Seychelles\*.ti,ab,kw. OR sub-Saharan\*.ti,ab,kw. OR Africa\*.ti,ab,kw.)

**Filters: from 2010 – 2020**

### 3. Global Health Database

("Surgical Procedures" or "surgery" or anaesthesia or anesthesia or anaesthesia or surger\* or surgical).mp. AND ("Healthcare Financing" or "Health Policy" or "Universal Health Insurance" or "Health Planning" or "Health Expenditures" or Expenditure\* or "Health Insurance" or "Health Services" or "health economics" or Economics or "Fund raising" or "Health Care Costs" or "Fees and Charges" OR Financing" or budgets or "Health Services Accessibility" or "health priorit\*" or Financ\* or Revenue\* or Charities or "Universal Health Care" or "Universal Health Coverage" or "National Health Accounts" or payment\* or Budget allocation\* or "Health Insurance").mp. AND ("Africa South of the Sahara" or Africa\* or Cameroon\* or "Central African Republic\*" or Congo\* or Chad\* or "Democratic Republic of the Congo\*" or "Equatorial Guinea\*" or Gabon\* or "Sao Tome and Principe\*" or Burundi\* or Madagascar\* or Comoros\* or Mauriti\* or Eritrea\* or Ethiopia\* or Kenya\* or

792

Rwanda\* or Somalia\* or South Sudan\* or Sudan\* or Tanzania\* or Uganda\* or Angola\* or Botswana\* or Lesotho\* or Malawi\* or Mozambique\* or Namibia\* or "South Africa\*" or Swaziland\* or Zambia\* or Zimbabwe\* or Benin\* or "Burkina Faso\*" or Cabo Verde\* or "Cote d'Ivoire\*" or Gambia\* or Ghana\* or Guinea\* or Guinea-Bissau\* or Liberia\* or Mali\* or Mauritania\* or Niger\* or Nigeria\* or Senegal\* or Sierra Leone\* or Togo\* or eswatini\* or Seychelles\* or sub-Saharan\*).mp.

**Filters: from 2010 – 2020**

For peer review only

S2: Preferred Reporting Items for Systematic reviews and Meta-Analyses extension for Scoping Reviews (PRISMA-ScR) Checklist

| SECTION                                               | ITEM | PRISMA-ScR CHECKLIST ITEM                                                                                                                                                                                                                                                                                  | REPORTED ON PAGE # |
|-------------------------------------------------------|------|------------------------------------------------------------------------------------------------------------------------------------------------------------------------------------------------------------------------------------------------------------------------------------------------------------|--------------------|
| <b>TITLE</b>                                          |      |                                                                                                                                                                                                                                                                                                            |                    |
| Title                                                 | 1    | Identify the report as a scoping review.                                                                                                                                                                                                                                                                   | 1                  |
| <b>ABSTRACT</b>                                       |      |                                                                                                                                                                                                                                                                                                            |                    |
| Structured summary                                    | 2    | Provide a structured summary that includes (as applicable): background, objectives, eligibility criteria, sources of evidence, charting methods, results, and conclusions that relate to the review questions and objectives.                                                                              | 3                  |
| <b>INTRODUCTION</b>                                   |      |                                                                                                                                                                                                                                                                                                            |                    |
| Rationale                                             | 3    | Describe the rationale for the review in the context of what is already known. Explain why the review questions/objectives lend themselves to a scoping review approach.                                                                                                                                   | 5-6                |
| Objectives                                            | 4    | Provide an explicit statement of the questions and objectives being addressed with reference to their key elements (e.g., population or participants, concepts, and context) or other relevant key elements used to conceptualize the review questions and/or objectives.                                  | 6                  |
| <b>METHODS</b>                                        |      |                                                                                                                                                                                                                                                                                                            |                    |
| Protocol and registration                             | 5    | Indicate whether a review protocol exists; state if and where it can be accessed (e.g., a Web address); and if available, provide registration information, including the registration number.                                                                                                             | Not Applicable     |
| Eligibility criteria                                  | 6    | Specify characteristics of the sources of evidence used as eligibility criteria (e.g., years considered, language, and publication status), and provide a rationale.                                                                                                                                       | 6-7                |
| Information sources*                                  | 7    | Describe all information sources in the search (e.g., databases with dates of coverage and contact with authors to identify additional sources), as well as the date the most recent search was executed.                                                                                                  | 7                  |
| Search                                                | 8    | Present the full electronic search strategy for at least 1 database, including any limits used, such that it could be repeated.                                                                                                                                                                            | 7                  |
| Selection of sources of evidence†                     | 9    | State the process for selecting sources of evidence (i.e., screening and eligibility) included in the scoping review.                                                                                                                                                                                      | 7-9                |
| Data charting process‡                                | 10   | Describe the methods of charting data from the included sources of evidence (e.g., calibrated forms or forms that have been tested by the team before their use, and whether data charting was done independently or in duplicate) and any processes for obtaining and confirming data from investigators. | 9                  |
| Data items                                            | 11   | List and define all variables for which data were sought and any assumptions and simplifications made.                                                                                                                                                                                                     | 9                  |
| Critical appraisal of individual sources of evidence§ | 12   | If done, provide a rationale for conducting a critical appraisal of included sources of evidence; describe the methods used and how this information was used in any data synthesis (if appropriate).                                                                                                      | Not Applicable     |
| Synthesis of results                                  | 13   | Describe the methods of handling and summarizing the data that were charted.                                                                                                                                                                                                                               | 9                  |

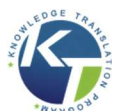

| SECTION                                       | ITEM | PRISMA-ScR CHECKLIST ITEM                                                                                                                                                                       | REPORTED ON PAGE # |
|-----------------------------------------------|------|-------------------------------------------------------------------------------------------------------------------------------------------------------------------------------------------------|--------------------|
| <b>RESULTS</b>                                |      |                                                                                                                                                                                                 |                    |
| Selection of sources of evidence              | 14   | Give numbers of sources of evidence screened, assessed for eligibility, and included in the review, with reasons for exclusions at each stage, ideally using a flow diagram.                    | 10-11              |
| Characteristics of sources of evidence        | 15   | For each source of evidence, present characteristics for which data were charted and provide the citations.                                                                                     | 10-11              |
| Critical appraisal within sources of evidence | 16   | If done, present data on critical appraisal of included sources of evidence (see item 12).                                                                                                      | Not Applicable     |
| Results of individual sources of evidence     | 17   | For each included source of evidence, present the relevant data that were charted that relate to the review questions and objectives.                                                           | 11-18              |
| Synthesis of results                          | 18   | Summarize and/or present the charting results as they relate to the review questions and objectives.                                                                                            | 11-18              |
| <b>DISCUSSION</b>                             |      |                                                                                                                                                                                                 |                    |
| Summary of evidence                           | 19   | Summarize the main results (including an overview of concepts, themes, and types of evidence available), link to the review questions and objectives, and consider the relevance to key groups. | 18-21              |
| Limitations                                   | 20   | Discuss the limitations of the scoping review process.                                                                                                                                          | 21                 |
| Conclusions                                   | 21   | Provide a general interpretation of the results with respect to the review questions and objectives, as well as potential implications and/or next steps.                                       | 21                 |
| <b>FUNDING</b>                                |      |                                                                                                                                                                                                 |                    |
| Funding                                       | 22   | Describe sources of funding for the included sources of evidence, as well as sources of funding for the scoping review. Describe the role of the funders of the scoping review.                 | 22                 |

JBI = Joanna Briggs Institute; PRISMA-ScR = Preferred Reporting Items for Systematic reviews and Meta-Analyses extension for Scoping Reviews.

\* Where *sources of evidence* (see second footnote) are compiled from, such as bibliographic databases, social media platforms, and Web sites.

† A more inclusive/heterogeneous term used to account for the different types of evidence or data sources (e.g., quantitative and/or qualitative research, expert opinion, and policy documents) that may be eligible in a scoping review as opposed to only studies. This is not to be confused with *information sources* (see first footnote).

‡ The frameworks by Arksey and O'Malley (6) and Levac and colleagues (7) and the JBI guidance (4, 5) refer to the process of data extraction in a scoping review as data charting.

§ The process of systematically examining research evidence to assess its validity, results, and relevance before using it to inform a decision. This term is used for items 12 and 19 instead of "risk of bias" (which is more applicable to systematic reviews of interventions) to include and acknowledge the various sources of evidence that may be used in a scoping review (e.g., quantitative and/or qualitative research, expert opinion, and policy document).

From: Tricco AC, Lillie E, Zarin W, O'Brien KK, Colquhoun H, Levac D, et al. PRISMA Extension for Scoping Reviews (PRISMA-ScR): Checklist and Explanation. *Ann Intern Med.* ;169:467–473. doi: 10.7326/M18-0850

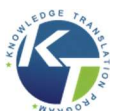

St. Michael's

Inspired Care.  
Inspiring Science.

For peer review only - <http://bmjopen.bmj.com/site/about/guidelines.xhtml>

## S3: Breakdown of Included Articles by Countries of Focus

| <b>Country</b>      | <b>Number of Related Publications</b> |
|---------------------|---------------------------------------|
| <b>Benin</b>        | 9                                     |
| <b>Botswana</b>     | 1                                     |
| <b>Burkina Faso</b> | 6                                     |
| <b>Cameroon</b>     | 9                                     |
| <b>DRC</b>          | 6                                     |
| <b>Ethiopia</b>     | 8                                     |
| <b>Gabon</b>        | 2                                     |
| <b>Ghana</b>        | 13                                    |
| <b>Guinea</b>       | 3                                     |
| <b>Kenya</b>        | 14                                    |
| <b>Madagascar</b>   | 5                                     |
| <b>Malawi</b>       | 5                                     |
| <b>Mali</b>         | 8                                     |
| <b>Mauritania</b>   | 1                                     |
| <b>Mozambique</b>   | 2                                     |
| <b>Namibia</b>      | 2                                     |
| <b>Nigeria</b>      | 34                                    |
| <b>Rwanda</b>       | 5                                     |
| <b>Senegal</b>      | 3                                     |
| <b>Sierra Leone</b> | 4                                     |
| <b>South Africa</b> | 3                                     |
| <b>Sudan</b>        | 2                                     |
| <b>Tanzania</b>     | 11                                    |
| <b>Togo</b>         | 2                                     |
| <b>Uganda</b>       | 15                                    |
| <b>Zambia</b>       | 2                                     |
| <b>Zimbabwe</b>     | 2                                     |
| <b>Non-Specific</b> | 8                                     |

# BMJ Open

## Financing of Surgery and Anaesthesia in Sub-Saharan Africa: A Scoping Review

|                                 |                                                                                                                                                                                                                                                                                                                                                                                                                                                                                                                                                                                                                                                                                                                                                                                                                                                             |
|---------------------------------|-------------------------------------------------------------------------------------------------------------------------------------------------------------------------------------------------------------------------------------------------------------------------------------------------------------------------------------------------------------------------------------------------------------------------------------------------------------------------------------------------------------------------------------------------------------------------------------------------------------------------------------------------------------------------------------------------------------------------------------------------------------------------------------------------------------------------------------------------------------|
| Journal:                        | <i>BMJ Open</i>                                                                                                                                                                                                                                                                                                                                                                                                                                                                                                                                                                                                                                                                                                                                                                                                                                             |
| Manuscript ID                   | bmjopen-2021-051617.R1                                                                                                                                                                                                                                                                                                                                                                                                                                                                                                                                                                                                                                                                                                                                                                                                                                      |
| Article Type:                   | Original research                                                                                                                                                                                                                                                                                                                                                                                                                                                                                                                                                                                                                                                                                                                                                                                                                                           |
| Date Submitted by the Author:   | 07-Sep-2021                                                                                                                                                                                                                                                                                                                                                                                                                                                                                                                                                                                                                                                                                                                                                                                                                                                 |
| Complete List of Authors:       | Ifeanyichi, Martilord; Radboudumc, Department for Health Evidence Aune, Ellis; Radboudumc, Department for Health Evidence Shrime, Mark; Royal College of Surgeons in Ireland, Institute of Global Surgery; Harvard Medical School, Department of Global Health and Social Medicine<br>Gajewski, Jakub ; Royal College of Surgeons in Ireland, Institute of Global Surgery<br>Pittalis, Chiara ; Royal College of Surgeons in Ireland, Department of Public Health and Epidemiology<br>Kachimba, John; University of Zambia University Teaching Hospital, Department of Surgery<br>Borgstein, Eric; University of Malawi<br>Brugha, Ruairi; Royal College of Surgeons in Ireland, Department of Public Health and Epidemiology<br>Baltussen, Rob; Radboudumc, Department for Health Evidence<br>Bijlmakers, Leon; Radboudumc, Department for Health Evidence |
| <b>Primary Subject Heading</b>: | Global health                                                                                                                                                                                                                                                                                                                                                                                                                                                                                                                                                                                                                                                                                                                                                                                                                                               |
| Secondary Subject Heading:      | Health economics, Health policy, Surgery                                                                                                                                                                                                                                                                                                                                                                                                                                                                                                                                                                                                                                                                                                                                                                                                                    |
| Keywords:                       | Health policy < HEALTH SERVICES ADMINISTRATION & MANAGEMENT, HEALTH ECONOMICS, SURGERY, PUBLIC HEALTH, ANAESTHETICS                                                                                                                                                                                                                                                                                                                                                                                                                                                                                                                                                                                                                                                                                                                                         |
|                                 |                                                                                                                                                                                                                                                                                                                                                                                                                                                                                                                                                                                                                                                                                                                                                                                                                                                             |

SCHOLARONE™  
Manuscripts





I, the Submitting Author has the right to grant and does grant on behalf of all authors of the Work (as defined in the below author licence), an exclusive licence and/or a non-exclusive licence for contributions from authors who are: i) UK Crown employees; ii) where BMJ has agreed a CC-BY licence shall apply, and/or iii) in accordance with the terms applicable for US Federal Government officers or employees acting as part of their official duties; on a worldwide, perpetual, irrevocable, royalty-free basis to BMJ Publishing Group Ltd ("BMJ") its licensees and where the relevant Journal is co-owned by BMJ to the co-owners of the Journal, to publish the Work in this journal and any other BMJ products and to exploit all rights, as set out in our [licence](#).

The Submitting Author accepts and understands that any supply made under these terms is made by BMJ to the Submitting Author unless you are acting as an employee on behalf of your employer or a postgraduate student of an affiliated institution which is paying any applicable article publishing charge ("APC") for Open Access articles. Where the Submitting Author wishes to make the Work available on an Open Access basis (and intends to pay the relevant APC), the terms of reuse of such Open Access shall be governed by a Creative Commons licence – details of these licences and which [Creative Commons](#) licence will apply to this Work are set out in our licence referred to above.

Other than as permitted in any relevant BMJ Author's Self Archiving Policies, I confirm this Work has not been accepted for publication elsewhere, is not being considered for publication elsewhere and does not duplicate material already published. I confirm all authors consent to publication of this Work and authorise the granting of this licence.

1  
2  
3 1 **Title of Manuscript:** Financing of Surgery and Anaesthesia in Sub-Saharan Africa: A Scoping  
4 2 Review  
5

6 3  
7 4 **Authors' Information:**  
8

9 5  
10 6 1. **Martilord Ifeanyi, MBBS, MSc** \* (Corresponding author)

11 7 Affiliations: Department for Health Evidence, Radboud Institute for Health Sciences, Radboud  
12 8 University Medical Centre, Nijmegen, The Netherlands

13 9 Email: [martilord.ifeanyi@radboudumc.nl](mailto:martilord.ifeanyi@radboudumc.nl)

14 10 Tel: +31685497734

15 11 Address: Geert Grooteplein-Noord 10, 6525 GA, Nijmegen, The Netherlands  
16 12

17 13 2. Ellis Aune

18 14 Affiliation: Department for Health Evidence, Radboud Institute for Health Sciences, Radboud  
19 15 University Medical Centre, Nijmegen, The Netherlands

20 16 Email: [ellis.aune@student.ru.nl](mailto:ellis.aune@student.ru.nl)  
21 17

22 18 3. Mark Shrime, MD, PhD

23 19 Affiliations: (i) Institute of Global Surgery, Royal College of Surgeons in Ireland, Dublin,  
24 20 Ireland

25 21 (ii) Department of Global Health and Social Medicine, Harvard Medical School, Boston, USA

26 22 Email: [shrime@gmail.com](mailto:shrime@gmail.com)  
27 23

28 24 4. Jakub Gajewski, PhD

29 25 Affiliation: Institute of Global Surgery, Royal College of Surgeons in Ireland, Dublin, Ireland

30 26 Email: [jakubgajewski@rcsi.ie](mailto:jakubgajewski@rcsi.ie)  
31 27

32 28 5. Chiara Pittalis, MSc

33 29 Affiliation: Department of Epidemiology and Public Health Medicine, Royal College of  
34 30 Surgeons in Ireland, Dublin, Ireland

35 31 Email: [chiarapittalis@rcsi.ie](mailto:chiarapittalis@rcsi.ie)  
36 32  
37 33  
38  
39  
40  
41  
42  
43  
44  
45  
46  
47  
48  
49  
50  
51  
52  
53  
54  
55  
56  
57  
58  
59  
60

1  
2  
3 1 6. John Kachimba, MD

4  
5 2 Affiliation: Surgical Society of Zambia, Department of Surgery, University Teaching Hospital,  
6  
7 3 Nationalist Road, Lusaka, Zambia

8  
9 4 Email: [jskachimba@gmail.com](mailto:jskachimba@gmail.com)  
10  
11 5

12 6 7. Eric Borgstein, MD

13  
14 7 Affiliation: College of Medicine, University of Malawi, Blantyre, Malawi

15  
16 8 Email: [eborg@me.com](mailto:eborg@me.com)  
17  
18 9

19 10 8. Ruairi Brugha, MD

20  
21 11 Affiliation: Department of Epidemiology and Public Health Medicine, Royal College of  
22  
23 12 Surgeons in Ireland, Dublin, Ireland

24  
25 13 Email: [rbrugha@rcsi.ie](mailto:rbrugha@rcsi.ie)  
26  
27 14

28 15 9. Rob Baltussen, PhD

29  
30 16 Affiliation: Department for Health Evidence, Radboud Institute for Health Sciences, Radboud  
31  
32 17 University Medical Centre, Nijmegen, The Netherlands

33  
34 18 Email: [rob.baltussen@radboudumc.nl](mailto:rob.baltussen@radboudumc.nl)  
35  
36 19

37 20 10. Leon Bijlmakers, PhD, MSc

38  
39 21 Affiliation: Department for Health Evidence, Radboud Institute for Health Sciences, Radboud  
40  
41 22 University Medical Centre, Nijmegen, The Netherlands

42  
43 23 Email: [leon.bijlmakers@radboudumc.nl](mailto:leon.bijlmakers@radboudumc.nl)  
44  
45 24

46  
47 25 **Word Count: 4,301**  
48  
49 26  
50 27  
51 28  
52 29  
53  
54 30  
55  
56 31  
57  
58 32  
59  
60

1  
2  
3 1 **ABSTRACT**  
4

5 2 **Objective:** This study aimed to provide an overview of current knowledge on financing of  
6  
7 3 surgical and anaesthesia care across sub-Saharan Africa (SSA).  
8  
9

10 4 **Setting:** Surgery and anaesthesia services across all levels of care - primary, secondary and  
11  
12 5 tertiary.  
13  
14

15 6 **Design:** We performed a scoping review of scientific databases (PubMed, EMBASE, Global  
16  
17 7 Health and African Index Medicus), grey literature, and websites of development  
18  
19 8 organisations. Screening and data extraction were conducted by two independent reviewers and  
20  
21 9 abstracted data were summarized using thematic narrative synthesis per the financing domains:  
22  
23 10 mobilization, pooling and purchasing.  
24  
25  
26  
27

28 11 **Results:** The search resulted in 5533 unique articles among which 149 met the inclusion  
29  
30 12 criteria: 132 were related to mobilization, 17 to pooling, and 5 to purchasing. Neglect of surgery  
31  
32 13 in national health priorities is widespread in SSA and no report was found on national level  
33  
34 14 surgical expenditures or budgetary allocations. Financial protection mechanisms are weak or  
35  
36 15 non-existent; poor patients often forego care or face financial catastrophes in seeking care, even  
37  
38 16 in the context of universal public financing (free care) initiatives.  
39  
40  
41

42 17 **Conclusion:** Financing of surgical and anaesthesia care in SSA is as poor as it is under-  
43  
44 18 investigated, calling for increased national prioritisation and tracking of surgical funding.  
45  
46 19 Improving availability, accessibility, and affordability of surgical and anaesthesia care require  
47  
48 20 comprehensive and inclusive policy formulations.  
49  
50  
51

52 21 **KEY WORDS:** Global Surgery; Sub-Saharan Africa; Health Financing; Universal Health  
53  
54 22 Care; Health Accounts  
55  
56  
57

58 23  
59  
60

## 1 **Strengths and Limitations of this Study**

- 2 • This study was conducted based on standard guidelines, including Arksey and  
3 O'Malley (2005), Levac et al (2010), the Joanna Briggs Institute (2020), and  
4 PRISMA Statement and its extension for scoping reviews.
- 5 • It benefited from a comprehensive published and grey literature search strategy  
6 designed with the support of institutional bibliographers.
- 7 • The use of two independent reviewers and an arbiter ensured meticulousity while  
8 minimising biases in the review process.
- 9 • It thoroughly examines the situation and the current knowledge on the financing of  
10 surgery and anaesthesia in sub-Saharan Africa.
- 11 • Findings from one country may not represent the situation or be applicable in other  
12 countries in the region.

## 1 INTRODUCTION

2 Over 70% of the world population lack access to safe, timely and affordable surgical, obstetric  
3 and anaesthesia (SOA) care, with an estimated nine out of ten people affected in sub-Saharan  
4 Africa (SSA).<sup>1</sup> The Lancet Commission on Global Surgery (LCGS) has set a timeline of 2030  
5 for 80% of the global population to have access to SOA care,<sup>2</sup> and as a strategy, it also  
6 recommended that low- and middle-income countries (LMICs) develop National Surgical,  
7 Obstetrics, and Anaesthesia Plans (NSOAPs), structured into five domains: service delivery,  
8 infrastructure, workforce, information management, and financing.<sup>2</sup> The financing system is  
9 critical to the achievement of universal access to surgical care, as it directly affects availability,  
10 accessibility and affordability of services.

11  
12 Health financing is the “function of a health system concerned with the mobilization,  
13 accumulation and allocation of money to cover the health needs of the people, individually and  
14 collectively, in the health system”.<sup>3</sup> Three cardinal but interrelated functions of health financing  
15 are distinguished: revenue collection, resource pooling, and purchasing.<sup>3</sup> Resource  
16 mobilization refers to the ways in which revenues are raised and collected, including  
17 government budgetary allocations (from taxes), health insurance premiums, out-of-pocket  
18 payments (OOP) and donor funding. The pooling function refers to the mechanisms of  
19 accumulation of prepaid funds on behalf of populations in order to address financial challenges  
20 at the point of service delivery. Pooling delinks expected health expenditures from patients’  
21 ability to pay,<sup>4</sup> and ideally protects people from catastrophic or impoverishing expenditure  
22 while accessing health services. The most common pooling mechanisms are government tax  
23 revenues pooling for health and health insurance schemes. The purchasing function refers to  
24 the payment systems for health goods and services provided.

25

1  
2  
3 1  
4  
5  
6 2  
7  
8 3  
9  
10 4  
11  
12 5  
13  
14 6  
15  
16 7  
17  
18 8  
19  
20 9  
21  
22 10  
23  
24 11  
25  
26 12  
27  
28 13  
29  
30 14  
31  
32 15  
33  
34 16  
35  
36 17  
37  
38 18  
39  
40 19  
41  
42 20  
43  
44 21  
45  
46 22  
47  
48 23  
49  
50  
51  
52  
53  
54  
55  
56  
57  
58  
59  
60

To improve surgical financing, the LCGS recommended that national governments undertake the following: cover basic surgical care within Universal Health Coverage (UHC); pool risks in a single pool and reduce payments at point of service; track financial flows for surgery through national health accounts; and use value-based purchasing with risk-pooled funds. Further, as progress assessment indicators, they proposed that surgical expenditure be reported as a percentage of GDP and as a percentage of annual health care expenditure; and that out-of-pocket payments on surgery, and catastrophic and impoverishing expenditure on surgery be monitored. It is noteworthy that catastrophic and impoverishing expenditures on surgery have been included in the World Bank World Development Indicators (WDI).<sup>5</sup>

Since the LCGS report in 2015, five SSA countries have launched and are implementing their NSOAPs: Rwanda, Zambia, Tanzania, Nigeria and Madagascar.<sup>6</sup> Dozens of other SSA countries are either in the process of or have committed to the development of NSOAPs. Development of health policies require baseline analyses.<sup>7</sup> In the development of the Tanzania NSOAP, a situational analysis conducted by Nyberger et al using a systematic review of literature guided a stakeholder discussion to directly inform the NSOAP priorities.<sup>8</sup> In the financing domain however, the review found only limited evidence – highlighting a paucity of research on the financing of surgery, especially at country levels. A collation of evidence from different countries may be beneficial to national health policy makers, and as more countries develop and adopt NSOAPs, there is a need for more evidence to guide these investments towards improving SOA care in sub-Saharan Africa.

1 This study aimed therefore to provide a general overview of the evidence on financing of  
2 surgery in SSA, produce a database of all studies related to the subject, and identify research  
3 gaps to guide future research efforts.

## 4 5 **METHODS**

### 6 7 **Framework**

8 Given the aim of the study, a scoping review was adopted. “A scoping review or scoping study  
9 is a form of knowledge synthesis that addresses an exploratory research question aimed at  
10 mapping key concepts, types of evidence, and gaps in research related to a defined area or field  
11 by systematically searching, selecting, and synthesizing existing knowledge”.<sup>9</sup> Beyond  
12 mapping evidence, scoping reviews are particularly useful for summarizing and disseminating  
13 research findings to policy makers, practitioners and consumers who might otherwise be unable  
14 to engage in such tasks themselves due to time and resource constraints.<sup>10</sup>

15  
16 This study followed the five-step approach described by Arksey and O’Malley<sup>10</sup> who provided  
17 the first methodological framework for conducting scoping reviews: (i) Identifying the research  
18 question; (ii) Identifying relevant studies; (iii) Study selection; (iv) Charting the data; (v)  
19 Collating, summarising and reporting results. This was supplemented with the  
20 recommendations of Levac et al<sup>11</sup> and the Joanna Briggs Institute (JBI).<sup>12</sup>

### 21 22 **Research Question**

23 Broadly, this study was underpinned by the question: *What is known from the existing literature*  
24 *about financing of surgery and anaesthesia in SSA?*

25 Specific sub-questions that guided the study are:



1  
2  
3 1 Regarding financing of surgery and anaesthesia in SSA -  
4

5 2 i. What is the situation?  
6

7 3 ii. What mechanisms (if any) mobilise, pool and allocate resources for services?  
8

9 4 iii. What strategies have been trialled to improve access?  
10

11 5 iv. What has been the progress since the 2015 publication of the LCGS?  
12

13 6 v. What specific challenges are identified?  
14

15 7 vi. What policy options are recommended for improvement?  
16  
17  
18  
19  
20  
21  
22

8

### 9 **Search Strategy and Data Sources**

10 The search query was designed based on three search blocks - “surgery and anaesthesia”,  
11 ”health financing”, and “sub-Saharan Africa” - with the assistance of institution bibliographers.

12 The primary query was built on PubMed, in an iterative fashion, using a list of already  
13 identified relevant articles. The final PubMed query was adapted and applied to all the other  
14 databases. The full search string is included in Supplemental material 1 (S1).  
15  
16

17 We searched four bibliographic databases without any language restrictions: Global Health on  
18 22<sup>nd</sup> July 2020, and PubMed, Embase, and African Index Medicus on July 24<sup>th</sup>. Searches were  
19 restricted to articles published between January 2010 and July 2020, to capture a fairly current  
20 situation, while covering approximately five years before and after the LCGS report.  
21 Conference proceedings, dissertations, and animal studies were excluded. Additionally, we  
22 performed snowballing by hand-searching for further possibly relevant articles cited in the  
23 identified articles. A grey literature search was conducted on Google, and websites of WHO,  
24 World Bank, and USAID were also manually searched.  
25

### 25 **Screening Process and Management**

1  
2  
3 1  
4  
5 2 All search results were first imported into EndNote X9 for deduplication, and then exported to  
6  
7  
8 3 Rayyan,<sup>13</sup> a web and mobile app designed for systematic reviews, for title and abstract  
9  
10  
11 4 screening. The initial screening was performed independently by authors MI and EA. In case  
12  
13 5 of discrepancy, MI and EA reviewed the abstract together, and if no agreement could be  
14  
15 6 reached, author LB was consulted to make the final decision. In the second round, full texts of  
16  
17 7 included articles were reviewed independently and discussed by authors MI and EA, and LB  
18  
19 8 was again consulted in case of irresolvable discrepancies. French articles were handled solely  
20  
21 9 by author LB who possesses a full professional proficiency in French Language.  
22  
23  
24 10

25  
26 11 The Population, Concept, and Context (PCC) framework described by the JBI<sup>12</sup> was used to  
27  
28 12 define the inclusion/exclusion criteria, which are included in Table 1. Relevance criteria were  
29  
30 13 applied in a hierarchical fashion: each article was assessed firstly on whether or not it pertained  
31  
32 14 to SSA, then whether or not it pertained to surgery, and lastly whether it covered financing of  
33  
34 15 surgery. All available sources were included.  
35  
36  
37 16  
38  
39  
40 17

41 Table 1: Inclusion and Exclusion Criteria  
42

|                   | <b>Inclusion Criteria</b>                                                                                                                                                                                                                                                                           | <b>Exclusion Criteria</b>                                                                                                                                                                                                                    |
|-------------------|-----------------------------------------------------------------------------------------------------------------------------------------------------------------------------------------------------------------------------------------------------------------------------------------------------|----------------------------------------------------------------------------------------------------------------------------------------------------------------------------------------------------------------------------------------------|
| <b>Population</b> | <ul style="list-style-type: none"> <li>• General population</li> <li>• Major surgery patients</li> <li>• Operative and non-operative surgery patients</li> <li>• Healthcare providers</li> <li>• Health policy makers</li> <li>• Agencies or organisations involved in surgery financing</li> </ul> | <ul style="list-style-type: none"> <li>• Non-surgery patients</li> <li>• Medical gynaecological patients</li> <li>• Medical obstetric patients</li> <li>• Patients with minor procedures such as male circumcision, post-abortion</li> </ul> |

|                |                                                                                                                                                                                                                                                                                                                     |                                                                                                                                                                                                                                                    |
|----------------|---------------------------------------------------------------------------------------------------------------------------------------------------------------------------------------------------------------------------------------------------------------------------------------------------------------------|----------------------------------------------------------------------------------------------------------------------------------------------------------------------------------------------------------------------------------------------------|
|                |                                                                                                                                                                                                                                                                                                                     | care (e.g. manual vacuum aspiration)                                                                                                                                                                                                               |
| <b>Concept</b> | <ul style="list-style-type: none"> <li>• Financing of surgical care including user fees, tax funding, health insurance, donor funds</li> <li>• Universal health coverage</li> <li>• Equity in surgery care access</li> <li>• Impoverishing and catastrophic expenditures</li> <li>• Economics of surgery</li> </ul> | <ul style="list-style-type: none"> <li>• Costing studies (without financing data)</li> <li>• Cost-effectiveness studies (without financing data)</li> <li>• Studies focusing on the epidemiological or clinical aspects of surgeries</li> </ul>    |
| <b>Context</b> | <ul style="list-style-type: none"> <li>• Primary, secondary and tertiary hospital care</li> <li>• Sub-Saharan Africa</li> <li>• Global surgery studies broadly (including SSA)</li> </ul>                                                                                                                           | <ul style="list-style-type: none"> <li>• Non-hospital primary health facilities (dispensaries, health posts, health centres)</li> <li>• Studies focusing on high-income countries only</li> <li>• Studies focusing on LMICs outside SSA</li> </ul> |

## 2 Data Charting and Analysis

Data charting (ie extraction) was performed using a customized form in Excel 2020 based on the JBI guidelines.<sup>12</sup> All empirical evidence related to any of the functions of health financing was extracted; maintaining an approach broad enough to include even evidence related to the absence of these functions and their implications for surgery delivery and access. In addition, non-empirical but unique or sufficiently compelling (as adjudged by the two independent researchers) insights on challenges or policy options for surgical financing were also extracted. In doing these, a bottom up thematic analysis was employed<sup>14</sup>: emerging themes were

1 identified and coded within the functional domains. This was subsequently followed by axial  
2 coding ie linking conceptually related themes together. Descriptive statistics were computed  
3 for the article characteristics.

## 4 **Summarisation and Reporting of Results**

5 A narrative synthesis was employed in summarising the results of the research question,  
6 maintaining the three financing domains as the overarching themes. Results are presented as  
7 per PRISMA Statement <sup>15</sup> and its extension for scoping reviews (See Supplemental material  
8 2[S2]).<sup>16</sup>

## 9 **Patient and Public Involvement**

10 Patients or the public were not involved in the design, conduct, or reporting, or dissemination  
11 plans of our research.

## 12 **RESULTS**

13 Following deduplication, our search resulted in 5533 unique articles. Text and abstract  
14 screening produced 229 articles, of which 149 met the inclusion criteria following full text  
15 reading (Figure 1). Most (132) were in English and nine were in French. Two-third of the  
16 articles were published between 2015 and 2020. In terms of geographical spread, the studies  
17 covered 28 countries: Nigeria had the highest number of articles (34), followed by Uganda (15)  
18 and Kenya (14). Eight articles were non-specific while several articles cut across more than  
19 one country. Details are presented in Supplemental material 3 (S3).

20 The majority of articles focused on specific surgical conditions or subspecialties (N=121;  
21 81%), while 28 were non-specific or dealt with surgical systems generally. Obstetrics (mostly  
22 Caesarean sections) had the highest number of articles (39), followed by ophthalmology (24;

1  
2  
3 1 mostly cataract procedures), and oncology (17). The breakdown of the articles per specialty is  
4  
5 2 presented in Figure 2.

6  
7  
8 3 The majority of the articles were empirical (N=138; 92%); ten were opinion/editorial papers,  
9  
10 4 while one was a technical brief. The empirical articles included 112 quantitative studies (81%),  
11  
12 5 12 qualitative studies, 11 mixed-methods studies, and three systematic reviews. Most of the  
13  
14 6 quantitative articles were descriptive (N=81; 72%); 12 were analytical (cohort or case-control);  
15  
16 7 five were modelling studies; and 14 were quasi-experimental (including four interrupted time  
17  
18 8 series analyses, two propensity score matching analyses, two difference-in-difference analyses,  
19  
20 9 and six uncontrolled before-and-after studies).

21  
22  
23  
24  
25 10 The bulk of the articles related to the pooling and risk protection function of health financing  
26  
27 11 (N=132; 89%); 17 related to financial resource mobilization (11%), and five to purchasing  
28  
29 12 (3%). Some of the articles related to more than one domain. In the next sections, we present a  
30  
31 13 thematic narrative of the data extracted from the various articles.

32  
33  
34  
35 14  
36  
37  
38 15 Figure 1: PRISMA flowchart of the search process

39  
40  
41 16  
42  
43  
44 17 Figure 2: Breakdown of the selected articles by surgical specialties

### 45 46 47 18 48 49 50 19 **(I) Resource Mobilisation and Budgetary Allocations to Surgery.**

51  
52  
53 20 Seventeen articles explored the resource mobilization for or allocations to surgery. No report  
54  
55 21 of national or sub-national level budgetary allocations or actual expenditures on surgery was  
56  
57 22 found. There was evidence of poor prioritization of surgery in government plans and UHC  
58  
59 23 programmes in SSA generally: in a systematic review of National Health Strategic Plans

1 (NHSPs) of 48 SSA countries by Citron et al (2016), 19% of NHSPs had no mention of surgery  
2 or surgical conditions, and 63% had five or fewer mentions of surgery. Compared to HIV and  
3 malaria that had 3772 mentions across all the plans, surgery had only 376 mentions. While  
4 33% of policies had no surgical targets, all had measurable targets for HIV and TB control.<sup>17</sup>  
5  
6 Seven articles had data on revenue sources for surgery at the hospital level, with out-of-pocket  
7 payments (OOP),<sup>18-21</sup> government support,<sup>22</sup> and donor funds<sup>21 22</sup> identified as the biggest  
8 sources of the operational funds. In Ekenze and others' systematic review of studies published  
9 between January 2007 and November 2016 that reported the specific funding of paediatric  
10 surgeries in SSA, OOP was the predominant source of funding (91.4%), followed by NGO  
11 funding (60%).<sup>21</sup>  
12  
13 Regarding hospital expenditure on surgery, four studies were relevant.<sup>18 22-24</sup> In a retrospective  
14 cross-sectional study of the human and financial constraints to essential surgery at eight district  
15 hospitals (DHs) in Tanzania, Uganda, Mozambique, the DHs spent 7-14% of their operational  
16 funds on surgery, representing an annual per capita expenditure of US\$ 0.05 to 0.14.<sup>23</sup> The bulk  
17 of this expenditure (3-8% of total operational cost) was attributed to obstetrics alone.  
18 Comparable proportions (16-17%) were also reported at two DHs in Malawi.  
19  
20 Several approaches to increasing the funding of surgery were recommended in the articles. In  
21 the review by Ekenze et al, the main suggestions were increased funding by national  
22 governments and by international organisations (85.7%), the establishment or improvement of  
23 health insurance schemes (60%) and the sustained use of charities and medical missions  
24 (42.9%).<sup>21</sup> Several papers in our review emphasized public-private partnerships,<sup>25 26</sup> as well as  
scale-up of health insurance coverage.<sup>27-29</sup> Rather than attempting to reinvent the wheel in the  
face of structural and economic constraints, Frimpong called on national governments to tweak  
and leverage on the existing market models to scale-up local production of surgical

1 consumables, for example by replacing non-profitable tyre production with gloves and boots  
2  
3  
4  
5  
6  
7  
8  
9  
10  
11  
12  
13  
14  
15  
16  
17  
18  
19  
20  
21  
22  
23  
24  
25  
26  
27  
28  
29  
30  
31  
32  
33  
34  
35  
36  
37  
38  
39  
40  
41  
42  
43  
44  
45  
46  
47  
48  
49  
50  
51  
52  
53  
54  
55  
56  
57  
58  
59  
60

1 consumables, for example by replacing non-profitable tyre production with gloves and boots  
2 production, or production of cotton wool and gauze alongside or in place of cloth.<sup>30</sup>

3 Reddy et al (2020) advocated moving beyond the traditional funding sources.<sup>31</sup> They suggested  
4 innovative financing instruments that have been applied in other global health initiatives, such  
5 as voluntary solidarity levy (as in Unitaid), voluntary contributions (PRODUCT[RED]),  
6 performance-based instruments (GAVI), and securities and bonds (International Finance  
7 Facility for Immunisation [IFFI] and The Children's Investment Fund Foundation [CIFF])

## 8 **(II) Pooling/Risk Protection**

9 A total of 132 articles provided evidence related to pooling functions and financial protection.  
10 Eight subthemes emerged. Some themes portrayed dysfunctionality of the financial protection  
11 systems and their implications for patients: financial barriers to access of care, transport cost  
12 barriers, OOP and catastrophic/impooverishing expenditure, payment coping mechanisms, and  
13 low willingness to pay. Others explored commonly available financial protection interventions:  
14 universal public financing, and health insurance. Other studies evaluated how best to  
15 simultaneously achieve health benefits, financial protection, equity and efficiency in surgical  
16 care delivery. Several articles cut across multiple themes. The eight thematic clusters and  
17 selected illustrative studies are presented below:

### 18 *1. Financial barriers to accessing surgical care*

19 The 55 articles in this cluster investigated patient reported obstacles or challenges to surgical  
20 care and reported "costs" or "lack of finances" as a major reason for not seeking<sup>32</sup> and for not  
21 obtaining surgical care (following recommendation);<sup>33 34</sup> and as a reason for experiencing  
22 delays in accessing,<sup>26 35</sup> or dropping out of the surgical continuum of care.<sup>36 37</sup> In a population-  
23 based survey to assess the surgical burden of diseases in Uganda, 66% of the people living with  
24 treatable surgical conditions cited cost as the reason for not seeking care.<sup>32</sup> A systematic review

1 of barriers to cataract surgeries in Africa cautioned against face value interpretation of such  
2 findings, as “costs” are sometimes convenient masks for factors other than inability to pay,  
3 such as unwillingness to pay and complex family decision-making dynamics.<sup>38</sup>

#### 4 *2. Transport cost barrier*

5 Closely related to the above financial access barriers, 12 articles highlighted the particular  
6 challenges presented by transport costs to accessing surgical care, even in situations where  
7 medical treatments are provided free of charge. In interviews and focus group discussions with  
8 64 patients living with lymphatic filariasis in Ahanta West District of Ghana, 64% cited indirect  
9 costs (transport and loss of wages) as the most prohibitive factor to seeking care, despite the  
10 cost of surgery being covered under the National Health Insurance Scheme (NHIS).<sup>39</sup>

#### 11 *3. Out-of-Pocket, and Catastrophic and Impoverishing Expenditures*

12 Twenty-six publications explored OOP and catastrophic or impoverishing expenditure  
13 incidences and reported high rates. In a study that modelled global country-level comparison  
14 of the financial burden of surgery, the risk of financial hardship from surgery was highest in  
15 SSA, with up to 90% of patients facing the risks of catastrophes and up to 100% risk  
16 impoverishments.<sup>40</sup> Despite that health services are provided free of charge at public facilities  
17 in Malawi, 90-97% of hernia patients still suffered catastrophic expenditure.<sup>41</sup>

#### 18 *4. Patient Coping Mechanisms and Economic Consequences of Out-of-Pocket Payments*

19 Twelve articles provided insights into how households of surgical patients mobilise resources  
20 for OOPs as well as the adjustments they make in their daily lives to cope with the impact.  
21 Despite the free obstetric care policy in Malawi, 31% of the women who received such care  
22 borrowed money, 24% sold assets, 17% used their savings, while others got help from family  
23 members abroad (17%) or their local social network (12%).<sup>42</sup> Reported compromises in every  
24 day spending in the face of catastrophic surgical expenditure included decreases in food



1 consumption,<sup>42 43</sup> withdrawal of wards/children from school,<sup>42 44</sup> even as some households  
2 remained in debts several years after the surgery.<sup>42 43</sup>

### 3 *5. Willingness To Pay (WTP)*

4 Three articles investigated the willingness of surgical patients to pay for services. Even though  
5 most patients were willing to pay “something”, their WTP was usually lower than the actual  
6 cost of getting the surgery.<sup>45 46</sup> In a hospital-based survey of patients who had received free  
7 surgery in Malawi, participants expressed willingness to pay a median of US\$3, which was  
8 substantially lower than US\$60, the estimated combined cost of screening, transport, feeding,  
9 accommodation, medicines and surgery.<sup>46</sup> Studies showed that WTP for surgical services  
10 increases remarkably with counselling on the benefit<sup>47</sup> and actual cost of the surgery,<sup>38</sup> and  
11 increased trust in providers.<sup>38</sup>

### 12 *6. Universal Public Financing (UPF) or Free Services*

13 In a bid to protect patients from financial hazards, governments in SSA have often abolished  
14 user fees in public hospitals, either for all or certain categories of care. Twenty-three articles  
15 evaluated the implementation or the effects of such measures on service utilization and/or  
16 financial protection.

17 Free maternal and under-five care in Sierra-Leone was associated with a five-fold increase in  
18 the volume of paediatric surgeries in the 20 months after its introduction compared to 20  
19 months before at a public tertiary hospital; above-five surgeries increased by only 17%<sup>48</sup>.  
20 Perhaps partly reflecting differences in methodologies, conflicting reports were obtained on  
21 the effects of fee removal on Caesarian section rates, with various studies reporting nil impact,  
22 <sup>49 50</sup> increases,<sup>51</sup> and (possibly supplier-induced) excessive CS rates.<sup>52</sup>

23 Several papers reported significant financial hazards despite the free care policies, due to  
24 informal direct medical costs, indirect medical costs (particularly transportation), or both.

1 Patients often encountered informal direct medical OOPs due to frequent drug stockouts,  
2 equipment breakdowns, unofficial fees,<sup>44 51 53-55</sup> or outright bribery of health workers to  
3 “facilitate” access to so-called free care.<sup>51 52 56 57</sup>

4 The failure of UPF programmes across SSA to provide adequate financial protection has had  
5 adverse implications for equitable access to care, as evidenced in six studies. Pro-rich inequities  
6 were documented in use of CS several years after introduction of free obstetric care policies in  
7 Ghana,<sup>58 59</sup> Mali,<sup>60 61</sup> and Benin.<sup>61</sup>

8 Valuable insights were gained into the challenges confronting successful implementation of  
9 UPF policies. Poor funding and delayed or incomplete hospital reimbursements were  
10 commonly reported,<sup>54 62</sup> as was poor supervision and accountability mechanisms,<sup>62 63</sup> lack of  
11 clarity on policy provisions e.g. which items or services ought to be paid for,<sup>56 63</sup> poor  
12 specification and targeting of beneficiaries,<sup>52</sup> demotivation of hospital workers due to declines  
13 in hospital finances,<sup>54</sup> and resistance among health professionals manifesting as “rent-seeking”  
14 and corrupt practices to augment sagging personal incomes.<sup>52 56 62</sup>

### 15 *7. Health Insurance*

16 Twenty-three articles provided insights into health insurance coverage and the degree of  
17 protection it provides for surgery patients in SSA. Health insurance coverage rates among  
18 cross-sections of emergency surgery patients studied were generally poor: about 3% in  
19 Nigeria,<sup>64</sup> 6% in Mali,<sup>65</sup> 8% in Tanzania,<sup>66</sup> 17% in Madagascar,<sup>67</sup> and 23% in Kenya.<sup>68</sup>  
20 Coverage rates stood out in Ghana (67%), courtesy of National Health Insurance Fund  
21 (NHIF),<sup>69</sup> and Rwanda (98%) with its Community Health Insurance Fund (CHIF).<sup>70</sup>  
22 Instructively, higher rates were reported among elective surgery patients – 45% in Nigeria<sup>71</sup>  
23 and Tanzania,<sup>72</sup> and 90% in Kenya<sup>73</sup> – indicating a disproportionately higher uptake of elective  
24 services by the insured who are mostly the better off, at the expense of the poor.<sup>71 72</sup> This review

1  
2  
3 1 found evidence of some level of financial protection from health insurance. For instance, in a  
4  
5 2 study among surgical patients admitted over a period of eight months at a teaching hospital in  
6  
7 3 Ghana, 58-87% of insured patients faced catastrophic expenditure, compared to 83-98% among  
8  
9 4 the uninsured. The insured spent an average of 39% of their annual income on seeking surgical  
10  
11 5 care compared to 61% of the uninsured.<sup>74</sup> Like the UPF programmes however, concerns of  
12  
13 6 inequities remain.<sup>75</sup>  
14  
15  
16

17  
18 7 Various studies reported specific challenges associated with national health insurance schemes  
19  
20 8 in SSA. In Nigeria for instance, NHIS is considered as bureaucratic and elitist, covering only  
21  
22 9 civil servants and people of higher social status.<sup>27 71</sup> Beneficiaries have also reported lack of  
23  
24 10 clarity about what services are covered or not, as well as confusion about payment and  
25  
26 11 reimbursements mechanisms.<sup>27</sup> From the provider perspective, there have been worries about  
27  
28 12 NHIS reimbursement rates being lower than the actual service costs, forcing some private  
29  
30 13 providers to exit the programme, as well as delays in reimbursements which affect running of  
31  
32 14 the facility.<sup>71 76</sup> Another major and common challenge recorded was shallowness of benefit  
33  
34 15 coverages. Even though the insured had lower chances of catastrophic expenditure, a large  
35  
36 16 proportion of them still suffered catastrophes,<sup>74</sup> and still employed “extreme” payment coping  
37  
38 17 strategies.<sup>43</sup> Although poor awareness of NHIF was noted as an issue in SSA, studies indicate  
39  
40 18 patient education and sensitization again make a huge difference.<sup>77</sup>  
41  
42  
43  
44  
45

#### 46 19 *8. Balancing financial protection, equity and efficiency*

47  
48

49 20 An extended cost-effectiveness analysis by Shrimme et al (2016) evaluated the health, financial  
50  
51 21 and equity impacts of nine common NGO and government strategies towards improving access  
52  
53 22 to surgery in Uganda. It showed that only mobile surgical programmes and policies that  
54  
55 23 simultaneously address surgical service scale-up (providers), out-of-pocket expenditure for  
56  
57 24 surgery, and (the often ignored) transport cost, can provide health and financial benefits,  
58  
59  
60

1 equitably and efficiently, simultaneously.<sup>78</sup> A similar study in Ethiopia arrived at the same  
2 conclusion.<sup>79</sup>

### 3 **(III) Purchasing/Provider Payment**

4 Five articles had findings related to the purchasing function of health financing. Surgery  
5 providers in public institutions in SSA are generally salaried workers,<sup>80 81</sup> but poor  
6 remuneration is widespread. In a multi-centre survey of 41 paediatric surgeons across 11  
7 Francophone countries in SSA, the average salary in 2008 was just about 450 Euros per month  
8 (ranging from 120 to 1400 Euros).<sup>81</sup>

9 Two studies explored the effect of payments mechanisms on hospital operations. A before-and-  
10 after study in Burkina Faso showed that both government and household expenditure on CS  
11 increased after the free delivery policy changed from retrospective fee-for-service payment to  
12 prospective fee-for-service payment.<sup>82</sup> The other study showed that the introduction of  
13 performance-based financing at DHs in Rwanda was associated with an increase in the number  
14 of CS from 60 to 140 per quarter over a five-year period.<sup>83</sup>

## 15 **DISCUSSION**

16 Today, domestic resource mobilization for surgery in SSA is grossly deficient due to the double  
17 jeopardy of an overall constrained fiscal space for health and poor political prioritisation of  
18 surgery. Using Shiffman and Smith's analysis framework for assessing global health priorities,  
19 Frimpong-Boateng (2019) attributed the neglect to "the failure to communicate a clear policy  
20 need using powerful ideas that take advantage of the political contexts of the times".<sup>30</sup> There  
21 is clearly a need for champions, including practitioners, scholars, public servants, and  
22 professional societies who would leverage political affiliations and use empirical evidence to  
23 project surgery into political consciousness at different levels, as has been witnessed in the few  
24 countries that have adopted NSOAPs.<sup>6 84 85</sup>

1  
2  
3 1 Another direct consequence of the national level neglect of surgery in SSA is the literature  
4  
5 2 lacuna on surgical allocations and expenditures, as revealed in this review, contrary to the  
6  
7 3 LCGS recommendations. In a further search for possible insights, we reviewed five SSA  
8  
9 4 NSOAPs that were accessible via Google (Ethiopia, Nigeria, Rwanda, Tanzania, and Zambia)  
10  
11 5 and found that none had any data related to national financial allocations to surgery or actual  
12  
13 6 expenditures, while only the Nigeria and Rwanda NSOAPs had information on hospital  
14  
15 7 allocations to surgery. This finding is neither new nor limited to SSA: Meara et al (2015)  
16  
17 8 reviewed 958 national health accounts published between 1996 and 2010 in LIMCs and  
18  
19 9 reported that only Georgia and Kyrgyzstan routinely reported expenditures on surgery;<sup>2</sup> and a  
20  
21 10 2015 systematic review of UHC programmes in LIMCs showed surgeries were systematically  
22  
23 11 excluded from national UHC packages.<sup>86</sup> This limited evidence shows the lack of substantial  
24  
25 12 progress, five years after the LCGS recommendations, suggesting minimal scholarly interest  
26  
27 13 in the subject. The upward trend recorded in the volume of studies from 2015 is nonetheless  
28  
29 14 welcome and should be sustained and intensified.

30  
31  
32  
33  
34  
35  
36 15 Poor pooling functions across SSA mean that access to surgical care still correlates strongly  
37  
38 16 with socioeconomic status, resulting, among the poor, in disinclination to seek care,  
39  
40 17 catastrophic expenditures for those who dare to seek care, disruptions in care stream, and  
41  
42 18 consequential inequities in health outcomes affecting especially the poor. The successes  
43  
44 19 recorded with CHIF in Rwanda<sup>87</sup> and NHIF in Ghana<sup>88</sup> might serve as examples to be built  
45  
46 20 upon by other countries. Meanwhile, as laudable as health insurance and UPF interventions  
47  
48 21 are, the most important message from this study is that just removing or subsidizing user fees  
49  
50 22 is not enough. Aside from the associated technical complexities that must be addressed,  
51  
52 23 numerous other non-medical cost elements hampering universal access to surgical care remain,  
53  
54 24 including transport, food, accommodation, and loss of earnings. As such, even if all the direct  
55  
56 25 medical costs were covered at the national or facility level, some patients would remain simply  
57  
58  
59  
60

1 too poor to obtain even “free” surgical care.<sup>89</sup> The particular contexts of low-income countries  
2 ought to be understood and addressed appropriately using more comprehensive policy designs.  
3 This study reveals important priorities for future research. First, there is need to explore the  
4 current national level mobilization and allocation patterns and track the available resources  
5 throughout the system to inform best policy directions.<sup>7</sup> Second, numerous studies have  
6 established the vulnerabilities faced by the poor due to inadequacies in protection measures,  
7 but few have explored optimal financial protection strategies given the socioeconomic realities  
8 in SSA.<sup>78 90</sup> More evidence in this regard will aid contextualised policy formulation. Further,  
9 the literature is particularly scanty on the purchasing aspects of surgical services: a deeper  
10 understanding of interactions between hospital reimbursement patterns and personnel  
11 remuneration systems on one hand and surgical service delivery on the other hand will  
12 engender value-based purchasing mechanisms and ensure maximization of surgical output with  
13 the limited available resources.<sup>2</sup> Lastly, as national and subnational governments in SSA  
14 continue to pursue free obstetric care policies, the literature remains divided on their exact  
15 impacts on CS rates. More rigorous studies are recommended to resolve the conflicts and  
16 explore the factors that may account for different outcomes in different countries.

17 Wide variations found in approaches to the estimation of catastrophic expenditures across the  
18 articles call for a special note. Health expenses are described as “catastrophic” if they exceed  
19 a certain threshold proportion of household income/expenditure or capacity to pay,<sup>91</sup> but lack  
20 of unanimity remains in the thresholds applied.<sup>42 91</sup> In addition, cost elements considered in the  
21 calculations also differed, with some covering only direct medical cost,<sup>40 64</sup> others including  
22 direct non-medical costs,<sup>29 67</sup> and still others extending to indirect costs.<sup>41 53 92</sup> Moreover,  
23 definitions of direct and indirect costs were inconsistent. Given the cardinal position this metric  
24 has assumed in financial protection analyses, uniformity in approaches is particularly  
25 imperative, and to achieve this, we advocate adherence to the definition and methodology

1  
2  
3 1 adopted by the WHO and the World Bank for indicator 3.8.2 of the Sustainable Development  
4  
5 2 Goals (SDGs) which monitors the financial protection dimension of universal health  
6  
7 coverage.<sup>93 94</sup>  
8  
9

#### 10 4 **Limitations**

11  
12  
13  
14 5 The first limitation of this study is that associated with scoping reviews generally, which is that  
15  
16 6 they often do not evaluate the quality of the evidence presented, thus putting the results at high  
17  
18 7 risk of bias and diminishing the possibilities of drawing definitive conclusions therefrom.  
19  
20 8 Further, while our study aimed to collate findings from different countries for the consumption  
21  
22 9 of policymakers and stakeholders in individual countries, it is not clear to what extent findings  
23  
24 10 or policy lessons from one country could be applicable in another country. Overall, however,  
25  
26 11 we think that the use of two parallel reviewers and an arbiter, in line with best practices,  
27  
28 12 improved the quality of the work, and that the work nonetheless provides some useful insights  
29  
30 13 for policymakers across SSA.  
31  
32  
33  
34

#### 35 14 **Conclusion**

36  
37  
38 15 This study has provided a situational analysis of financing of surgery and anaesthesia in SSA  
39  
40 16 while summarising the current knowledge on the subject. The resources available for surgery  
41  
42 17 are limited due in part to the neglect of surgery in national priorities, making it difficult for  
43  
44 18 hospitals to provide the full package of surgical services. Surgery services are unaffordable for  
45  
46 19 the great majority of populations, resulting in financial catastrophes and/ or impoverishments.  
47  
48 20 Findings in this review could guide national policy makers in SSA, especially those  
49  
50 21 implementing or developing NSOAPs, in adopting more comprehensive and inclusive  
51  
52 22 measures to enhance access to SOA services, while steering research towards critical  
53  
54 23 unanswered questions.  
55  
56  
57  
58

#### 59 24 **Author Contributions**

60

1  
2  
3 1 MI conceived the study. MI, EA and LB designed the study, conducted the search and analysed  
4  
5 2 the data. MI and EA drafted the first manuscript. MI, EA, MS, JG, CP, JK, EB, RB, RB, LB  
6  
7 3 contributed to data interpretation, and critically reviewed and edited the first draft. MI, EA,  
8  
9 4 MS, JG, CP, JK, EB, RB, RB, LB read and approved the final manuscript. LB supervised the  
10  
11 5 study.  
12  
13  
14

## 15 6 **Acknowledgements**

17 7 We are grateful to Dr Henk Broekhuizen (Department of Social Sciences, Wageningen  
18  
19 8 University) for his help in the conceptualization of the study. The authors also wish to  
20  
21 9 appreciate information specialists Elmie Peters and Dr On Ying Chan of Radboud University  
22  
23 10 Medical Library, and Paul Murphy of Royal College of Surgeons in Ireland (RCSI) Library,  
24  
25 11 for their technical assistance in the development and execution of the literature search strategy;  
26  
27 12 and Jos Peters of Radboud University Medical Library who assisted in the acquisition of the  
28  
29 13 full texts of the articles.  
30  
31  
32  
33  
34  
35

## 36 15 **Competing Interests**

37  
38 16 The authors declare no competing interests  
39  
40

## 41 17 **Funding**

42 18 This work was supported by European Commission's Horizon 2020 Framework Programme,  
43  
44 19 under grant agreement no: 733391, as part of the Scaling up Safe Surgery for District and Rural  
45  
46 20 Populations in Africa (SURG-Africa) project.  
47  
48 21

## 49 22 **Ethical Approval**

50  
51 23 Not Applicable  
52  
53 24

## 54 25 **Data Availability Statement**

55  
56 26 Extra data is available by emailing author MI ([Martilord.ifeanyichi@radboudumc.nl](mailto:Martilord.ifeanyichi@radboudumc.nl))  
57  
58 27  
59  
60



## 1 References

1. Alkire BC, Raykar NP, Shrimme MG, et al. Global access to surgical care: A modelling study. *The Lancet Global Health* 2015;3(6):e316-e23. doi: <http://dx.doi.org/10.1016/S2214-109X%2815%2970115-4>
2. Meara JG, Leather AJM, Hagander L, et al. Global Surgery 2030: Evidence and solutions for achieving health, welfare, and economic development. *The Lancet* 2015;386(9993):569-624. doi: <http://dx.doi.org/10.1016/S0140-6736%2815%2960160-X>
3. WHO. Health systems: improving performance: World Health Organization; 2000 [Available from: <https://www.who.int/whr/2000/en/> accessed 5th June 2020.
4. Evans DB, Etienne C. Health systems financing and the path to universal coverage: SciELO Public Health, 2010.
5. World Development Indicators: The World Bank; 2019 [Available from: <https://databank.worldbank.org/source/world-development-indicators> accessed March 2021.
6. Truche P, Shoman H, Reddy CL, et al. Globalization of national surgical, obstetric and anesthesia plans: The critical link between health policy and action in global surgery. *Globalization and Health* 2020;16(1) doi: <http://dx.doi.org/10.1186/s12992-019-0531-5>
7. WHO. Situation analysis of the health sector: World Health Organisation; 2016 [Available from: <https://www.who.int/healthsystems/publications/nhpsp-handbook-ch3/en/> accessed June 15 2020.
8. Nyberger K, Jumbam DT, Dahm J, et al. The Situation of Safe Surgery and Anaesthesia in Tanzania: A Systematic Review. *World Journal of Surgery* 2019;43(1):24-35. doi: <http://dx.doi.org/10.1007/s00268-018-4767-7>
9. Colquhoun HL, Levac D, O'Brien KK, et al. Scoping reviews: time for clarity in definition, methods, and reporting. *J Clin Epidemiol* 2014;67(12):1291-94.
10. Arksey H, O'Malley L. Scoping studies: towards a methodological framework. *Int J Soc Res Methodol: Theory & Practice* 2005;8(1):19-32.
11. Levac D, Colquhoun H, O'Brien KK. Scoping studies: advancing the methodology. *Implement Sci* 2010;5(1):69.
12. Micah Peters CG, Patricia McInerney, Zachary Munn, Andrea Tricco, Hanan Khalil. Scoping Reviews. In: Aromataris E MZ, ed. JBI Manual for Evidence Synthesis, JBI, 2020 Available from <https://synthesismanualjbiglobal> <https://doi.org/1046658/JBIMES-20-122020>.
13. Mourad Ouzzani HH, Zbys Fedorowicz, and Ahmed Elmagarmid. Rayyan — a web and mobile app for systematic reviews. 2016 [Available from: <https://rayyan.qcri.org/welcome> accessed July 30 2020.
14. Braun V, Clarke V. Using thematic analysis in psychology. *Qualitative Research in Psychology* 2006;3(2):77-101.
15. Moher D, Liberati A, Tetzlaff J, et al. Preferred reporting items for systematic reviews and meta-analyses: the PRISMA statement. *PLoS Med* 2009;6(7):e1000097.
16. Tricco AC, Lillie E, Zarin W, et al. PRISMA extension for scoping reviews (PRISMA-ScR): checklist and explanation. *Ann Intern Med* 2018;169(7):467-73.
17. Citron I, Chokocho L, Lavy C. Prioritisation of Surgery in the National Health Strategic Plans of Africa: A Systematic Review. *World Journal of Surgery* 2016;40(4):779-83. doi: <http://dx.doi.org/10.1007/s00268-015-3333-9>
18. Iverson KR, Garringer K, Ahearn O, et al. Mixed-methods assessment of surgical capacity in two regions in Ethiopia. *British Journal of Surgery* 2019;106(2):e81-e90. doi: <http://dx.doi.org/10.1002/bjs.11032>
19. DeGregorio G, Manga S, Kiyang E, et al. Implementing a Fee-for-Service Cervical Cancer Screening and Treatment Program in Cameroon: Challenges and Opportunities. *Oncologist*

- 2017;22(7):850-59. doi: 10.1634/theoncologist.2016-0383 [published Online First: 2017/05/26]
20. Rakotondrajoa P, Rakotomamonjy T, Baptiste RJ, et al. Achieving self-sustainability of service delivery in an eye care program in Madagascar using time-driven activity based costing. *BMC health services research* 2020;20(1):205. doi: <http://dx.doi.org/10.1186/s12913-020-05074-z>
21. Ekenze SO, Jac-Okereke CA, Nwankwo EP. Funding paediatric surgery procedures in sub-Saharan Africa. *Malawi Medical Journal : the journal of Medical Association of Malawi* 2019;31(3):233-40. doi: <http://dx.doi.org/10.4314/mmj.v31i3.13>
22. Cornelissen D, Mwapasa G, Gajewski J, et al. The Cost of Providing District-Level Surgery in Malawi. *World Journal of Surgery* 2018;42(1):46-53. doi: <http://dx.doi.org/10.1007/s00268-017-4166-5>
23. Kruk ME, Wladis A, Mbembati N, et al. Human resource and funding constraints for essential surgery in district hospitals in africa: A retrospective cross-sectional survey. *PLoS Medicine* 2010;7(3):1-11. doi: <http://dx.doi.org/10.1371/journal.pmed.1000242>
24. Sion M, Rajan D, Kalambay H, et al. A resource planning analysis of district hospital surgical services in the Democratic Republic of the Congo. *Global health, science and practice* 2015;3(1):56-70. doi: <http://dx.doi.org/10.9745/GHSP-D-14-00165>
25. Adoga A, Nimkur T, Silas O. Chronic suppurative otitis media: Socio-economic implications in a tertiary hospital in Northern Nigeria. *Pan African Medical Journal* 2010;4(no pagination)
26. Nnabugwu II, Ugwumba FO, Ede JK. Second-phase delay in accessing major elective surgeries from a public tertiary health institution in Nigeria: the role of financial constraints. *International Journal of Medicine and Health Development* 2019;24(2):89-94. doi: [http://dx.doi.org/10.4103/ijmh.IJMH\\_16\\_19](http://dx.doi.org/10.4103/ijmh.IJMH_16_19)
27. Obembe T, Fonn S. Affording unavoidable emergency surgical care - The lived experiences and payment coping strategies of households in Ibadan metropolis, Southwestern Nigeria. *PLoS ONE* 2020;15(5) doi: <http://dx.doi.org/10.1371/journal.pone.0232882>
28. Ugalahi MO, Olusanya BA, Fagbemi OO, et al. Delays in uptake of surgery for childhood cataract at a child eye health tertiary facility in sub-Saharan Africa. *European Journal of Ophthalmology* 2020;30(2):280-83. doi: <http://dx.doi.org/10.1177/1120672119827770>
29. Urua U, Osungbade K, Obembe T, et al. A cost analysis of road traffic injuries in a tertiary hospital in south-west Nigeria. *International journal of injury control and safety promotion* 2017;24(4):510-18. doi: <http://dx.doi.org/10.1080/17457300.2016.1278238>
30. Frimpong-Boateng K, Edwin F. Surgical leadership in Africa - challenges and opportunities. *Innov Surg Sci* 2019;4(2):59-64. doi: 10.1515/iss-2018-0036 [published Online First: 2019/10/04]
31. Reddy CL, Peters AW, Jumbam DT, et al. Innovative financing to fund surgical systems and expand surgical care in low-income and middle-income countries. *BMJ global health* 2020;5(6):e002375.
32. Butler EK, Tran TM, Fuller AT, et al. Pilot study of a population-based survey to assess the prevalence of surgical conditions in Uganda. *Surgery (United States)* 2015;158(3):764-72. doi: <http://dx.doi.org/10.1016/j.surg.2015.05.011>
33. Bouglouga O, Lawson-Ananissoh LM, Bagny A, et al. [Stomach cancer: Epidemiological, clinical and histological aspects at the Lome Campus teaching hospital (Togo)]. *Med Sante Trop* 2015;25(1):65-8. doi: 10.1684/mst.2014.0415 [published Online First: 2015/03/20]
34. Lerman BJ, Alsan M, Chia NJ, et al. Beyond Infrastructure: Understanding Why Patients Decline Surgery in the Developing World. *Annals of Surgery* 2017;266(6):975-80. doi: <http://dx.doi.org/10.1097/SLA.0000000000002002>
35. Onyebuchi AK, Lawani LO, Nkwon PO, et al. Determinants of decision-to-intervention time in the management and therapeutic outcome of emergency gynecological surgeries in south east Nigeria. *Therapeutics and Clinical Risk Management* 2014;10(1):577-82. doi: <http://dx.doi.org/10.2147/TCRM.S66897>

- 1  
2  
3 1 36. Lankoande M, Bonkougou P, Traore SIS, et al. Cancellation of elective surgical procedures in the  
4 2 university teaching hospital center yalgado ouedraogo in Burkina Faso: Incidence, reasons  
5 3 and proposals for improvement. *Southern African Journal of Anaesthesia and Analgesia*  
6 4 2016;22(5):140-44. doi: <http://dx.doi.org/10.1080/22201181.2016.1226539>  
7 4  
8 5 37. Takongmo S, Yomi J, Guifo ML, et al. Neoadjuvant chemotherapy in the treatment of advanced  
9 6 and inflammatory breast cancer in Yaounde (Cameroon). [French]. *Journal Africain du Cancer*  
10 7 2011;3(3):175-79. doi: <http://dx.doi.org/10.1007/s12558-011-0165-x>  
11 8  
12 9 38. Aboobaker S, Courtright P. Barriers to cataract surgery in Africa: A systematic review. *Middle East*  
13 10 *African Journal of Ophthalmology* 2016;23(1):145-49. doi: <http://dx.doi.org/10.4103/0974-9233.164615>  
14 11  
15 12 39. Stanton MC, Best A, Cliffe M, et al. Situational analysis of lymphatic filariasis morbidity in Ahanta  
16 13 West District of Ghana. *Tropical Medicine and International Health* 2016;21(2):236-44. doi:  
17 14 <http://dx.doi.org/10.1111/tmi.12643>  
18 15  
19 16 40. Shrimel MG, Dare A, Alkire BC, et al. A global country-level comparison of the financial burden of  
20 17 surgery. *Br J Surg* 2016;103(11):1453-61. doi: 10.1002/bjs.10249 [published Online First:  
21 18 2016/07/19]  
22 19  
23 20 41. Bijlmakers L, Wientjes M, Mwapasa G, et al. Out-of-pocket payments and catastrophic household  
24 21 expenditure to access essential surgery in Malawi - A cross-sectional patient survey. *Annals*  
25 22 *of Medicine and Surgery* 2019;43:85-90. doi: <http://dx.doi.org/10.1016/j.amsu.2019.06.003>  
26 23  
27 24 42. Arsenault C, Fournier P, Philibert A, et al. Emergency obstetric care in Mali: Catastrophic  
28 25 spending and its impoverishing effects on households. *Bulletin of the World Health*  
29 26 *Organization* 2013;91(3):207-16. doi: <http://dx.doi.org/10.2471/BLT.12.108969>  
30 27  
31 28 43. Nnabugwu II, Nwankwor C, Ugwumba F. Gaining access to major elective surgeries in a public  
32 29 tertiary health institution in southeast Nigeria: Evaluating household payment coping  
33 30 strategies. *Annals of African Surgery* 2019;16(2):69-74. doi:  
34 31 <http://dx.doi.org/10.4314/aas.v16i2.6>  
35 32  
36 33 44. Anderson GA, Ilcisin L, Kayima P, et al. Out-of-pocket payment for surgery in Uganda: The rate of  
37 34 impoverishing and catastrophic expenditure at a government hospital. *PLoS ONE*  
38 35 2017;12(10) doi: <http://dx.doi.org/10.1371/journal.pone.0187293>  
39 36  
40 37 45. Ibrahim N, Ramke J, Pozo-Martin F, et al. Willingness to pay for cataract surgery is much lower  
41 38 than actual costs in Zamfara state, northern Nigeria. *Ophthalmic Epidemiology*  
42 39 2018;25(3):227-33. doi: <http://dx.doi.org/10.1080/09286586.2017.1408845>  
43 40  
44 41 46. Dean WH, Sherwin JC, Kumwenda S, et al. Willingness to pay for cataract surgery in post-  
45 42 operative cataract patients in rural Malawi. *Ophthalmic Epidemiol* 2012;19(5):265-71. doi:  
46 43 10.3109/09286586.2012.708085 [published Online First: 2012/09/18]  
47 44  
48 45 47. Dim CC, Onyedum CC, Dim NR, et al. Cervical Cancer Screening among HIV-Positive Women in  
49 46 Nigeria: An Assessment of Use and Willingness to Pay in the Absence of Donor Support. *J Int*  
50 47 *Assoc Provid AIDS Care* 2015;14(3):241-4. doi: 10.1177/2325957413488191 [published  
51 48 Online First: 2013/06/01]  
52 49  
53 50 48. Groen RS, Kamara TB, Nwomeh BC, et al. Free health care for under 5 year olds increases access  
54 51 to surgical care in Sierra Leone: an analysis of case load and patient characteristics. *World J*  
55 52 *Surg* 2013;37(6):1216-9. doi: 10.1007/s00268-013-1993-x [published Online First:  
56 53 2013/03/23]  
57 54  
58 55 49. McKinnon B, Harper S, Kaufman JS, et al. Removing user fees for facility-based delivery services:  
59 56 a difference-in-differences evaluation from ten sub-Saharan African countries. *Health Policy*  
60 57 *Plan* 2015;30(4):432-41. doi: 10.1093/heapol/czu027 [published Online First: 2014/05/13]  
61 58  
62 59 50. Witter S, Boukhalfa C, Cresswell JA, et al. Cost and impact of policies to remove and reduce fees  
63 60 for obstetric care in Benin, Burkina Faso, Mali and Morocco. *International Journal for Equity*  
64 61 *in Health* 2016;15(1) doi: <http://dx.doi.org/10.1186/s12939-016-0412-y>  
65 62  
66 63 51. Witter S, Dieng T, Mbengue D, et al. The national free delivery and caesarean policy in Senegal:  
67 64 evaluating process and outcomes. *Health policy and planning* 2010;25(5):384-92.

- 1  
2  
3  
4  
5  
6  
7  
8  
9  
10  
11  
12  
13  
14  
15  
16  
17  
18  
19  
20  
21  
22  
23  
24  
25  
26  
27  
28  
29  
30  
31  
32  
33  
34  
35  
36  
37  
38  
39  
40  
41  
42  
43  
44  
45  
46  
47  
48  
49  
50  
51  
52  
53  
54  
55  
56  
57  
58  
59  
60
- 1 52. Witter S, Khalid Mousa K, Abdel-Rahman ME, et al. Removal of user fees for caesareans and  
2 under-fives in northern Sudan: a review of policy implementation and effectiveness. *The*  
3 *International journal of health planning and management* 2013;28(1):e95-e120. doi:  
4 <http://dx.doi.org/10.1002/hpm.2146>
- 5 53. MacKinnon N, St-Louis E, Yousef Y, et al. Out-of-Pocket and Catastrophic Expenses Incurred by  
6 Seeking Pediatric and Adult Surgical Care at a Public, Tertiary Care Centre in Uganda. *World*  
7 *journal of surgery* 2018;42(11):3520-27. doi: <http://dx.doi.org/10.1007/s00268-018-4691-x>
- 8 54. Ouedraogo TL, Kpozehouen A, Glegle-Hessou Y, et al. [Evaluation of free cesarean sections in  
9 Benin]. [French]. *Sante publique (Vandoeuvre-les-Nancy, France)* 2013;25(4):507-15.
- 10 55. Mongbo V, Ouendo EM, De Brouwere V, et al. Quality of caesarean delivery: A cross-sectional  
11 study in 12 hospitals in Benin. *Revue d'Epidemiologie et de Sante Publique* 2016;64(4):281-  
12 93. doi: <http://dx.doi.org/10.1016/j.respe.2016.02.009>
- 13 56. Lange IL, Kanhonou L, Goufodji S, et al. The costs of 'free': Experiences of facility-based childbirth  
14 after Benin's caesarean section exemption policy. *Social Science and Medicine* 2016;168:53-  
15 62. doi: <http://dx.doi.org/10.1016/j.socscimed.2016.09.008>
- 16 57. Keya KT, Sripad P, Nwala E, et al. "Poverty is the big thing": Exploring financial, transportation,  
17 and opportunity costs associated with fistula management and repair in Nigeria and Uganda.  
18 *International Journal for Equity in Health* 2018;17(1) doi: [http://dx.doi.org/10.1186/s12939-](http://dx.doi.org/10.1186/s12939-018-0777-1)  
19 [018-0777-1](http://dx.doi.org/10.1186/s12939-018-0777-1)
- 20 58. Dankwah E, Kirychuk S, Zeng W, et al. Socioeconomic inequalities in the use of caesarean section  
21 delivery in Ghana: A cross-sectional study using nationally representative data. *International*  
22 *Journal for Equity in Health* 2019;18(1) doi: <http://dx.doi.org/10.1186/s12939-019-1063-6>
- 23 59. Leone T, Cetorelli V, Neal S, et al. Financial accessibility and user fee reforms for maternal  
24 healthcare in five sub-Saharan countries: A quasi-experimental analysis. *BMJ Open* 2016;6(1)  
25 doi: [http://dx.doi.org/10.1136/bmjopen-](http://dx.doi.org/10.1136/bmjopen-2015-009692)  
26 [2015-009692](http://dx.doi.org/10.1136/bmjopen-2015-009692)
- 27 60. El-Khoury M, Hatt L, Gandaho T. User fee exemptions and equity in access to caesarean sections:  
28 An analysis of patient survey data in Mali. *International Journal for Equity in Health*  
29 2012;11(1) doi: <http://dx.doi.org/10.1186/1475-9276-11-49>
- 30 61. Ravit M, Audibert M, Ridde V, et al. Do free caesarean section policies increase inequalities in  
31 Benin and Mali? *International Journal for Equity in Health* 2018;17(1) doi:  
32 <http://dx.doi.org/10.1186/s12939-018-0789-x>
- 33 62. Toure L. User fee exemption policies in Mali: sustainability jeopardized by the malfunctioning of  
34 the health system. *BMC health services research* 2015;15(Supplement 3):S8. doi:  
35 <http://dx.doi.org/10.1186/1472-6963-15-S3-S8>
- 36 63. Ridde V, Richard F, Bicaba A, et al. The national subsidy for deliveries and emergency obstetric  
37 care in Burkina Faso. *Health Policy Plan* 2011;26 Suppl 2:ii30-40. doi: 10.1093/heapol/czr060  
38 [published Online First: 2011/11/02]
- 39 64. Seyi-Olajide JO, Anderson J, Enivwaene AO, et al. Catastrophic Healthcare Expenditure from  
40 Typhoid Perforation in Children in Nigeria. *Surgical infections* 2020;18 doi:  
41 <http://dx.doi.org/10.1089/sur.2020.134>
- 42 65. Coulibaly Y, Togo A, Keita M, et al. Cost of care for pediatric patients undergoing surgery at the  
43 University Hospital Gabriel Toure. [French]. *Medecine d'Afrique Noire* 2010;57(4):198-202.
- 44 66. Mwandri M, Hardcastle TC, Sawe H, et al. Trauma burden, patient demographics and care-  
45 process in major hospitals in Tanzania: A needs assessment for improving healthcare  
46 resource management. *African Journal of Emergency Medicine* 2020 doi:  
47 <http://dx.doi.org/10.1016/j.afjem.2020.01.010>
- 48 67. Honda A, Randaoharison PG, Matsui M. Affordability of emergency obstetric and neonatal care  
49 at public hospitals in Madagascar. *Reproductive Health Matters* 2011;19(37):10-20. doi:  
50 <http://dx.doi.org/10.1016/S0968-8080%2811%2937559-3>

- 1  
2  
3 1 68. Mostert S, Njuguna F, van de Ven PM, et al. Influence of health-insurance access and hospital  
4 2 retention policies on childhood cancer treatment in Kenya. *Pediatric Blood and Cancer*  
5 3 2014;61(5):913-18. doi: <http://dx.doi.org/10.1002/pbc.24896>  
6 4  
7 4 69. Blankson PK, Nonvignon J, Aryeetey G, et al. Injuries and their related household costs in a  
8 5 tertiary hospital in Ghana. *African Journal of Emergency Medicine* 2020 doi:  
9 6 <http://dx.doi.org/10.1016/j.afjem.2020.04.004>  
10 7  
11 7 70. Rickard JL, Ngarambe C, Ndayizeye L, et al. Risk of Catastrophic Health Expenditure in Rwandan  
12 8 Surgical Patients with Peritonitis. *World journal of surgery* 2018;42(6):1603-09. doi:  
13 9 <http://dx.doi.org/10.1007/s00268-017-4368-x>  
14 10  
15 10 71. Adeniran AS, Aun II, Fawole AA, et al. Comparative analysis of caesarean delivery among out-of-  
16 11 pocket and health insurance clients in Ilorin, Nigeria. *The Nigerian postgraduate medical*  
17 12 *journal* 2020;27(2):108-14. doi: [http://dx.doi.org/10.4103/npmj.npmj\\_181\\_19](http://dx.doi.org/10.4103/npmj.npmj_181_19)  
18 13  
19 13 72. Rajaguru PP, Jusabani MA, Massawe H, et al. Understanding surgical care delivery in Sub-Saharan  
20 14 Africa: a cross-sectional analysis of surgical volume, operations, and financing at a tertiary  
21 15 referral hospital in rural Tanzania. *Glob Health Res Policy* 2019;4:30. doi: 10.1186/s41256-  
22 16 019-0122-2 [published Online First: 2019/11/02]  
23 17  
24 17 73. Gichuru S, Kedera T, Wanjeri J, et al. Predictors of post-mastectomy breast reconstruction in  
25 18 Kenya. *Annals of African Surgery* 2020;17(1):16-20. doi:  
26 19 <http://dx.doi.org/10.4314/aas.v17i1.5>  
27 20  
28 20 74. Okoroh J, Sarpong DOB, Essoun S, et al. Does insurance protect individuals from catastrophic  
29 21 payments for surgical care? An analysis of Ghana's National Health Insurance Scheme at  
30 22 Korle-Bu teaching Hospital. *BMC health services research* 2020;20(1):45. doi:  
31 23 <http://dx.doi.org/10.1186/s12913-020-4887-2>  
32 24  
33 24 75. Bonfrer I, Breebaart L, De Poel EV. The effects of Ghana's national health insurance scheme on  
34 25 maternal and infant health care utilization. *PLoS ONE* 2016;11(11) doi:  
35 26 <http://dx.doi.org/10.1371/journal.pone.0165623>  
36 27  
37 27 76. Stewart BT, Gyedu A, Abantanga F, et al. Barriers to essential surgical care in low- and middle-  
38 28 income countries: a pilot study of a comprehensive assessment tool in Ghana. *World Journal*  
39 29 *of Surgery* 2015;39(11):2613-21. doi: <http://dx.doi.org/10.1007/s00268-015-3168-4>  
40 30  
41 30 77. Dienne PO, Brisibe SF, Eke R. Sources of healthcare financing among surgical patients in a rural  
42 31 Niger Delta practice in Nigeria. *Rural and remote health* 2011;11:1577.  
43 32  
44 32 78. Shrimel MG, Sekidde S, Linden A, et al. Sustainable development in surgery: The health, poverty,  
45 33 and equity impacts of charitable surgery in Uganda. *PLoS ONE* 2016;11(12) doi:  
46 34 <http://dx.doi.org/10.1371/journal.pone.0168867>  
47 35  
48 35 79. Shrimel MG, Verguet S, Johansson KA, et al. Task-sharing or public finance for expanding surgical  
49 36 access in rural Ethiopia: an extended cost-effectiveness analysis: Disease control priorities,  
50 37 third edition: Volume 1. Essential surgery; 2015. :339-352. many ref. 2015.  
51 38  
52 38 80. Holoyda KA, Farhat B, Lalonde DH, et al. Creating an Outpatient, Local Anesthetic Hand  
53 39 Operating Room in a Resource-Constrained Ghanaian Hospital Builds Surgical Capacity and  
54 40 Financial Stability. *Annals of plastic surgery* 2020;84(4):385-89. doi:  
55 41 <http://dx.doi.org/10.1097/SAP.0000000000002196>  
56 42  
57 42 81. Gnassingbe K, Tekou H, Da Silva-Anoma S, et al. The paediatric surgeon and his working  
58 43 conditions in Francophone sub-Saharan Africa. *African Journal of Paediatric Surgery*  
59 44 2011;8(3):298-300. doi: <http://dx.doi.org/10.4103/0189-6725.91677>  
60 45  
61 45 82. Meda IB, Kouanda S, Dumont A, et al. Effect of a prospective payment method for health  
62 46 facilities on direct medical expenditures in a low-resource setting: a paired pre-post study.  
63 47 *Health policy and planning* 2020;04 doi: <http://dx.doi.org/10.1093/heapol/czaa039>  
64 48  
65 48 83. Janssen W, de Dieu Ngirabega J, Matungwa M, et al. Improving quality through performance-  
66 49 based financing in district hospitals in Rwanda between 2006 and 2010: A 5-year experience.  
67 50 *Tropical Doctor* 2015;45(1):27-35. doi: <http://dx.doi.org/10.1177/0049475514554481>  
68 51  
69 52  
70 53

- 1  
2  
3 1 84. Citron I, Jumbam D, Dahm J, et al. Towards equitable surgical systems: development and  
4 2 outcomes of a national surgical, obstetric and anaesthesia plan in Tanzania. *BMJ Glob Health*  
5 3 2019;4(2):e001282. doi: 10.1136/bmjgh-2018-001282 [published Online First: 2019/05/30]  
6 4  
7 4 85. Sonderman K, Citron I, Mukhopadhyay S, et al. Framework for developing a national surgical,  
8 5 obstetric and anaesthesia plan. *BJS open* 2019  
9 6 86. Okoroh JS, Chia V, Oliver EA, et al. Strengthening health systems of developing countries:  
10 7 inclusion of surgery in universal health coverage. *World journal of surgery* 2015;39(8):1867-  
11 8 74.  
12 9 87. Saksena P, Antunes AF, Xu K, et al. Mutual health insurance in Rwanda: evidence on access to  
13 10 care and financial risk protection. *Health Policy* 2011;99(3):203-9. doi:  
14 11 10.1016/j.healthpol.2010.09.009 [published Online First: 2010/10/23]  
15 12 88. Mensah J, Oppong JR, Schmidt CM. Ghana's National Health Insurance Scheme in the context of  
16 13 the health MDGs: an empirical evaluation using propensity score matching. *Health Econ*  
17 14 2010;19 Suppl:95-106. doi: 10.1002/hec.1633 [published Online First: 2010/08/24]  
18 15 89. Awori J, Strahle J, Okechi H, et al. Implications of patient-borne costs associated with pediatric  
19 16 neurosurgical care in eastern Africa. *Journal of Neurosurgery: Pediatrics* 2016;18(1):116-24.  
20 17 doi: <http://dx.doi.org/10.3171/2015.11.PEDS15445>  
21 18 90. Shrimel MG, Verguet S, Johansson KA, et al. Task-Sharing or Public Finance for Expanding Surgical  
22 19 Access in Rural Ethiopia: An Extended Cost-Effectiveness Analysis. In: Debas HT, Donkor P,  
23 20 Gawande A, et al., eds. *Essential Surgery: Disease Control Priorities, Third Edition (Volume*  
24 21 *1)*. Washington (DC): The International Bank for Reconstruction and Development / The  
25 22 World Bank © 2015 International Bank for Reconstruction and Development / The World  
26 23 Bank. 2015.  
27 24 91. Xu K, Evans DB, Kawabata K, et al. Household catastrophic health expenditure: a multicountry  
28 25 analysis. *The lancet* 2003;362(9378):111-17.  
29 26 92. Yap A, Cheung M, Kakembo N, et al. From procedure to poverty: out-of-pocket and catastrophic  
30 27 expenditure for pediatric surgery in Uganda. *Journal of Surgical Research* 2018;232:484-91.  
31 28 doi: <http://dx.doi.org/10.1016/j.jss.2018.05.077>  
32 29 93. Tracking universal health coverage: 2017 global monitoring report. Geneva: World Health  
33 30 Organisation and International Bank for Reconstruction and Development/TheWorld Bank,  
34 31 2017.  
35 32 94. Monitoring Sustainable Development Goals - Indicator 3.8.2: World Health Organisation; 2020  
36 33 [Available from: [https://www.who.int/health\\_financing/topics/financial-](https://www.who.int/health_financing/topics/financial-protection/monitoring-sdg/en/)  
37 34 [protection/monitoring-sdg/en/](https://www.who.int/health_financing/topics/financial-protection/monitoring-sdg/en/) accessed December 17 2020.  
38  
39  
40  
41  
42 35  
43  
44  
45 36  
46  
47 37  
48  
49  
50  
51  
52  
53  
54  
55  
56  
57  
58  
59  
60

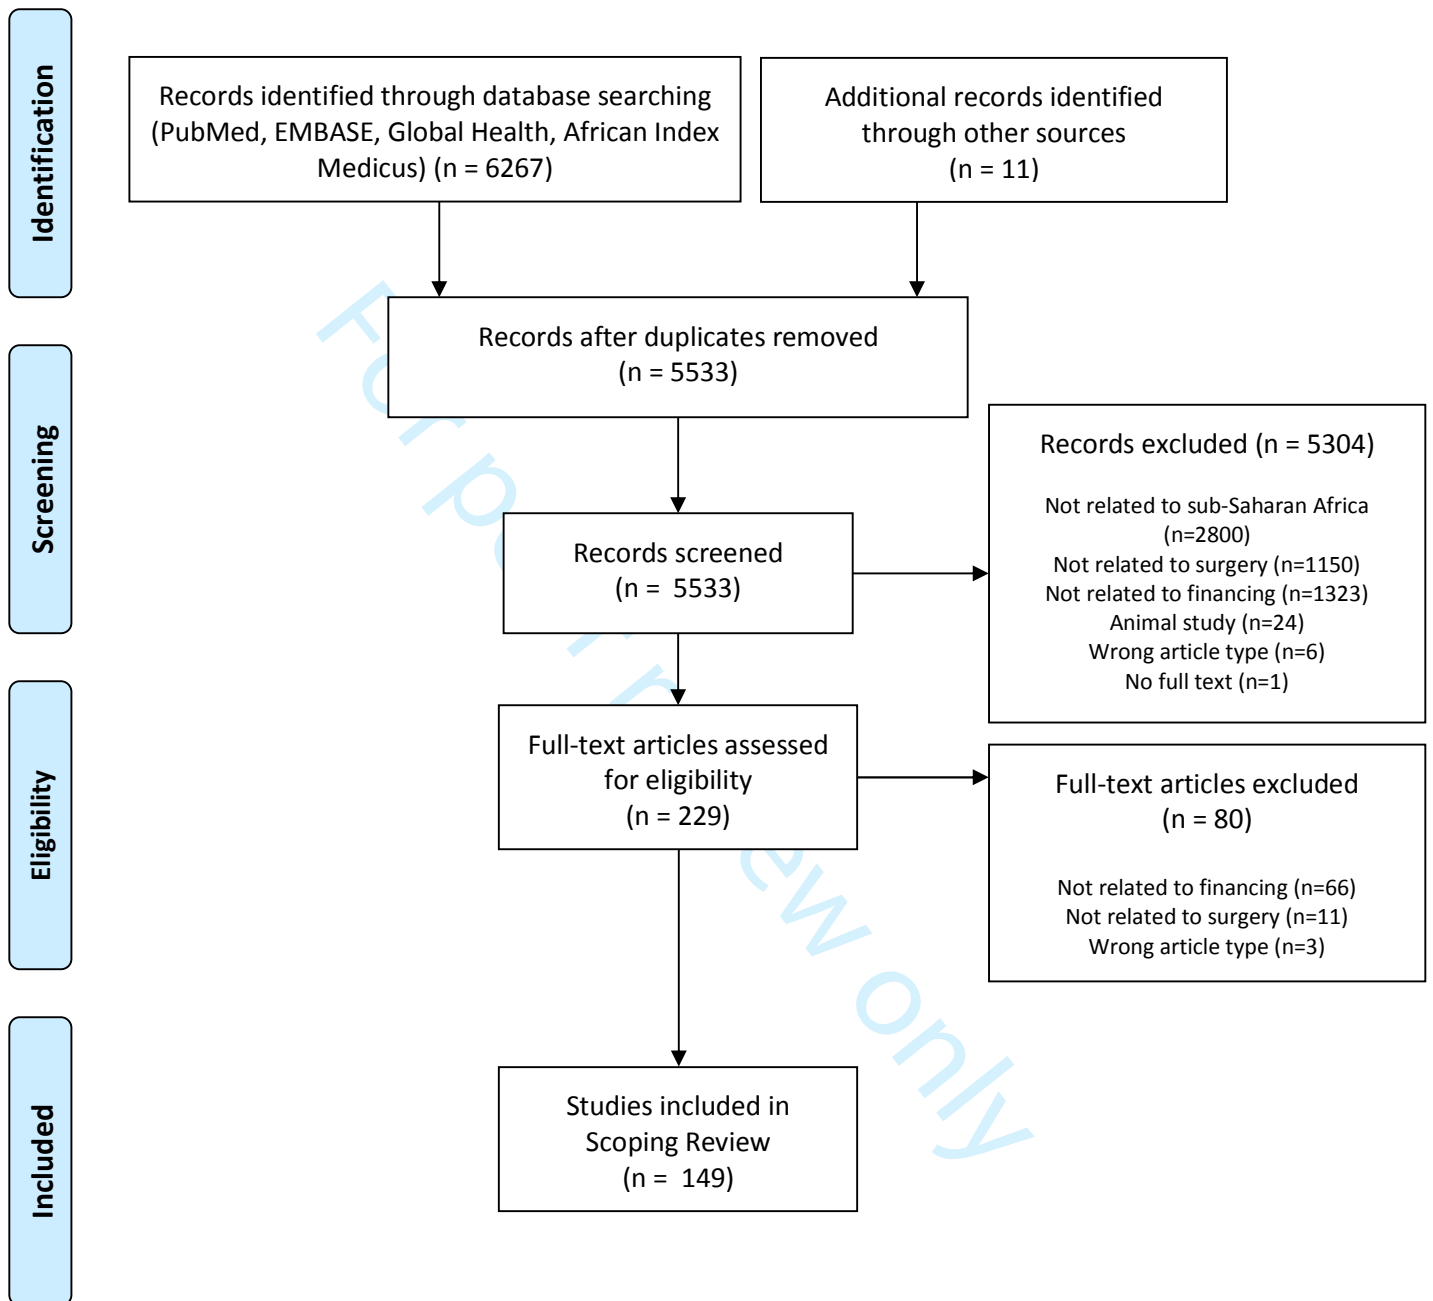

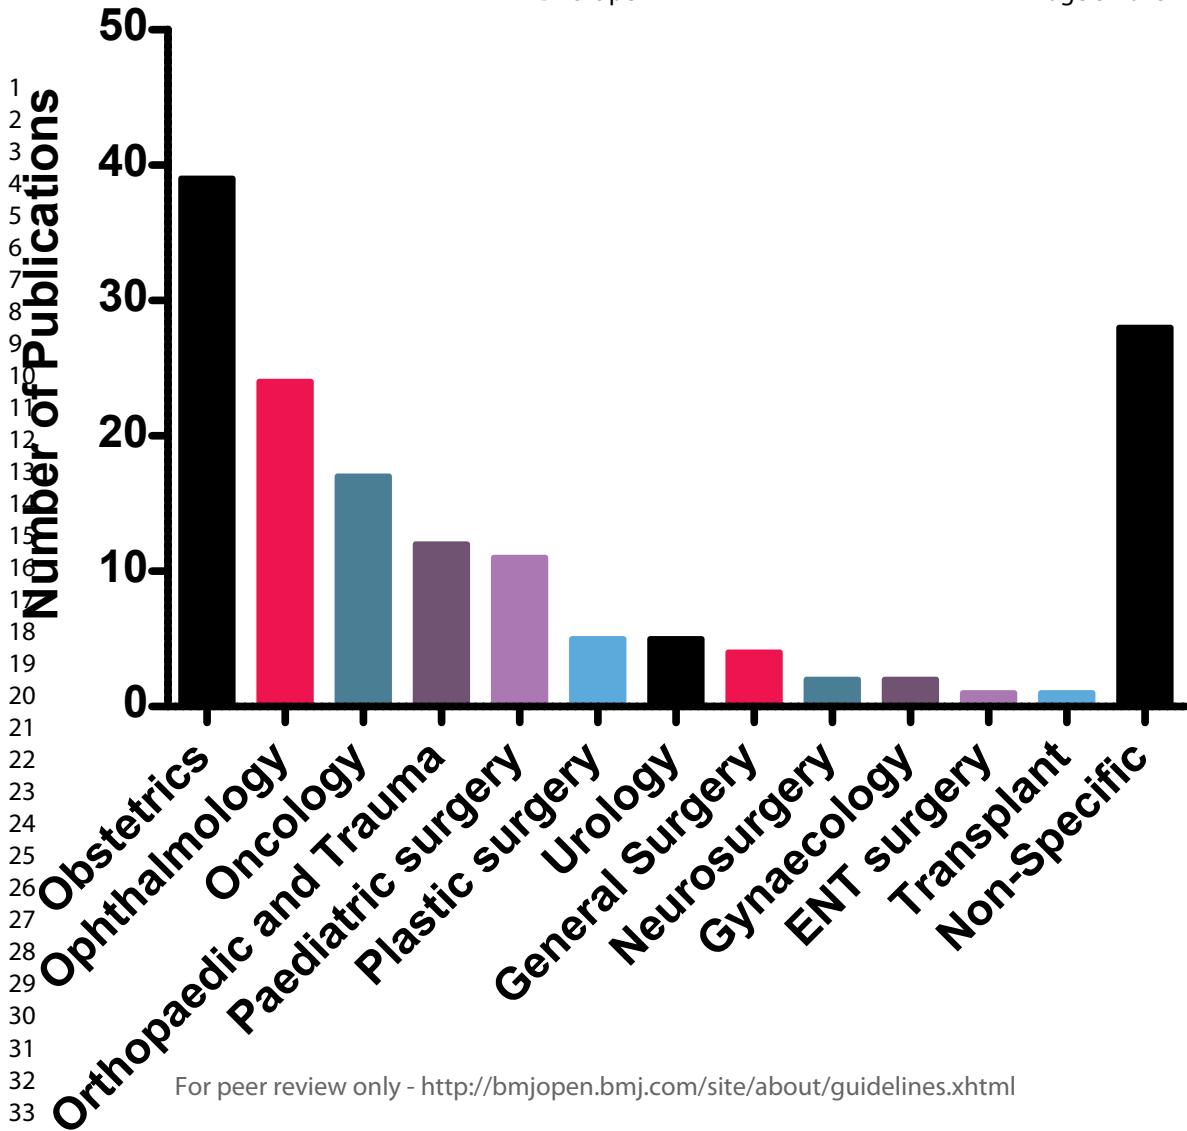



1  
2  
3 **S1: Search Query**  
4

5 **1. PUBMED**  
6

|  |                                                                                                                                                                                                                                                                                                                                                                                                                                                                                                                                                                                                                                                                                                                                                                                                                                                                                                                                                                                                                                                                                                                                                                                                                                                                                                                                                                                                                                                                                                                                                                                                                                                                                                                                                                                                                                                                                                                                                                                                                                                                                                                                                                                                                                                                                                                              |              |
|--|------------------------------------------------------------------------------------------------------------------------------------------------------------------------------------------------------------------------------------------------------------------------------------------------------------------------------------------------------------------------------------------------------------------------------------------------------------------------------------------------------------------------------------------------------------------------------------------------------------------------------------------------------------------------------------------------------------------------------------------------------------------------------------------------------------------------------------------------------------------------------------------------------------------------------------------------------------------------------------------------------------------------------------------------------------------------------------------------------------------------------------------------------------------------------------------------------------------------------------------------------------------------------------------------------------------------------------------------------------------------------------------------------------------------------------------------------------------------------------------------------------------------------------------------------------------------------------------------------------------------------------------------------------------------------------------------------------------------------------------------------------------------------------------------------------------------------------------------------------------------------------------------------------------------------------------------------------------------------------------------------------------------------------------------------------------------------------------------------------------------------------------------------------------------------------------------------------------------------------------------------------------------------------------------------------------------------|--------------|
|  | <p>7 ("Surgical Procedures, Operative"[Mesh] OR "surgery"[subheading] OR anaesthe*[tiab] OR<br/>8 anesthe*[tiab] OR anaesthesia[Mesh] OR "Specialties, Surgical"[Mesh] OR surger*[tiab] OR<br/>9 surgical[tiab]) AND ("Healthcare Financing"[Mesh] OR "Health Policy"[mesh] OR Universal<br/>10 Health Insurance[Mesh] OR "Health Planning"[Mesh] OR "Health Expenditures"[Mesh] OR<br/>11 Expenditure*[tiab] OR "Insurance, Health"[Mesh] OR Health Services/Economics[Mesh] OR<br/>12 Economics[Mesh:NoExp] OR Fund raising[Mesh] OR Health Care Costs[Mesh] OR Fees<br/>13 and Charges[mesh] OR "Financing, Personal"[Mesh] OR budgets[mesh] OR Health<br/>14 Services Accessibility/Economics[Mesh] OR health priorit*[tiab] OR Financ*[tiab] OR<br/>15 Revenue*[tiab] OR Charities/economics[mesh] OR "Universal Health Care"[tiab] OR<br/>16 Universal Health Coverage[tiab] OR "National Health Accounts"[tiab] OR payment*[tiab] OR<br/>17 Budget allocation*[tiab] OR Health Insurance[tiab]) AND ("Africa South of the Sahara"[Mesh]<br/>18 OR Africa*[tiab] OR Cameroon*[tiab] OR Central African Republic*[tiab] OR Congo*[tiab]<br/>19 OR Chad*[tiab] OR Democratic Republic of the Congo*[tiab] OR Equatorial Guinea*[tiab]<br/>20 OR Gabon*[tiab] OR Sao Tome and Principe*[tiab] OR Burundi*[tiab] OR Madagasca*[tiab]<br/>21 OR Comoros*[tiab] OR Mauriti*[tiab] OR Eritrea*[tiab] OR Ethiopia*[tiab] OR Kenya*[tiab]<br/>22 OR Rwanda*[tiab] OR Somalia*[tiab] OR South Sudan*[tiab] OR Sudan*[tiab] OR<br/>23 Tanzania*[tiab] OR Uganda*[tiab] OR Angola*[tiab] OR Botswana*[tiab] OR Lesotho*[tiab]<br/>24 OR Malawi*[tiab] OR Mozambi*[tiab] OR Namibia*[tiab] OR South Africa*[tiab] OR<br/>25 Swaziland*[tiab] OR Zambia*[tiab] OR Zimbabwe*[tiab] OR Benin*[tiab] OR Burkina<br/>26 Faso*[tiab] OR Cabo Verde*[tiab] OR Cote d'Ivoire*[tiab] OR Gambia*[tiab] OR Ghana*[tiab]<br/>27 OR Guinea*[tiab] OR Guinea-Bissau*[tiab] OR Liberia*[tiab] OR Mali*[tiab] OR<br/>28 Mauritania*[tiab] OR Niger*[tiab] OR Nigeria*[tiab] OR Senegal*[tiab] OR Sierra Leone*[tiab]<br/>29 OR Togo*[tiab] OR Eswatini*[tiab] OR Seychelles*[tiab] OR sub-Saharan*[tiab])<br/>30<br/>31<br/>32<br/>33<br/>34<br/>35<br/>36<br/>37<br/>38</p> <p>39 <b>Filters: from 2010 – 2020</b><br/>40<br/>41<br/>42<br/>43</p> | <p>2,849</p> |
|--|------------------------------------------------------------------------------------------------------------------------------------------------------------------------------------------------------------------------------------------------------------------------------------------------------------------------------------------------------------------------------------------------------------------------------------------------------------------------------------------------------------------------------------------------------------------------------------------------------------------------------------------------------------------------------------------------------------------------------------------------------------------------------------------------------------------------------------------------------------------------------------------------------------------------------------------------------------------------------------------------------------------------------------------------------------------------------------------------------------------------------------------------------------------------------------------------------------------------------------------------------------------------------------------------------------------------------------------------------------------------------------------------------------------------------------------------------------------------------------------------------------------------------------------------------------------------------------------------------------------------------------------------------------------------------------------------------------------------------------------------------------------------------------------------------------------------------------------------------------------------------------------------------------------------------------------------------------------------------------------------------------------------------------------------------------------------------------------------------------------------------------------------------------------------------------------------------------------------------------------------------------------------------------------------------------------------------|--------------|

44 **2. EMBASE**  
45

|  |                                                                                                                                                                                                                                                                                                                                                                                                                                                                                                                                                                                                                                                                                                      |              |
|--|------------------------------------------------------------------------------------------------------------------------------------------------------------------------------------------------------------------------------------------------------------------------------------------------------------------------------------------------------------------------------------------------------------------------------------------------------------------------------------------------------------------------------------------------------------------------------------------------------------------------------------------------------------------------------------------------------|--------------|
|  | <p>46 (exp surgery/ OR surgery.fs. OR exp obstetric operation/ OR exp anaesthesia/ OR<br/>47 surger*.ti,ab,kw. OR surgical.ti,ab,kw. OR anaesthe*.ti,ab,kw. OR anesthe*.ti,ab,kw.) AND<br/>48 (exp Health Care Cost/ OR Economics/ OR Universal Health Insurance/ OR exp Health<br/>49 Insurance/ OR exp Fee/ OR budget/ OR Funding/ OR value-based purchasing/ OR<br/>50 Universal Health Care/ OR Health Care Planning/ OR Social Welfare/ OR health<br/>51 priorit*.ti,ab,kw. OR Health Care Policy/ OR Financ*.ti,ab,kw. OR Universal Health<br/>52 Care.ti,ab,kw OR Universal Health Coverage.ti,ab,kw. OR budget allocation*.ti,ab,kw. OR<br/>53<br/>54<br/>55<br/>56<br/>57<br/>58<br/>59</p> | <p>3,661</p> |
|--|------------------------------------------------------------------------------------------------------------------------------------------------------------------------------------------------------------------------------------------------------------------------------------------------------------------------------------------------------------------------------------------------------------------------------------------------------------------------------------------------------------------------------------------------------------------------------------------------------------------------------------------------------------------------------------------------------|--------------|

payment\*.ti,ab,kw. OR Health Insurance.ti,ab,kw. OR National Health Account\*.ti,ab,kw. OR Revenue\*.ti,ab,kw. OR expenditure\*.ti,ab,kw.) AND (exp "Africa south of the Sahara"/ OR Cameroon\*.ti,ab,kw. OR Central African Republic\*.ti,ab,kw. OR Congo\*.ti,ab,kw. OR Chad\*.ti,ab,kw. OR Democratic Republic of the Congo\*.ti,ab,kw. OR Equatorial Guinea\*.ti,ab,kw. OR Gabon\*.ti,ab,kw. OR "Sao Tome and Principe\*".ti,ab,kw. OR Burundi\*.ti,ab,kw. OR Madagasca\*.ti,ab,kw. OR Comoros\*.ti,ab,kw. OR Mauriti\*.ti,ab,kw. OR Eritrea\*.ti,ab,kw. OR Ethiopia\*.ti,ab,kw. OR Kenya\*.ti,ab,kw. OR Rwanda\*.ti,ab,kw. OR Somalia\*.ti,ab,kw. OR South Sudan\*.ti,ab,kw. OR Sudan\*.ti,ab,kw. OR Tanzania\*.ti,ab,kw. OR Uganda\*.ti,ab,kw. OR Angola\*.ti,ab,kw. OR Botswana\*.ti,ab,kw. OR Lesotho\*.ti,ab,kw. OR Malawi\*.ti,ab,kw. OR Mozambi\*.ti,ab,kw. OR Namibia\*.ti,ab,kw. OR South Africa\*.ti,ab,kw. OR Swaziland\*.ti,ab,kw. OR Zambia\*.ti,ab,kw. OR Zimbabwe\*.ti,ab,kw. OR Benin\*.ti,ab,kw. OR Burkina Faso\*.ti,ab,kw. OR Cabo Verde\*.ti,ab,kw. OR Cote d'Ivoire\*.ti,ab,kw. OR Gambia\*.ti,ab,kw. OR Ghana\*.ti,ab,kw. OR Guinea\*.ti,ab,kw. OR Guinea-Bissau\*.ti,ab,kw. OR Liberia\*.ti,ab,kw. OR Mali\*.ti,ab,kw. OR Mauritania\*.ti,ab,kw. OR Niger\*.ti,ab,kw. OR Nigeria\*.ti,ab,kw. OR Senegal\*.ti,ab,kw. OR Sierra Leone\*.ti,ab,kw. OR Togo\*.ti,ab,kw. OR Eswatini\*.ti,ab,kw. OR Seychelles\*.ti,ab,kw. OR sub-Saharan\*.ti,ab,kw. OR Africa\*.ti,ab,kw.)

**Filters: from 2010 – 2020**

### 3. Global Health Database

("Surgical Procedures" or "surgery" or anaesthesia or anesthesia or anaesthesia or surger\* or surgical).mp. AND ("Healthcare Financing" or "Health Policy" or "Universal Health Insurance" or "Health Planning" or "Health Expenditures" or Expenditure\* or "Health Insurance" or "Health Services" or "health economics" or Economics or "Fund raising" or "Health Care Costs" or "Fees and Charges" OR Financing" or budgets or "Health Services Accessibility" or "health priorit\*" or Financ\* or Revenue\* or Charities or "Universal Health Care" or "Universal Health Coverage" or "National Health Accounts" or payment\* or Budget allocation\* or "Health Insurance").mp. AND ("Africa South of the Sahara" or Africa\* or Cameroon\* or "Central African Republic\*" or Congo\* or Chad\* or "Democratic Republic of the Congo\*" or "Equatorial Guinea\*" or Gabon\* or "Sao Tome and Principe\*" or Burundi\* or Madagascar\* or Comoros\* or Mauriti\* or Eritrea\* or Ethiopia\* or Kenya\* or

792

Rwanda\* or Somalia\* or South Sudan\* or Sudan\* or Tanzania\* or Uganda\* or Angola\* or Botswana\* or Lesotho\* or Malawi\* or Mozambique\* or Namibia\* or "South Africa\*" or Swaziland\* or Zambia\* or Zimbabwe\* or Benin\* or "Burkina Faso\*" or Cabo Verde\* or "Cote d'Ivoire\*" or Gambia\* or Ghana\* or Guinea\* or Guinea-Bissau\* or Liberia\* or Mali\* or Mauritania\* or Niger\* or Nigeria\* or Senegal\* or Sierra Leone\* or Togo\* or eswatini\* or Seychelles\* or sub-Saharan\*).mp.

**Filters: from 2010 – 2020**

For peer review only

S2: Preferred Reporting Items for Systematic reviews and Meta-Analyses extension for Scoping Reviews (PRISMA-ScR) Checklist

| SECTION                                               | ITEM | PRISMA-ScR CHECKLIST ITEM                                                                                                                                                                                                                                                                                  | REPORTED ON PAGE # |
|-------------------------------------------------------|------|------------------------------------------------------------------------------------------------------------------------------------------------------------------------------------------------------------------------------------------------------------------------------------------------------------|--------------------|
| <b>TITLE</b>                                          |      |                                                                                                                                                                                                                                                                                                            |                    |
| Title                                                 | 1    | Identify the report as a scoping review.                                                                                                                                                                                                                                                                   | 1                  |
| <b>ABSTRACT</b>                                       |      |                                                                                                                                                                                                                                                                                                            |                    |
| Structured summary                                    | 2    | Provide a structured summary that includes (as applicable): background, objectives, eligibility criteria, sources of evidence, charting methods, results, and conclusions that relate to the review questions and objectives.                                                                              | 3                  |
| <b>INTRODUCTION</b>                                   |      |                                                                                                                                                                                                                                                                                                            |                    |
| Rationale                                             | 3    | Describe the rationale for the review in the context of what is already known. Explain why the review questions/objectives lend themselves to a scoping review approach.                                                                                                                                   | 5-6                |
| Objectives                                            | 4    | Provide an explicit statement of the questions and objectives being addressed with reference to their key elements (e.g., population or participants, concepts, and context) or other relevant key elements used to conceptualize the review questions and/or objectives.                                  | 7-8                |
| <b>METHODS</b>                                        |      |                                                                                                                                                                                                                                                                                                            |                    |
| Protocol and registration                             | 5    | Indicate whether a review protocol exists; state if and where it can be accessed (e.g., a Web address); and if available, provide registration information, including the registration number.                                                                                                             | Not Applicable     |
| Eligibility criteria                                  | 6    | Specify characteristics of the sources of evidence used as eligibility criteria (e.g., years considered, language, and publication status), and provide a rationale.                                                                                                                                       | 8-11               |
| Information sources*                                  | 7    | Describe all information sources in the search (e.g., databases with dates of coverage and contact with authors to identify additional sources), as well as the date the most recent search was executed.                                                                                                  | 8                  |
| Search                                                | 8    | Present the full electronic search strategy for at least 1 database, including any limits used, such that it could be repeated.                                                                                                                                                                            | 8                  |
| Selection of sources of evidence†                     | 9    | State the process for selecting sources of evidence (i.e., screening and eligibility) included in the scoping review.                                                                                                                                                                                      | 8-11               |
| Data charting process‡                                | 10   | Describe the methods of charting data from the included sources of evidence (e.g., calibrated forms or forms that have been tested by the team before their use, and whether data charting was done independently or in duplicate) and any processes for obtaining and confirming data from investigators. | 11                 |
| Data items                                            | 11   | List and define all variables for which data were sought and any assumptions and simplifications made.                                                                                                                                                                                                     | 11                 |
| Critical appraisal of individual sources of evidence§ | 12   | If done, provide a rationale for conducting a critical appraisal of included sources of evidence; describe the methods used and how this information was used in any data synthesis (if appropriate).                                                                                                      | Not Applicable     |
| Synthesis of results                                  | 13   | Describe the methods of handling and summarizing the data that were charted.                                                                                                                                                                                                                               | 11                 |

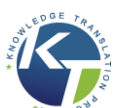

| SECTION                                       | ITEM | PRISMA-ScR CHECKLIST ITEM                                                                                                                                                                       | REPORTED ON PAGE # |
|-----------------------------------------------|------|-------------------------------------------------------------------------------------------------------------------------------------------------------------------------------------------------|--------------------|
| <b>RESULTS</b>                                |      |                                                                                                                                                                                                 |                    |
| Selection of sources of evidence              | 14   | Give numbers of sources of evidence screened, assessed for eligibility, and included in the review, with reasons for exclusions at each stage, ideally using a flow diagram.                    | 12-13              |
| Characteristics of sources of evidence        | 15   | For each source of evidence, present characteristics for which data were charted and provide the citations.                                                                                     | 12-13              |
| Critical appraisal within sources of evidence | 16   | If done, present data on critical appraisal of included sources of evidence (see item 12).                                                                                                      | Not Applicable     |
| Results of individual sources of evidence     | 17   | For each included source of evidence, present the relevant data that were charted that relate to the review questions and objectives.                                                           | 13-20              |
| Synthesis of results                          | 18   | Summarize and/or present the charting results as they relate to the review questions and objectives.                                                                                            | 13-20              |
| <b>DISCUSSION</b>                             |      |                                                                                                                                                                                                 |                    |
| Summary of evidence                           | 19   | Summarize the main results (including an overview of concepts, themes, and types of evidence available), link to the review questions and objectives, and consider the relevance to key groups. | 20-22              |
| Limitations                                   | 20   | Discuss the limitations of the scoping review process.                                                                                                                                          | 22-23              |
| Conclusions                                   | 21   | Provide a general interpretation of the results with respect to the review questions and objectives, as well as potential implications and/or next steps.                                       | 23                 |
| <b>FUNDING</b>                                |      |                                                                                                                                                                                                 |                    |
| Funding                                       | 22   | Describe sources of funding for the included sources of evidence, as well as sources of funding for the scoping review. Describe the role of the funders of the scoping review.                 | 24                 |

JBI = Joanna Briggs Institute; PRISMA-ScR = Preferred Reporting Items for Systematic reviews and Meta-Analyses extension for Scoping Reviews.

\* Where *sources of evidence* (see second footnote) are compiled from, such as bibliographic databases, social media platforms, and Web sites.

† A more inclusive/heterogeneous term used to account for the different types of evidence or data sources (e.g., quantitative and/or qualitative research, expert opinion, and policy documents) that may be eligible in a scoping review as opposed to only studies. This is not to be confused with *information sources* (see first footnote).

‡ The frameworks by Arksey and O'Malley (6) and Levac and colleagues (7) and the JBI guidance (4, 5) refer to the process of data extraction in a scoping review as data charting.

§ The process of systematically examining research evidence to assess its validity, results, and relevance before using it to inform a decision. This term is used for items 12 and 19 instead of "risk of bias" (which is more applicable to systematic reviews of interventions) to include and acknowledge the various sources of evidence that may be used in a scoping review (e.g., quantitative and/or qualitative research, expert opinion, and policy document).

From: Tricco AC, Lillie E, Zarin W, O'Brien KK, Colquhoun H, Levac D, et al. PRISMA Extension for Scoping Reviews (PRISMA-ScR): Checklist and Explanation. *Ann Intern Med.* ;169:467–473. doi: 10.7326/M18-0850

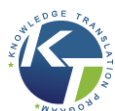

St. Michael's

Inspired Care.  
Inspiring Science.

For peer review only - <http://bmjopen.bmj.com/site/about/guidelines.xhtml>

## S3: Breakdown of Included Articles by Countries of Focus

| <b>Country</b> | <b>Number of Related Publications</b> |
|----------------|---------------------------------------|
| Benin          | 9                                     |
| Botswana       | 1                                     |
| Burkina Faso   | 6                                     |
| Cameroon       | 9                                     |
| DRC            | 6                                     |
| Ethiopia       | 8                                     |
| Gabon          | 2                                     |
| Ghana          | 13                                    |
| Guinea         | 3                                     |
| Kenya          | 14                                    |
| Madagascar     | 5                                     |
| Malawi         | 5                                     |
| Mali           | 8                                     |
| Mauritania     | 1                                     |
| Mozambique     | 2                                     |
| Namibia        | 2                                     |
| Nigeria        | 34                                    |
| Rwanda         | 5                                     |
| Senegal        | 3                                     |
| Sierra Leone   | 4                                     |
| South Africa   | 3                                     |
| Sudan          | 2                                     |
| Tanzania       | 11                                    |
| Togo           | 2                                     |
| Uganda         | 15                                    |
| Zambia         | 2                                     |
| Zimbabwe       | 2                                     |
| Non-Specific   | 8                                     |
