# Supplementary material for: Financing of surgery and anaesthesia in sub-Saharan Africa: a scoping review
Source: PubMed Central journal article supplement — BMJ Open. 2021 Oct 18;11(10):e051617. doi: 10.1136/bmjopen-2021-051617 (PMC8527159; doi:10.1136/bmjopen-2021-051617), 2021-10-18
Supplement: bmjopen-2021-051617supp001.pdf [file bmjopen-2021-051617supp001.pdf]

**S1: Search Query****1. PUBMED**

|  |                                                                                                                                                                                                                                                                                                                                                                                                                                                                                                                                                                                                                                                                                                                                                                                                                                                                                                                                                                                                                                                                                                                                                                                                                                                                                                                                                                                                                                                                                                                                                                                                                                                                                                                                                                                                                                                                                                                                                                                                                                                                     |                     |
|--|---------------------------------------------------------------------------------------------------------------------------------------------------------------------------------------------------------------------------------------------------------------------------------------------------------------------------------------------------------------------------------------------------------------------------------------------------------------------------------------------------------------------------------------------------------------------------------------------------------------------------------------------------------------------------------------------------------------------------------------------------------------------------------------------------------------------------------------------------------------------------------------------------------------------------------------------------------------------------------------------------------------------------------------------------------------------------------------------------------------------------------------------------------------------------------------------------------------------------------------------------------------------------------------------------------------------------------------------------------------------------------------------------------------------------------------------------------------------------------------------------------------------------------------------------------------------------------------------------------------------------------------------------------------------------------------------------------------------------------------------------------------------------------------------------------------------------------------------------------------------------------------------------------------------------------------------------------------------------------------------------------------------------------------------------------------------|---------------------|
|  | <p>("Surgical Procedures, Operative"[Mesh] OR "surgery"[subheading] OR anaesthe*[tiab] OR anesথে*[tiab] OR anaesthesia[Mesh] OR "Specialties, Surgical"[Mesh] OR surger*[tiab] OR surgical[tiab]) AND ("Healthcare Financing"[Mesh] OR "Health Policy"[mesh] OR Universal Health Insurance[Mesh] OR "Health Planning"[Mesh] OR "Health Expenditures"[Mesh] OR Expenditure*[tiab] OR "Insurance, Health"[Mesh] OR Health Services/Economics[Mesh] OR Economics[Mesh:NoExp] OR Fund raising[Mesh] OR Health Care Costs[Mesh] OR Fees and Charges[mesh] OR "Financing, Personal"[Mesh] OR budgets[mesh] OR Health Services Accessibility/Economics[Mesh] OR health priorit*[tiab] OR Financ*[tiab] OR Revenue*[tiab] OR Charities/economics[mesh] OR "Universal Health Care"[tiab] OR Universal Health Coverage[tiab] OR "National Health Accounts"[tiab] OR payment*[tiab] OR Budget allocation*[tiab] OR Health Insurance[tiab]) AND ("Africa South of the Sahara"[Mesh] OR Africa*[tiab] OR Cameroon*[tiab] OR Central African Republic*[tiab] OR Congo*[tiab] OR Chad*[tiab] OR Democratic Republic of the Congo*[tiab] OR Equatorial Guinea*[tiab] OR Gabon*[tiab] OR Sao Tome and Principe*[tiab] OR Burundi*[tiab] OR Madagasca*[tiab] OR Comoros*[tiab] OR Mauriti*[tiab] OR Eritrea*[tiab] OR Ethiopia*[tiab] OR Kenya*[tiab] OR Rwanda*[tiab] OR Somalia*[tiab] OR South Sudan*[tiab] OR Sudan*[tiab] OR Tanzania*[tiab] OR Uganda*[tiab] OR Angola*[tiab] OR Botswana*[tiab] OR Lesotho*[tiab] OR Malawi*[tiab] OR Mozambi*[tiab] OR Namibia*[tiab] OR South Africa*[tiab] OR Swaziland*[tiab] OR Zambia*[tiab] OR Zimbabwe*[tiab] OR Benin*[tiab] OR Burkina Faso*[tiab] OR Cabo Verde*[tiab] OR Cote d'Ivoire*[tiab] OR Gambia*[tiab] OR Ghana*[tiab] OR Guinea*[tiab] OR Guinea-Bissau*[tiab] OR Liberia*[tiab] OR Mali*[tiab] OR Mauritania*[tiab] OR Niger*[tiab] OR Nigeria*[tiab] OR Senegal*[tiab] OR Sierra Leone*[tiab] OR Togo*[tiab] OR Eswatini*[tiab] OR Seychelles*[tiab] OR sub-Saharan*[tiab])</p> <p><b>Filters: from 2010 – 2020</b></p> | <p><u>2,849</u></p> |
|--|---------------------------------------------------------------------------------------------------------------------------------------------------------------------------------------------------------------------------------------------------------------------------------------------------------------------------------------------------------------------------------------------------------------------------------------------------------------------------------------------------------------------------------------------------------------------------------------------------------------------------------------------------------------------------------------------------------------------------------------------------------------------------------------------------------------------------------------------------------------------------------------------------------------------------------------------------------------------------------------------------------------------------------------------------------------------------------------------------------------------------------------------------------------------------------------------------------------------------------------------------------------------------------------------------------------------------------------------------------------------------------------------------------------------------------------------------------------------------------------------------------------------------------------------------------------------------------------------------------------------------------------------------------------------------------------------------------------------------------------------------------------------------------------------------------------------------------------------------------------------------------------------------------------------------------------------------------------------------------------------------------------------------------------------------------------------|---------------------|

**2. EMBASE**

|  |                                                                                                                                                                                                                                                                                                                                                                                                                                                                                                                                                                                                       |                     |
|--|-------------------------------------------------------------------------------------------------------------------------------------------------------------------------------------------------------------------------------------------------------------------------------------------------------------------------------------------------------------------------------------------------------------------------------------------------------------------------------------------------------------------------------------------------------------------------------------------------------|---------------------|
|  | <p>(exp surgery/ OR surgery.fs. OR exp obstetric operation/ OR exp anaesthesia/ OR surger*.ti,ab,kw. OR surgical.ti,ab,kw. OR anaesthe*.ti,ab,kw. OR anesথে*.ti,ab,kw.) AND (exp Health Care Cost/ OR Economics/ OR Universal Health Insurance/ OR exp Health Insurance/ OR exp Fee/ OR budget/ OR Funding/ OR value-based purchasing/ OR Universal Health Care/ OR Health Care Planning/ OR Social Welfare/ OR health priorit*.ti,ab,kw. OR Health Care Policy/ OR Financ*.ti,ab,kw. OR Universal Health Care.ti,ab,kw OR Universal Health Coverage.ti,ab,kw. OR budget allocation*.ti,ab,kw. OR</p> | <p><u>3,661</u></p> |
|--|-------------------------------------------------------------------------------------------------------------------------------------------------------------------------------------------------------------------------------------------------------------------------------------------------------------------------------------------------------------------------------------------------------------------------------------------------------------------------------------------------------------------------------------------------------------------------------------------------------|---------------------|

payment\*.ti,ab,kw. OR Health Insurance.ti,ab,kw. OR National Health Account\*.ti,ab,kw. OR Revenue\*.ti,ab,kw. OR expenditure\*.ti,ab,kw.) AND (exp "Africa south of the Sahara"/ OR Cameroon\*.ti,ab,kw. OR Central African Republic\*.ti,ab,kw. OR Congo\*.ti,ab,kw. OR Chad\*.ti,ab,kw. OR Democratic Republic of the Congo\*.ti,ab,kw. OR Equatorial Guinea\*.ti,ab,kw. OR Gabon\*.ti,ab,kw. OR "Sao Tome and Principe\*".ti,ab,kw. OR Burundi\*.ti,ab,kw. OR Madagasca\*.ti,ab,kw. OR Comoros\*.ti,ab,kw. OR Mauriti\*.ti,ab,kw. OR Eritrea\*.ti,ab,kw. OR Ethiopia\*.ti,ab,kw. OR Kenya\*.ti,ab,kw. OR Rwanda\*.ti,ab,kw. OR Somalia\*.ti,ab,kw. OR South Sudan\*.ti,ab,kw. OR Sudan\*.ti,ab,kw. OR Tanzania\*.ti,ab,kw. OR Uganda\*.ti,ab,kw. OR Angola\*.ti,ab,kw. OR Botswana\*.ti,ab,kw. OR Lesotho\*.ti,ab,kw. OR Malawi\*.ti,ab,kw. OR Mozambi\*.ti,ab,kw. OR Namibia\*.ti,ab,kw. OR South Africa\*.ti,ab,kw. OR Swaziland\*.ti,ab,kw. OR Zambia\*.ti,ab,kw. OR Zimbabwe\*.ti,ab,kw. OR Benin\*.ti,ab,kw. OR Burkina Faso\*.ti,ab,kw. OR Cabo Verde\*.ti,ab,kw. OR Cote d'Ivoire\*.ti,ab,kw. OR Gambia\*.ti,ab,kw. OR Ghana\*.ti,ab,kw. OR Guinea\*.ti,ab,kw. OR Guinea-Bissau\*.ti,ab,kw. OR Liberia\*.ti,ab,kw. OR Mali\*.ti,ab,kw. OR Mauritania\*.ti,ab,kw. OR Niger\*.ti,ab,kw. OR Nigeria\*.ti,ab,kw. OR Senegal\*.ti,ab,kw. OR Sierra Leone\*.ti,ab,kw. OR Togo\*.ti,ab,kw. OR Eswatini\*.ti,ab,kw. OR Seychelles\*.ti,ab,kw. OR sub-Saharan\*.ti,ab,kw. OR Africa\*.ti,ab,kw.)

**Filters: from 2010 – 2020**

### 3. Global Health Database

("Surgical Procedures" or "surgery" or anaesthesia or anesthesia or anaesthesia or surger\* or surgical).mp. AND ("Healthcare Financing" or "Health Policy" or "Universal Health Insurance" or "Health Planning" or "Health Expenditures" or Expenditure\* or "Health Insurance" or "Health Services" or "health economics" or Economics or "Fund raising" or "Health Care Costs" or "Fees and Charges" OR Financing" or budgets or "Health Services Accessibility" or "health priorit\*" or Financ\* or Revenue\* or Charities or "Universal Health Care" or "Universal Health Coverage" or "National Health Accounts" or payment\* or Budget allocation\* or "Health Insurance").mp. AND ("Africa South of the Sahara" or Africa\* or Cameroon\* or "Central African Republic\*" or Congo\* or Chad\* or "Democratic Republic of the Congo\*" or "Equatorial Guinea\*" or Gabon\* or "Sao Tome and Principe\*" or Burundi\* or Madagascar\* or Comoros\* or Mauriti\* or Eritrea\* or Ethiopia\* or Kenya\* or

792

Rwanda\* or Somalia\* or South Sudan\* or Sudan\* or Tanzania\* or Uganda\* or Angola\* or Botswana\* or Lesotho\* or Malawi\* or Mozambique\* or Namibia\* or "South Africa\*" or Swaziland\* or Zambia\* or Zimbabwe\* or Benin\* or "Burkina Faso\*" or Cabo Verde\* or "Cote d'Ivoire\*" or Gambia\* or Ghana\* or Guinea\* or Guinea-Bissau\* or Liberia\* or Mali\* or Mauritania\* or Niger\* or Nigeria\* or Senegal\* or Sierra Leone\* or Togo\* or eswatini\* or Seychelles\* or sub-Saharan\*).mp.

**Filters: from 2010 – 2020**
