# Supplementary material for: Financing of surgery and anaesthesia in sub-Saharan Africa: a scoping review
Source: PubMed Central journal article supplement — BMJ Open. 2021 Oct 18;11(10):e051617. doi: 10.1136/bmjopen-2021-051617 (PMC8527159; doi:10.1136/bmjopen-2021-051617), 2021-10-18
Supplement: bmjopen-2021-051617supp002.pdf [file bmjopen-2021-051617supp002.pdf]

## S3: Breakdown of Included Articles by Countries of Focus

| <b>Country</b> | <b>Number of Related Publications</b> |
|----------------|---------------------------------------|
| Benin          | 9                                     |
| Botswana       | 1                                     |
| Burkina Faso   | 6                                     |
| Cameroon       | 9                                     |
| DRC            | 6                                     |
| Ethiopia       | 8                                     |
| Gabon          | 2                                     |
| Ghana          | 13                                    |
| Guinea         | 3                                     |
| Kenya          | 14                                    |
| Madagascar     | 5                                     |
| Malawi         | 5                                     |
| Mali           | 8                                     |
| Mauritania     | 1                                     |
| Mozambique     | 2                                     |
| Namibia        | 2                                     |
| Nigeria        | 34                                    |
| Rwanda         | 5                                     |
| Senegal        | 3                                     |
| Sierra Leone   | 4                                     |
| South Africa   | 3                                     |
| Sudan          | 2                                     |
| Tanzania       | 11                                    |
| Togo           | 2                                     |
| Uganda         | 15                                    |
| Zambia         | 2                                     |
| Zimbabwe       | 2                                     |
| Non-Specific   | 8                                     |
